# Supplementary material for: The Fission Yeast Homeodomain Protein Yox1p Binds to MBF and Confines MBF-Dependent Cell-Cycle Transcription to G1-S via Negative Feedback
Source: PLoS Genet. 2009 Aug 28;5(8):e1000626. doi: 10.1371/journal.pgen.1000626 (PMC2726434; doi:10.1371/journal.pgen.1000626)
Supplement: Table S1 — Expression ratios of yox1Δ relative to wild-type cells for all genes from three custom-spotted arrays and two Affymetrix chips (0.95 MB XLS) [file pgen.1000626.s001.xls]

## Sheet: Sheet1
Normalized xpression ratios of yox1Δ relative to wild-type cells using 3 spotted arrays and 2 Affymetrix arrays.
Common name	Systematic name	Synonyms	Custom-spotted R1	Custom-spotted R2	Custom-spotted R3	Affymetrix R1	Affymetrix R2
	SPAC1D4.10	SPAC1D4.10	1.024	0.779	1.008	1.06217	1.32241
	SPCC737.08	SPCC10D6.03c;SPCC737.08	1.077	1.131	1.159	0.849199	0.998319
ddi1;ucp1;mud1	SPAC56F8.08	SPAC56F8.08;ddi1;ucp1;mud1	0.992	1.102	1.15	0.892186	0.763895
	SPAC1D4.14	SPAC1D4.14;SPAC22F3.14c	1.087	0.903	1.088	0.792111	1.12797
	SPAC24B11.12c	SPAC24B11.12c	0.923	1.162	1.096	0.731825	0.703166
	SPAC11D3.01c	SPAC11D3.01c	1.153	1.349	1.467	1.03359	1.16574
elg1	SPBC947.11c	SPBC947.11c;elg1				0.882265	0.960601
gpi10	SPCC16A11.06c	SPCC16A11.06c;gpi10			1.491	1.33238	1.26923
rpn2	SPBC17D11.07c	SPBC17D11.07c;rpn2	1.032	1.069	0.937	0.797351	0.769096
rpn3	SPBC119.01	SPBC119.01;SPBPJ4664.07;rpn3	0.925	0.92	1.028	0.996087	0.991256
rpn501;rpn5;rpn5-a	SPAC1420.03	SPAC1420.03;rpn501;rpn5;rpn5-a	0.95	0.954	0.973	1.11237	1.22339
slt1	SPAC17G6.13	SPAC17G6.13;slt1	1.094	0.979	0.739	1.6753	2.17314
rpn6	SPAC23G3.11	SPAC23G3.11;rpn6	0.939	0.903	0.952	1.04118	1.01556
pip1;rbx1	SPAC23H4.18c	SPAC23H4.18c;pip1;rbx1	0.964	0.728	1.105	0.877603	0.647423
rpn7	SPBC582.07c	SPAC19G10.05;SPBC582.07c;rpn7	1.01	0.875	0.836	1.0337	1.02355
rpn8	SPCC1682.10	SPCC1682.10;rpn8	0.912	0.858	0.967	1.03146	1.03253
rpn9;mts1	SPAC607.05	SPAC607.05;rpn9;mts1	1.013	0.92	0.989	1.03839	0.949744
ade10	SPCPB16A4.03c	SPCPB16A4.03c;ade10	0.943	1.054	0.84	1.02014	0.924079
	SPAC1327.01c	SPAC1327.01c;SPAC1783.09c;SPAC18G6.16c	0.871	0.865	0.761	0.824801	0.624742
	SPAC212.02	SPAC212.02			1.136	0.187125	0.0361982
	SPAC212.03	SPAC212.03			0.915	1	1
	SPCC162.11c	SPCC162.11c	1.094	0.941	1.183	0.825727	0.840501
	SPCC1322.02	SPCC1322.02	1.001		0.884	0.910683	1.02121
	SPCC1322.03	SPCC1322.03	1.023	1.042	1.042	1.18614	0.347586
	SPCC1322.04	SPCC1322.04	0.937	1.085		1.0167	1.18237
	SPAC30D11.08c	SPAC30D11.08c	1.108	0.993	1.052	1.2337	1.1667
kap113	SPCC1322.06	SPCC1322.06;kap113				0.951089	0.954366
	SPAC11D3.02c	SPAC11D3.02c	1.093	1.122		1.53605	1.9665
	SPAC1952.06c	SPAC1952.06c				0.943464	1.09314
srk1;mkp1	SPCC1322.08	SPCC1322.08;srk1;mkp1	1.2	1.191	0.845	0.919132	1.11962
	SPCC1322.09	SPCC1322.09	0.899	0.999	0.856	0.646548	0.713494
	SPAC1B3.10c	SPAC1B3.10c			1.039	0.288792	0.975658
ral1;scd1	SPAC16E8.09	SPAC16E8.09;ral1;scd1	1.02	1.03	0.831	1.07576	1.01778
mfm1	SPAPB8E5.05	SPAPB8E5.05;mfm1			0.777	1	1
kap104	SPAC2F3.06c	SPAC2F3.06c;kap104	0.991	0.93	1.043	0.901927	0.959276
mfm2	SPAC513.03	SPAC513.03;mfm2			0.163	0.104236	0.0882556
slu7	SPBC365.05c	SPBC365.05c;slu7	0.825	0.803	1	0.67494	0.791361
	SPCC1739.08c	SPCC1739.08c			0.97	1.25424	1
mfm3	SPBPJ4664.03	SPBPJ4664.03;mfm3	0.775	0.938	0.813	0.388266	0.503935
	SPBC887.01	SPBC887.01	1.03	1.166	0.934	1.06357	1.24233
	SPBC887.02	SPBC887.02				1.04133	1.03437
	SPAC212.10	SPAC212.10	0.851	1.35	0.872	1.0351	1.0351
mrpl38	SPBC887.07	SPBC887.07;mrpl38	0.979	1.064	0.846	1.24738	1.16275
	SPBC1E8.03c	SPBC1E8.03c	1.154	0.847	0.967	1.17102	1.20037
	SPAC212.11	SPAC212.11
	SPAPB24D3.02c	SPAPB24D3.02c	0.89	0.78	1.164	1.04806	1.20854
	SPBC887.08	SPBC887.08	1.04	0.953	1.058	0.766795	0.787737
rsm18	SPCC18B5.04	SPBC18B5.04;SPCC18B5.04;rsm18	0.952	0.68		1.33862	1.13145
pmo25	SPAC1834.06c	SPAC1834.06c;pmo25	1.009	1.144	0.986	0.948608	0.95846
sup45;erf1	SPCC18B5.06	SPBC18B5.06;SPCC18B5.06;sup45;erf1		1.194		1.26538	1.31245
	SPCC1322.10	SPCC1322.10	0.968	0.873	0.935	0.864722	0.693375
ykt6	SPBC13G1.11	SPBC13G1.11;ykt6	0.809	0.947	0.989	1.14364	1.04901
	SPCC2H8.05c	SPCC2H8.05c;SPCC63.01c	1.089	0.853	1.176	1.17295	1.44728
	SPBC23G7.13c	SPBC23G7.13c			0.626	0.990747	0.990747
	SPCC1322.16	SPCC1322.16	0.998	0.904	1.001	1.06885	1.07113
	SPAC11D3.03c	SPAC11D3.03c				1.07049	1.01927
rpp0	SPCC18.14c	SPCC18.14c;rpp0	0.982	1.058	0.924	0.927082	0.976315
sod2	SPAC1486.01	SPAC1486.01;sod2	0.892	0.907	1.011	0.892267	0.763047
	SPAC26A3.06	SPAC26A3.06	1.044	1.038	1.098	0.860095	1.01305
smb';smb;smb1	SPAC26A3.08	SPAC26A3.08;smb';smb;smb1	1.089	0.783	0.866	1.17163	0.878193
kap114	SPAC22H10.03c	SPAC22H10.03c;kap114	0.864	1.024	0.945	1.00859	1.12803
cox13	SPCC1739.09c	SPCC1739.09c;cox13	1.131	0.815	1.036	0.699343	0.757179
	SPAC959.03c	SPAC959.03c	0.88	1.049	1.275	0.877806	1.09194
pus2	SPBC887.11	SPBC887.11;pus2				0.691656	0.77423
	SPAC20G8.02	SPAC20G8.02		1.1	0.986	0.833278	0.904772
	SPBC887.12	SPBC887.12	1.024	1.035	0.873	0.836741	0.911549
	SPAC20G8.06	SPAC20G8.06	0.923	1.238	0.908	0.914961	1.02749
	SPAC17G8.11c	SPAC17G8.11c	0.959	0.934	0.948	0.671693	0.527496
	SPBC887.16	SPBC887.16	0.82	1.325	0.826	1	1
Tf2-10-pseudo	SPBC1E8.04	SPBC1E8.04;SPBC1E8.04c;Tf2-10-pseudo	1.269	1.81	1.221
	SPCC14G10.01	SPBC18B5.12;SPCC14G10.01;SPCC18B5.12	1.078	0.907	1.029	1.30564	1.2214
	SPBC887.17	SPBC887.17	0.733	1.009	0.983	1.41235	1.90681
	SPCC14G10.02	SPBC18B5.13;SPCC14G10.02;SPCC18B5.13	0.992	1.151	1.19	0.953642	1.18266
rft1	SPBC887.19	SPBC887.19;rft1			0.796	0.993385	1.08819
	SPCC794.11c	SPCC794.11c	1.004	1.031	0.936	1.10808	0.904708
	SPCC63.02c	SPCC63.02c	0.839	0.965	0.909	0.848308	0.844331
	SPAC26A3.10	SPAC26A3.10	0.814	0.825	0.884	0.93789	0.722376
	SPAC11D3.04c	SPAC11D3.04c	0.921	0.637	0.812	1.10102	0.847114
	SPAC26A3.11	SPAC26A3.11	1.048	0.837	1.027	1.07546	0.909786
	SPAC1952.08c	SPAC1952.08c	0.995	1.1	1.138	1.09734	1.19053
	SPBC947.14c	SPBC947.14c	0.933	0.935	0.767	1.18377	1.30173
	SPCC16A11.09c	SPCC16A11.09c	1.1	0.956	1.151	0.982017	1.02784
dph1;ucp5	SPAC26A3.16	SPAC26A3.16;dph1;ucp5				1.05081	1.18076
cwf9;smd2	SPAC2C4.03c	SPAC2C4.03c;cwf9;smd2	0.95	0.968	1.041	1.09983	0.943191
kap123	SPBC14F5.03c	SPBC14F5.03c;kap123	0.961	1.004	1.201	0.936613	1.0242
	SPAC959.04c	SPAC959.04c	1.039	1.234	0.775	1.11042	1.27724
nam9	SPBC13G1.01c	SPBC13G1.01c;nam9	1.078	0.986	1.143	1.14235	1.08271
moc1;psp1;sds23	SPBC646.13	SPBC646.13;moc1;psp1;sds23	0.944	1.119	0.799	1.04511	0.837692
	SPBC115.03	SPBC115.03;SPBC24E9.18c;SPBC839.18c	0.965	1.085	1.33	1.02504	0.953878
	SPBPB21E7.02c	SPAPB21E7.02c;SPBPB21E7.02c				0.818251	0.908178
	SPAC1851.04c	SPAC1851.04c;SPAC27D7.01c		0.98	0.944	0.958801	1.26513
ach1	SPAC1952.09c	SPAC1952.09c;ach1	1.061	1.128	0.983	1.02726	0.946021
	SPBC947.15c	SPBC947.15c	1.204	1.138	0.931	0.65302	0.732996
mis12	SPBC409.04c	SPBC409.04c;mis12			0.941	1.20654	1.14186
rps17-1;rps17;rps1701	SPBC839.05c	SPBC24E9.05c;SPBC839.05c;rps17-1;rps17;rps1701	0.843	1.126	0.948	0.987799	1.02131
rps1702;rps17;rps17-2	SPCC24B10.09	SPCC24B10.09;rps1702;rps17;rps17-2	0.914	1.058	0.904	0.955811	1.03879
	SPCC4G3.03	SPCC4G3.03				1.23431	0.566479
	SPAC959.05c	SPAC959.05c				1.32459	1.46842
mts1;sss1;atf1;gad7	SPBC29B5.01	SPBC29B5.01;mts1;sss1;atf1;gad7	1.305	1.149	0.448	0.815015	0.858949
cam2	SPAC29A4.05	SPAC29A4.05;cam2	1.025		0.945	0.896922	0.796821
srb6;med22	SPAC29A4.07	SPAC29A4.07;srb6;med22			1.168	1.20633	1.38413
	SPAC29A4.09	SPAC29A4.09	1.114	0.889	1.023	0.83665	0.90289
	SPAC1250.04c	SPAC1250.04c			1.152	1.42886	1.32926
mvp1	SPAC3A11.06	SPAC3A11.06;mvp1			0.983	0.840919	0.985087
ytm1	SPAC890.04c	SPAC890.04c;ytm1	1.017	0.988	1.291	0.907198	0.954408
gyp1	SPBC530.01	SPBC530.01;gyp1	0.924	0.957	1.001	0.764092	0.902761
	SPBC530.02	SPBC530.02				0.415604	0.160793
wtf14;wtf15	SPCC663.02	SPCC663.02;wtf14;wtf15	0.905	1.139	1.008	0.754945	0.9423
mod5	SPBC530.04	SPBC530.04;mod5	1.255	0.977	1.152	1.8035	1.47131
	SPBC530.05	SPBC530.05		1.053		0.938874	0.977494
	SPBC530.08	SPBC530.08				0.689071	0.749878
	SPBC1773.01	SPBC1773.01		1.211		0.844777	0.921835
ucp6	SPAC3F10.13	SPAC3F10.13;ucp6	0.962	1.021	0.846	0.946545	1.00749
		NULL_SPAC3F10.14			0.837
	SPBC1773.04	SPBC1773.04	0.864	1.147	0.959	0.912868	0.996366
	SPAC3F10.17	SPAC3F10.17	0.938			1.29351	1.26173
rrn5	SPAC29A4.10	SPAC29A4.10;rrn5	0.993	1.073	0.937	0.982694	0.657174
rga3	SPAC29A4.11	SPAC29A4.11;rga3	1.023	1.168	0.979	0.780788	1.17583
mlo1	SPCC31H12.03c	SPCC31H12.03c;mlo1	1.05	0.91	0.955	1.22165	1.15909
	SPAC8F11.09c	SPAC8F11.09c	1.019	0.881	0.969	1.49081	1.02765
	SPAC29A4.13	SPAC29A4.13	1.014	0.872	0.996	1.15096	1.41985
	SPBC25B2.01	SPBC25B2.01;SPBC2G5.08	1.03	1.086	0.831	0.875866	1.10586
	SPAC29A4.15	SPAC29A4.15	0.991	1.011	1.102	0.985453	0.985453
	SPAC10F6.04	SPAC10F6.04	1.226		0.967	0.837933	0.989741
hal4;sat4;ppk10	SPAC29A4.16	SPAC29A4.16;hal4;sat4;ppk10	0.842	1.002	0.934	0.649978	0.558223
	SPBC25B2.03	SPBC25B2.03	1.041	1.066	1.069	1.26367	1.25932
prw1	SPAC29A4.18	SPAC29A4.18;prw1	1.019	0.977	0.854	1.09836	0.961954
	SPAC513.06c	SPAC513.06c			0.992	0.834053	0.861323
	SPBC25B2.08	SPBC25B2.08	1.275		1.285	1.89846	2.0332
	SPCC663.10	SPCC663.10	0.937	1.063	1.106	1.04236	1.04372
gpi1	SPBC30D10.11	SPBC30D10.11;gpi1	1.16	1.119	0.891	1.06775	1.27085
	SPCC663.11	SPCC663.11	1.05		1.27	0.896352	1.24484
	SPAC23A1.19c	SPAC23A1.19c;SPAC26H5.01c				0.915816	0.965842
ppk24	SPBC21.07c	SPBC21.07c;ppk24				0.88852	1.03178
	SPBC530.13	SPBC530.13				1.22112	1.02014
	SPBC14F5.13c	SPBC14F5.13c	0.872	1.006	0.608	1.24136	1.19461
gpi8	SPCC11E10.02c	SPCC11E10.02c;gpi8			1.002	1.12851	1.20672
	SPBC1773.12	SPBC1773.12				1.90742	1.64889
byr2BF12.02c;byr2;ste8	SPBC1D7.05	SPBC1D7.05;SPBC1D7.05c;SPBC2F12.01;byr2BF12.02c;byr2;ste8			0.998	1.37491	1.41638
	SPBC1773.13	SPBC1773.13			1.2	0.888737	0.866694
	SPBC1773.15	SPBC1773.15	1.247	0.934	0.894	1.19509	0.953041
	SPNCRNA.01	SPNCRNA.01	0.877	0.915	0.849
	SPBC12D12.05c	SPBC12D12.05c	0.974		1.214	0.689154	0.829302
	SPAC29E6.05c	SPAC29E6.05c;SPAC30.09c			1.267	1.48006	1.24274
rad13	SPBC3E7.08c	SPBC3E7.08c;rad13			0.945	0.490044	0.663465
	SPNCRNA.02	SPNCRNA.02
HAG602	SPAC29A4.20	SPAC29A4.20;HAG602	0.915	0.874	0.989	1.07001	1.11558
	SPNCRNA.03	SPNCRNA.03	0.987	0.8	1.059
pnk1	SPAC23C11.04c	SPAC23C11.04c;pnk1			1.312	1.08575	1.21679
	SPNCRNA.04	SPNCRNA.04
	SPAC10F6.10	SPAC10F6.10	1.18	0.928	1.177	0.663625	0.775893
	SPNCRNA.05	SPNCRNA.05
rad17	SPAC14C4.13	SPAC14C4.13;rad17			1.137	0.921017	0.889708
	SPBC25B2.10	SPBC25B2.10	1.164	0.964	0.959	0.738387	1.02056
	SPNCRNA.06	SPNCRNA.06	1.3	1.546	0.781
pof2	SPBC25B2.11	SPBC25B2.11;pof2				0.782508	0.872158
smc6;rad18	SPCC5E4.06	SPCC5E4.06;smc6;rad18	1.078	0.851	1.021	0.900189	0.966593
	SPNCRNA.08	SPNCRNA.08			0.85
	SPNCRNA.09	SPNCRNA.09	1.243	1.383	0.785
pmc5;med6	SPAC1002.15c	SPAC1002.15c;pmc5;med6	1.056	0.849	1.006	0.926601	0.786349
	SPAC10F6.16	SPAC10F6.16	0.959	1.121	0.86	1.09237	0.621952
	SPAC22F3.04	SPAC22F3.04				1	1
	SPCC825.01	SPCC825.01	1.002	0.883	1.015	0.888456	0.830265
	SPBC36.06c	SPBC36.06c	0.976	0.891	1.276	0.878489	1.00989
	SPAC139.01c	SPAC139.01c;SPAC955.02c	0.977	0.877	1.023	0.944019	1.23019
lid2	SPBP19A11.06	SPBC1346.04c;SPBP19A11.06;SPBP4H10.01;lid2	1.104	1.019	1.206	1.06928	1.13138
	SPCC825.02	SPCC825.02	0.993	1.063	1.115	1.10268	1.33185
	SPNCRNA.79	SPNCRNA.79
agn2	SPBC646.06c	SPBC646.06c;agn2	1.25	1.542	1.602	1.5688	1.54983
	SPAC26H5.02c	SPAC26H5.02c			1.109	1.69313	1.89096
mde8;spn7	SPBC19F8.01c	SPBC19F8.01c;SPBC21.08c;mde8;spn7				0.967526	1.18879
	SPBP4H10.07	SPBP4H10.07	1.018	0.994	1.081	1.04597	0.939144
qcr10	SPBP4H10.08	SPBP4H10.08;qcr10	0.975	0.659	1.086	0.858074	0.730484
rad21	SPCC338.17c	SPCC338.17c;rad21	1.976	2.343	2.106	3.58575	3.36224
rad22;rad22A	SPAC30D11.10	SPAC30D11.10;rad22;rad22A	1.056	0.928	0.964	0.618412	0.905958
	SPBC26H8.11c	SPBC26H8.11c	1.665	0.972	2.139	0.798033	0.513098
rad24	SPAC8E11.02c	SPAC8E11.02c;rad24	0.985	1.076	0.909	0.97304	1.00302
	SPAC29E6.06c	SPAC29E6.06c;SPAC30.10c	0.861	1.221	1.033	0.807741	1.06151
rad25	SPAC17A2.13c	SPAC17A2.13c;rad25	1.078	0.815	0.897	1.10396	1.0262
rad26	SPAC9E9.08	SPAC9E9.08;rad26	1.239	0.969	1.265	1.19625	1.16903
tim13	SPAC17C9.09c	SPAC17C9.09c;tim13	1.197	0.786	1.225	1.06663	1.06132
	SPAC1002.16c	SPAC1002.16c	0.997	0.842	1.095	1.1744	2.28616
ptr2;pim1;dcd1	SPBC557.03c	SPBC557.03c;ptr2;pim1;dcd1	0.937	0.756	0.987	0.959023	0.984819
tsc1	SPAC22F3.13	SPAC22F3.13;tsc1	0.992	0.886	0.761	1.03487	1.19234
	SPBP4H10.10	SPBP4H10.10				0.853075	0.665951
oac1	SPAC139.02c	SPAC139.02c;oac1	0.899	1.145	0.921	1.23311	1.15202
	SPNCRNA.124	SPNCRNA.124
	SPBP4H10.12	SPBP4H10.12	0.929	0.827	0.9	0.811871	0.869303
	SPBC646.07c	SPBC646.07c	1.098	1.149	1.041	1.15087	1.17547
	SPBP4H10.15	SPBP4H10.15	0.986	1.318	0.943	1.00815	0.983656
ump1	SPCC14G10.03c	SPCC14G10.03c;ump1	1.044	1.04	0.935	1.01969	0.922479
mre11;rad32	SPAC13C5.07	SPAC13C5.07;mre11;rad32			1.43	1.24497	1.72577
trx2	SPBC12D12.07c	SPBC12D12.07c;trx2	1.07	0.798	1.557	1.31947	1.1145
	SPAC23C11.06c	SPAC23C11.06c				0.26923	0.146741
	SPAPB1E7.11c	SPAPB1E7.11c	0.942		0.989	0.894415	1.08538
	SPAPB1E7.05	SPAPB1E7.05				0.756135	0.767881
	SPAPB1E7.08c	SPAPB1E7.08c	0.975	1.155	0.802	1.1275	0.771453
	SPAC1002.17c	SPAC1002.17c			1.184	0.445572	0.237379
	SPAC144.17c	SPAC144.17c	1.233	0.937	0.951	0.824727	0.807339
	SPAC19G12.13c	SPAC19G12.13c		0.745	1.168	0.797528	0.798069
	SPAC5H10.05c	SPAC5H10.05c	1.095	1.443	1.44	1.59671	1.51006
	SPBC18E5.14c	SPBC18E5.14c	0.874	1	1.049	0.721026	0.920443
pct1;res2;mcs1	SPAC22F3.09c	SPAC22F3.09c;pct1;res2;mcs1	1.175	1.345	1.231	0.81191	0.886901
	SPAC24H6.13	SPAC24H6.13				0.921214	0.866401
	SPCC1620.12c	SPCC1620.12c		1.033	0.95	0.86121	1.11637
wis3;spo12	SPAC3F10.15c	SPAC3F10.15c;wis3;spo12		0.974	0.88	1.06235	1.09723
matmc_2;matmc	SPBC23G7.09	SPBC23G7.09;matmc_2;matmc			0.583
ppe	SPAC31G5.05c	SPAC31G5.05c;ppe	0.867	0.766	0.927	0.973135	0.984117
ogm1;oma1	SPAC22A12.07c	SPAC22A12.07c;ogm1;oma1	0.947	1.026	0.922	0.700652	0.896211
sss1	SPAC4G8.02c	SPAC4G8.02c;sss1	1.095	0.739	1.132	1.01607	1.00973
pmc1	SPBC1A4.10c	SPBC1A4.10c;SPBP23A10.01c;pmc1	1.1	0.883	0.928	1.06466	1.08018
	SPAC750.05c	SPAC750.05c	1.276	1.224	3.151	0.660166	0.608969
	SPBC1773.06c	SPBC1773.06c	1.494	1.402	1.956	1.00074	0.869584
sap145	SPAC22F8.10c	SPAC22F8.10c;sap145	1.031	0.913	1.128	0.879206	0.995338
luc7	SPCC16A11.13	SPCC16A11.13;luc7		0.989	1.08	1.21995	1.3972
adh4	SPAC5H10.06c	SPAC5H10.06c;adh4	0.959	0.97	1.22	0.896132	1.03897
	SPBC4F6.13c	SPBC4F6.13c	0.955	1.069	1.151	0.954444	1.11441
sec71;sec7A;sec7a	SPAC4D7.01c	SPAC4D7.01c;SPAP8A3.15c;sec71;sec7A;sec7a	0.965	1.043	0.921	0.808712	0.934626
sec72;sec702;sec7B;sec7b	SPAC30.01c	SPAC30.01c;sec72;sec702;sec7B;sec7b	0.946	1.103	0.943	0.926087	1.10979
sec7C;sec7c;sec73	SPAC19A8.01c	SPAC19A8.01c;SPAC23H3.01;sec7C;sec7c;sec73	0.961	0.919	0.901	1.1361	0.965389
	SPAC3F10.16c	SPAC3F10.16c	0.967	1.091	1.06	0.755106	1.10283
spf27;cwf7	SPBC28F2.04c	SPBC28F2.04c;spf27;cwf7	1.121	0.988	1.034	0.837739	0.750056
	SPAC22A12.08c	SPAC22A12.08c	1.041	1.054	1.042	1.08501	1.0829
	SPAC4G8.03c	SPAC4G8.03c	1.614	1.146	1.494	1.20311	1.5596
swi5	SPBC409.03	SPBC409.03;swi5	1.207	0.784	0.967	0.702477	0.606583
pmd1	SPCC663.03	SPCC663.03;pmd1	0.87	0.961	1.196	0.745364	0.613651
	SPAC750.06c	SPAC750.06c	1.001	1.172	1.013
dre4;hgp1	SPAC13C5.02	SPAC13C5.02;dre4;hgp1		1.001	0.946	1.13909	1.49265
	SPBC409.08	SPBC409.08	1.101	0.916	1.843	0.871126	0.493817
	SPAC13C5.04	SPAC13C5.04				1.24564	1.42195
vma10	SPBC1289.05c	SPBC1289.05c;vma10	1.104	0.765	0.998	1.03987	1.04502
rep2	SPBC2F12.11c	SPBC2F12.11c;rep2	1.349	1.381	1.799	1.3728	1.50131
bos1	SPAP14E8.03	SPAP14E8.03;bos1			0.718	0.455734	0.383719
	SPAC1399.01c	SPAC1399.01c	0.787	1.027	0.677	1.54423	1.47131
	SPAC1783.01	SPAC1783.01	0.861	0.711	0.787	0.830988	0.778934
sma2;fta2	SPAC1783.03	SPAC1783.03;sma2;fta2	1.241	0.925	0.933	1.08924	1.32961
ade7	SPBC409.10	SPBC409.10;ade7	1.079	0.945	0.842	1.30354	1.18341
fyt1;mal25-1;spi1	SPBC1289.03c	SPBC1289.03c;fyt1;mal25-1;spi1	0.903	1.166	1.123	0.971148	0.988589
	SPBC409.13	SPBC409.13	0.973	0.848	1.138	1.09423	0.980959
	SPBC409.15	SPBC409.15	1.03	0.839	1.181	0.848933	0.892519
wos2	SPAC9E9.13	SPAC9E9.13;wos2	1.159	1.008	0.89	1.20965	1.4798
	SPAC750.07c	SPAC750.07c			1.226	0.650927	0.634618
	SPBC409.18	SPBC409.18	1.031	0.826	0.88	0.924741	0.834204
tim40	SPAC57A10.11c	SPAC57A10.11c;tim40	1.132	1.002	0.926	0.882938	1.08608
	SPBC1289.06c	SPBC1289.06c	1.015	1.079	0.921	1.44248	0.958383
	SPBC1773.08c	SPBC1773.08c			1.052	0.948141	0.751212
pan6	SPAC5H10.08c	SPAC5H10.08c;pan6	1.005	1.376	0.935	0.918577	0.78927
gsa1;gsh2	SPAC3F10.04	SPAC3F10.04;gsa1;gsh2	0.906	1.168	1.09	1.00952	0.998715
	SPAC3C7.01c	SPAC3C7.01c;SPAC732.03c	1.006	1.106	1.025	1.00058	0.978082
	SPBC15C4.06c	SPBC15C4.06c;SPBC21H7.01c				0.555232	0.300417
tef3	SPAC29A4.02c	SPAC29A4.02c;tef3	1.048	0.635	1.14	0.932867	1.01877
tef5	SPCC1450.04	SPCC1450.04;tef5	0.996	1.102	1.062	0.972417	0.95096
uba1;ptr3	SPBC1604.21c	SPBC1604.21C;SPBC211.09;uba1;ptr3	0.927	1.182	0.822	0.912872	1.04514
	SPAC8C9.10c	SPAC8C9.10c	0.956	1.068	1.21	0.772249	0.868894
H3.2;hht2;h3.2	SPBC8D2.04	SPBC8D2.04;H3.2;hht2;h3.2	0.815	0.825	0.869	0.976484	0.831229
cys1a;cys11	SPBC36.04	SPBC36.04;cys1a;cys11	1.06	1.215	0.764	1.20992	1.11714
	SPAC750.08c	SPAC750.08c	1.39	1.321	1.313
tap1;tap11;rif1	SPAC6F6.17	SPAC6F6.17;SPAPJ736.01;tap1;tap11;rif1	0.977	1.028	1.108	0.768206	0.952827
	SPBC36.07	SPBC36.07		1.004	1.055	0.970065	1.33148
rer1	SPAC22E12.05c	SPAC22E12.05c;rer1	1.109	1.202	1.114	1.32462	1.03101
mug184	SPBC1773.09c	SPBC1773.09c;mug184		1.058	1.181	0.450224	0.780412
adg2	SPAC19G12.16c	SPAC19G12.16c;SPAC19G12.17c;SPAC23A1.01c;adg2	0.881	0.978	0.595	1.13625	0.952363
	SPAC5H10.09c	SPAC5H10.09c			0.93	0.844871	1.01658
ero11	SPBC4F6.16c	SPBC4F6.16c;ero11	1.073	0.965	0.743	0.98668	0.970852
mfp1	SPAC3C7.02c	SPAC3C7.02c;mfp1		1.316	0.624	1.02038	0.791797
nup184	SPAP27G11.10c	SPAP27G11.10c;nup184	0.971	0.94	0.872	0.894425	0.906367
rps601;rps6;rps6-1	SPAC13G6.07c	SPAC13G6.07c;rps601;rps6;rps6-1	0.915	1.064	0.954	0.984955	1.00814
	SPCC757.02c	SPCC757.02c	1.06			0.967595	1.06472
ppk4	SPAC167.01	SPAC167.01;ppk4	0.915	1.046	1.005	0.730668	0.824721
trm12	SPAC4G8.06c	SPAC4G8.06c;trm12	1.013	0.541	1.055	0.922047	0.971841
	SPBC36.10	SPBC36.10	0.963	0.439	0.924	0.968319	0.891444
spk1	SPAC31G5.09c	SPAC31G5.09c;spk1	1.111		0.989	0.660326	0.626348
pam17	SPAC167.04	SPAC167.04;pam17	1.295	0.967	1.374	1.00156	0.941447
	SPBC36.11	SPBC36.11		0.958	1.045	1.28295	1.08066
	SPAC167.05	SPAC167.05;SPAC57A7.01	1.039	1.348	0.877	0.991126	0.914328
pi069;flx1	SPBC27B12.09c	SPBC27B12.09c;pi069;flx1	0.92	0.969	0.995	0.849724	0.982367
slm1;cdr2	SPAC57A10.02	SPAC57A10.02;slm1;cdr2	0.99	1.004	0.995	1.08312	0.61311
	SPBPB10D8.02c	SPBPB10D8.02c	2.03	2.864	0.995	3.99114	5.01766
rpl2-3;rpkd4;rpk5-b;rpl803;rpk5b;rpkD4;KD4;rpl8-3	SPBC839.04	SPBC24E9.04;SPBC839.04;rpl2-3;rpkd4;rpk5-b;rpl803;rpk5b;rpkD4;KD4;rpl8-3	0.793	0.712	0.985	0.879902	0.853284
	SPAC1399.04c	SPAC1399.04c	1.086	0.899	1.03	0.968204	0.856378
	SPBC4F6.17c	SPBC4F6.17c	1.14	1.325	0.634	1.69148	2.24669
	SPCC576.02	SPCC576.02	1.359	1.157	1.361	1.36129	1.57921
	SPBC21H7.03c	SPBC21H7.03c	1.182	1.071	1.009	1.14936	1.26017
	SPCC576.04	SPCC576.04	0.989	1.104	1.073	0.959325	0.706506
taf13	SPCC1494.02c	SPCC1494.02c;taf13	0.866	1.01	0.973	1.25143	1.02787
	SPCC576.05	SPCC576.05	1.054	1.482	1.022	0.829622	1.0258
	SPCC757.03c	SPCC757.03c	1.118	1.019	0.723	0.84364	0.68608
	SPAC4G8.07c	SPAC4G8.07c	1.11	1.164	1.093	0.902793	0.974828
	SPAC8C9.12c	SPAC8C9.12c	0.786	0.93	0.901	1.02657	0.908309
pmh1;mcr1	SPBC776.18c	SPBC776.18c;pmh1;mcr1				1.17733	1.51517
cds1	SPCC18B5.11c	SPCC18B5.11c;cds1	1.004	1.031	0.882	0.761081	0.870751
	SPBC342.06c	SPBC342.06c	0.994	0.889	0.786	0.921506	1.44566
dsp1;pmp1	SPBC1685.01	SPBC1685.01;dsp1;pmp1	0.8	1.631	0.761	1.12907	1.09704
eIF4E2;tif452	SPBC1709.18	SPBC1709.18;SPBC409.01;eIF4E2;tif452	1.069	0.957	0.912	1.10063	0.918542
	SPCC24B10.04	SPCC24B10.04	0.884	1.016		1.33597	1.07075
tim9	SPCC24B10.05	SPCC24B10.05;tim9	0.928	1.124	1.185	1.00583	0.936244
	SPCC24B10.06	SPCC24B10.06	0.971	1.164	0.919	0.933756	0.527859
gad8	SPCC24B10.07	SPCC24B10.07;gad8	0.927	0.968	1.06	0.995347	0.954802
vps20	SPBC215.14c	SPBC215.14c;vps20	1.089		0.827	0.964683	0.771384
	SPBC1604.16c	SPBC1604.16c			1.221	1.00272	1
	SPBC1652.01	SPBC1652.01		1.068	0.961	0.789863	0.804572
	SPBC1105.16c	SPBC1105.16c			0.846	1.21228	1.26044
rsm25	SPBC16A3.04	SPBC16A3.04;rsm25	0.872		1.058	1.10362	0.773727
	SPBC16G5.02c	SPBC16G5.02c	1.076	1.08	1.138	1.04065	1.08115
spc24	SPBC336.08	SPBC336.08;spc24	0.986		0.982	0.856643	1.09407
	SPBC16A3.06	SPBC16A3.06	1.002		1.078	0.732765	0.817322
tmp;tmp1	SPCC70.07c	SPCC70.07c;tmp;tmp1	1.08	0.822	0.924	1.64797	1.37351
spp1;pri1	SPAC6B12.10c	SPAC6B12.10c;spp1;pri1	1.112	1.002	1.014	0.968896	1.04861
	SPCC965.14c	SPCC965.14c	1.269	1.346	1.743	2.1688	1.74807
cwf8;prp19	SPAC29A4.08c	SPAC29A4.08c;cwf8;prp19	0.987	1.121	1.029	0.970968	1.04647
cox1	SPMIT.01	SPMIT.01;cox1	1.243	1.152	1.329	0.8568	2.52535
	SPAC212.06c	SPAC212.06c	0.803	1.046	0.911	0.709672	0.625705
csn1;caa1;sgn1	SPBC215.03c	SPBC215.03c;csn1;caa1;sgn1	1.042	1.136	1.008	1.0906	1.23
sgn2;csn2	SPAPB17E12.04c	SPAPB17E12.04c;sgn2;csn2	1.172	0.959	0.848	0.782087	0.947218
csn3	SPAC222.16c	SPAC222.16c;SPAC821.02c;csn3	1.719	0.853	0.978	1.15282	1.06422
grx1	SPAC4F10.20	SPAC4F10.20;grx1	0.93	0.853	0.724	1.22275	1.20666
csn4	SPAC22A12.03c	SPAC22A12.03c;csn4	1.094	0.864	1.015	0.972064	1.03419
csn5	SPAC1687.13c	SPAC1687.13c;csn5	1.022	1.019	1.029	1.384	1.4907
	SPAC23H4.01c	SPAC23H4.01c;SPAP27G11.01	1.062	1.095	0.945	0.832868	1.04768
	SPBC1734.07c	SPBC1734.07c	0.893	1.101	0.964	1.16206	1.15305
	SPCC24B10.12	SPCC24B10.12			1.052	0.753266	0.771713
alp1	SPBC11C11.04c	SPBC11C11.04c;alp1		1.035		0.894672	1.20302
	SPCC584.15c	SPCC584.15c	0.997	1.202	1.15	0.669707	0.569727
	SPCC330.07c	SPCC330.07c	0.884	0.992	0.638	1.57252	1.05348
alp4	SPBC365.15	SPBC365.15;alp4	0.999		0.952	0.789967	0.83289
	SPCC24B10.15	SPCC24B10.15	1.232	1.022	1.214	1.21504	1.21891
alp6	SPBC428.20c	SPBC428.20c;SPBC902.01c;alp6			1.155	1.22361	1.62911
alp7;mia1	SPAC890.02c	SPAC890.02c;alp7;mia1	1.089	0.771	0.962	0.996216	0.872997
	SPCC24B10.18	SPCC24B10.18	0.939	0.952	1.149	0.996446	0.846843
btb2	SPBC25B2.06c	SPBC25B2.06c;btb2	1.025	0.762	0.995	0.973508	1.18022
	SPBC16A3.10	SPBC16A3.10	1.036	1.14	1.029	0.799043	0.893657
	SPBC1604.17c	SPBC1604.17c	1.027	1.072	1.037	0.711557	0.972679
rpl20-1;rpl20;rpl18a-2;rpl2001;yl17b	SPAC3A12.10	SPAC3A12.10;rpl20-1;rpl20;rpl18a-2;rpl2001;yl17b	1.006	1.054	0.93	0.948621	0.987536
	SPAC10F6.07c	SPAC10F6.07c	1.066		1.096	0.707838	0.885902
rpl2002;rpl20;rpl18a;rpl20-2;rpl18a-1	SPAC26A3.04	SPAC26A3.04;rpl2002;rpl20;rpl18a;rpl20-2;rpl18a-1	0.953	1.01	0.97	0.985791	0.956765
esc1	SPAC56F8.16	SPAC56F8.16;esc1			0.726	1.05061	0.596141
	SPBC3B9.08c	SPBC3B9.08c	1.013	0.84	1.091	0.987409	0.89161
	SPBC428.04	SPBC428.04	0.979	0.799	1.008	1.15483	0.982842
	SPBC16A3.14	SPBC16A3.14	0.939	1.134	1.075	0.877022	0.909742
	SPBC21C3.02c	SPBC21C3.02c	1.045	0.853	0.962	1.67129	0.823918
cwc27	SPBC16A3.16	SPBC16A3.16;cwc27	1.244		1.115	1.01141	1.00177
	SPAC29A4.19c	SPAC29A4.19c	1.171	1.173	1.118	1.03285	1.12129
sma6;fta4	SPCC1393.04	SPCC1393.04;sma6;fta4			1.221	1.22348	1.34858
	SPBC16A3.18	SPBC16A3.18	0.969	1.162	1.012	1.2112	0.878241
	SPCC1393.05	SPCC1393.05			0.837	1.01199	1.10901
	SPBC16A3.19	SPBC16A3.19			0.938	0.797917	1.00321
rpl11-3;mrpl19	SPAC1486.07c	SPAC1486.07c;rpl11-3;mrpl19	1.183	0.848	1.138	1.07629	1.01704
	SPBP35G2.02	SPBP35G2.02	1.087		1.006	1.15207	1.13732
	SPCC1393.08	SPCC1393.08	1.127		0.689	0.910824	0.689438
	SPAC212.07c	SPAC212.07c			0.854	1	1
U1-C	SPBP35G2.09	SPBP35G2.09;U1-C		1.582	0.975	1.22	1.14512
nuf2	SPAC27F1.04c	SPAC27F1.04c;nuf2		1.086	0.99	1.02898	1.28402
	SPAC821.03c	SPAC821.03c	0.976	1.096	0.883	1.0436	1.01803
	SPCC24B10.20	SPCC24B10.20	1.134		1.308	0.580995	1.38703
eIF4G;tif471	SPAC17C9.03	SPAC17C9.03;eIF4G;tif471	0.905	0.985	0.963	0.919895	1.06177
	SPCC584.16c	SPAC8A4.14c;SPCC584.16c			1.18	0.675475	0.218216
	SPAC977.05c	SPAC977.05c				1	1
	SPBC25B2.07c	SPBC25B2.07c	1.013	0.932	0.948	1.22117	1.45899
	SPBC428.10	SPBC428.10			1.19	0.658613	0.558067
	SPBC428.11	SPBC428.11				3.8442	5.05755
	SPBC1604.18c	SPBC1604.18c				0.956159	1.53201
	SPAC10F6.08c	SPAC10F6.08c	1.01	0.846	0.795	0.418683	0.627866
	SPBC428.14	SPBC428.14	1.067	0.866	0.978	1.05229	1.05229
	SPBC428.15	SPBC428.15	1.044	1.346	1.14	1.05213	1.07841
	SPCC1393.11	SPCC1393.11	0.988	1.013	1.021	0.496144	0.449735
	SPAC11E3.01c	SPAC11E3.01c;SPAC2H10.03c			0.967	0.809931	0.962436
	SPCC1393.12	SPCC1393.12	0.975	0.974	1.063	0.667145	0.645758
	SPCC1393.13	SPCC1393.13	0.911	0.948	0.797	1.43532	0.909763
	SPBP35G2.10	SPBP35G2.10			1.153	1.16931	1.55447
	SPBP35G2.12	SPBP35G2.12	1.271	0.925	1.069	1.13691	1.19425
U1-A	SPBC4B4.07c	SPBC4B4.07c;U1-A	1.011	0.891	0.978	1.01199	1.11939
	SPBP35G2.14	SPBP35G2.14	1.063	0.984	0.948	0.761455	0.889251
	SPBC337.02c	SPBC337.02c	0.935	0.948	1.019	0.631998	0.865911
	SPAC212.08c	SPAC212.08c			1.238	0.937221	0.937221
	SPBC1703.01c	SPBC1703.01c;SPBP4H10.22c	0.966	1.273	1.084	1.20972	1.24067
	SPCC576.12c	SPCC576.12c	0.985	0.874	1.018	1.06071	0.796463
	SPAC1F8.02c	SPAC1F8.02c				1	1
pms1	SPAC19G12.02c	SPAC19G12.02c;pms1		1.22	1.071	0.955978	1.25065
hut1	SPBC839.11c	SPBC24E9.11c;SPBC839.11c;hut1	1.072	0.965	1.168	1.12335	1.13713
	SPBC1604.19c	SPBC1604.19c	0.929	0.895	0.935	1.01365	0.979367
	SPBC13G1.02	SPBC13G1.02	0.957	1.106	1.02	0.941404	0.951539
	SPCC550.01c	SPCC550.01c	1.012	0.982	1.104	0.890661	1.14503
	SPBC13G1.05	SPBC13G1.05				0.794259	0.877516
	SPBC16G5.05c	SPBC16G5.05c	0.992	0.953	0.998	1.04156	0.903807
	SPBC21C3.04c	SPBC21C3.04c	1.038	0.817	1.073	0.944566	1.00147
	SPBC13G1.07	SPBC13G1.07	1.004	0.918	0.942	1.01622	1.01073
	SPAC11E3.02c	SPAC11E3.02c	1.151		0.942	0.819917	0.807796
	SPBC13G1.09	SPBC13G1.09	0.839	1.022	1.171	0.967297	0.946832
ght7	SPBC1348.14c	SPAC1348.14;SPAC1348.14c;SPAP8B6.01c;SPAPB8B6.01c;SPBC1348.14c;SPBPB8B6.01c;ght7				0.894564	0.894564
sin1	SPAPYUG7.02c	SPAPYUG7.02c;sin1	0.972	1.089	1.004	0.889863	0.937346
	SPAC212.09c	SPAC212.09c	1.548	1.28	1.131	1.19232	1.01973
psu1;sui1;tif1;tif38	SPBC23G7.05	SPBC23G7.05;psu1;sui1;tif1;tif38	1.084	0.986	1.064	0.929036	1.17444
	SPBC577.06c	SPBC577.06c	0.897	1.087	0.872	1.00757	0.967511
	SPBC1348.11	SPAC1348.11;SPBC1348.11				1.91027	1.13149
	SPBC1348.12	SPAC1348.12;SPBC1348.12	0.815	0.606	0.939	1.51622	1.3184
	SPBC1348.13	SPAC1348.13;SPBC1348.13	1.363	1.322	1.732	1	1
	SPAC23D3.01	SPAC23D3.01		1.186	0.984	0.983257	1.07103
	SPAPB2C8.01	SPAPB2C8.01	0.9	1.475	1.014	0.989704	1.17298
	SPAC17H9.03c	SPAC17H9.03c	1	1.08	1.198	1.16228	1.10446
	SPCC70.09c	SPCC70.09c			1.173	1.71923	1.89585
mcm6;mis5	SPBC211.04c	SPBC211.04c;mcm6;mis5	0.98	1.082	0.992	1.01036	0.970184
ubp26;ubp7	SPAC23G3.08c	SPAC23G3.08c;ubp26;ubp7	1.028	0.799	1.06	0.854766	0.785604
	SPAC12G12.16c	SPAC12G12.16c;SPAC18B11.01c				1.22611	1.33846
	SPCC569.02c	SPCC569.02c	1.065	1.079	1.018	0.99489	0.99489
	SPAC17H9.04c	SPAC17H9.04c	0.893	0.925	1.089	1.00989	0.944226
	SPAC12B10.08c	SPAC12B10.08c			1.006	0.955936	0.969498
ubc3;ubcP3;ubcp3	SPBP16F5.04	SPBP16F5.04;ubc3;ubcP3;ubcp3	1	1.015	0.915	1.10582	0.841529
	SPAC8E11.04c	SPAC8E11.04c	1.026	1.17	1.211	1.03442	0.962205
	SPBC16E9.14c	SPBC16E9.14c	1.035	1.133	0.995	1.12809	1.31392
	SPAC664.03	SPAC664.03	0.941	1.11	1.029	1.09961	1.09511
	SPCC1672.03c	SPCC1672.03c	1.143	1.047	0.819	0.935209	1.10395
ggt1	SPAC664.09	SPAC664.09;ggt1	1.045	0.815	1.176	1.08732	1.21252
	SPCC1919.02	SPCC1919.02				0.917583	1.07898
	SPCC1919.04	SPCC1919.04	1.163	1.092	0.896	1.20853	0.685038
	SPCC1919.05	SPCC1919.05	1.036	0.99	1.105	1.03313	1.1722
	SPCC1919.07	SPCC1919.07			0.911	0.972514	1.24246
	SPBC577.08c	SPBC577.08c		1.65	0.98	1.2109	1.00762
	SPAC4H3.11c	SPAC4H3.11c	0.994	0.906	0.807	1.12348	1.00648
	SPCC24B10.19c	SPCC24B10.19c	1.027	1.089		0.710704	1.34971
	SPBC1A4.11c	SPBC1A4.09c;SPBC1A4.11c	0.777	1.03	1.004	1.28929	0.927974
spc25	SPCC188.04c	SPAC1B9.05c;SPCC188.04c;spc25			1.016	0.853543	0.965827
rpl41-1;rpl4101	SPAC3G6.13c	SPAC3G6.13c;rpl41-1;rpl4101	0.895	0.943	0.962	0.831483	0.851293
rpl4102;rpl41;rpl41-2;rpl41-2B.01c	SPAC3F10.18c	SPAC3F10.18c;SPAC8F11.01c;rpl4102;rpl41;rpl41-2;rpl41-2B.01c	0.916	0.384	1.008	0.943168	1.01633
fba1	SPBC19C2.07	SPBC19C2.07;fba1	1.065	1.093	0.899	0.967012	1.08551
	SPBC1271.10c	SPBC1271.10c	1.256	0.982	1.298	0.684855	0.737215
klp2	SPAC664.10	SPAC664.10;klp2	0.864	0.841	0.958	0.771944	1.09447
	SPAC8E11.05c	SPAC8E11.05c	1.023	0.984	0.942	1.02204	1.02545
	SPBC16C6.12c	SPBC16C6.12c	0.979	1.13	1.27	0.925004	0.875538
	SPAP14E8.05c	SPAP14E8.05c	1.346	1.075	0.94	1.1522	0.863304
	SPAC664.13	SPAC664.13		1.37	1.04	1.16972	1.08912
	SPAC664.14	SPAC664.14				0.779317	0.86751
	SPCC1672.04c	SPCC1672.04c			1.149	0.617881	0.708973
	SPCC417.03	SPCC417.03				1.18885	1.18885
	SPCC417.04	SPCC417.04				1.02213	1
	SPCC1919.11	SPCC1919.11				0.983441	0.983441
rga1	SPBC3F6.05	SPBC3F6.05;rga1			0.826	1.03844	0.9653
	SPBC32H8.05	SPBC32H8.05;NULL_SPBC32H8.06	0.919	0.756	1.325	1.10989	1.06429
	SPAC6C3.06c	SPAC6C3.06c	0.927	1.036	0.95	0.927238	1.1016
ef-3;tef3	SPCC417.08	SPCC417.08;ef-3;tef3	0.915	1.197	0.947	0.889186	0.955314
isy1;cwf12	SPBC32F12.05c	SPBC32F12.05c;isy1;cwf12	1.083	1.208	1.08	1.04048	1.43837
tup1;tup12	SPAC630.14c	SPAC630.14c;tup1;tup12	0.91	0.985	0.921	1.10193	0.850633
scn1	SPAC688.13	SPAC688.13;scn1				1.16794	1.0346
	SPAC1527.03	SPAC1527.03	1.055	0.988	1.071	1.07827	0.892217
	SPCC1020.11c	SPCC1020.11c	0.947	1.079	0.853	1.14541	1
	SPBC27.04	SPBC27.04	0.958	1.383	0.832	0.790898	0.845644
	SPBC660.17c	SPBC660.17c			0.779	0.817085	0.918498
	SPBC27.05	SPBC27.05	1.013	1.099	0.929	0.636387	0.815457
tif5;eif5	SPAC2F7.05c	SPAC2F7.05c;tif5;eif5	1.122	1.103	1.162	0.705551	0.737397
	SPAC4H3.12c	SPAC4H3.12c				1.00353	1
	SPCC11E10.01	SPCC11E10.01;SPCC61.06	0.961	1.077	0.978	1.1081	1.10359
	SPAC664.02c	SPAC664.02c	0.943	1.16	1.067	1.13412	1.18045
mug1	SPCC11E10.03	SPCC11E10.03;mug1	0.867	0.627		1.10263	1.49053
	SPCC11E10.04	SPCC11E10.04		1.079	1.007	0.868386	0.916787
	SPAC17H9.06c	SPAC17H9.06c	1.229	0.968	1.029	0.68712	0.521864
rps15-1;rps1501	SPCC1393.03	SPCC1393.03;rps15-1;rps1501	0.872	0.938	0.971	0.962173	0.9854
rps15-2;rps15;rps1502;rps15-3	SPAC1071.07c	SPAC1071.07c;rps15-2;rps15;rps1502;rps15-3	0.914	1.091	0.933	0.997743	0.972951
nut2;med10	SPBC31F10.09c	SPBC31F10.09c;nut2;med10	0.967		1.367	1.07115	1.02137
nup107	SPBC428.01c	SPAC19G10.01;SPBC428.01c;SPBC582.11c;nup107	1.027	0.998	0.993	0.955835	0.947972
	SPBC16E9.16c	SPBC16E9.16c		1.356	1.065	0.666649	0.503235
	SPCC417.10	SPCC417.10	1.062	1.236	1.186	0.91673	0.736383
	SPCC1672.05c	SPCC1672.05c	0.909	1.276	0.926	0.921271	0.95527
	SPCC417.12	SPCC417.12				1.01122	1
cal1;cnx1	SPAC3C7.11c	SPAC3C7.11c;cal1;cnx1	0.931	1.026	0.898	1.06486	1.14215
	SPAC1002.01	SPAC1002.01;SPAC1610.05	0.976	1.079	1.411	0.931574	0.819495
	SPCC569.05c	SPCC569.05c	0.889	0.902	0.805	1.47827	2.25915
	SPAC1002.02	SPAC1002.02	1.13	0.865	1.276	1.12145	1.04779
	SPCC1020.12c	SPCC1020.12c;SPCC14G10.06		0.733		1.08542	1.05795
pol4;Pol-mu	SPAC2F7.06c	SPAC2F7.06c;pol4;Pol-mu			0.944	1	1
sf1;bbp;bpb1	SPCC962.06c	SPCC962.06c;sf1;bbp;bpb1	0.89	1.171	1.017	0.87964	0.782456
sen15	SPAC959.10	SPAC959.10;sen15				1.26072	1.30643
	SPCC4F11.03c	SPCC4F11.03c	1.041	1.184	0.971	0.598806	0.585709
agn1	SPAC14C4.09	SPAC14C4.09;agn1	0.735	0.683	0.609	0.95473	0.704583
asp1	SPCC1672.06c	SPCC1672.06c;asp1	0.981	0.924	0.886	0.664459	1.15593
fim1	SPBC1778.06c	SPBC1778.06c;fim1	1.094	1.34	0.974	0.937757	0.968323
	SPBPB8B6.05c	SPAP8B6.05c;SPAPB8B6.05c;SPBPB8B6.05c				1.0243	1.17352
uap56	SPAC17G6.14c	SPAC17G6.14c;uap56	0.919	1.164	0.971	0.976145	1.00975
dpm3	SPBC1677.02	SPBC1677.02;dpm3	0.959	0.987	1.07	0.780099	0.797515
	SPBPB8B6.03	SPAP8B6.03;SPAPB8B6.03;SPBPB8B6.03	1.758	1.44	1.708	1.56873	0.931745
grt1	SPBPB8B6.04c	SPAP8B6.04c;SPAPB8B6.04c;SPBPB8B6.04c;grt1				1.23108	1.00005
	SPBPB8B6.02c	SPAP8B6.02c;SPAPB8B6.02c;SPBPB8B6.02c				1.04942	1
	SPAC1782.02c	SPAC1782.02c	1.023	0.825	1.122	0.993112	1.01834
glo1	SPBC12C2.12c	SPBC12C2.12c;SPBC21D10.03c;glo1	0.984	0.755	0.716	0.892733	0.974958
eno102;eno1;SPAPB8B6.07c	SPBPB21E7.01c	SPAP8B6.07c;SPAPB21E7.01c;SPBPB21E7.01c;SPBPB8B6.07c;eno102;eno1;SPAPB8B6.07c				1.43597	1.42448
gaa1	SPAC1002.11	SPAC1002.11;gaa1		0.929	0.831	0.964536	0.971601
	SPCC1020.13c	SPCC1020.13c;SPCC14G10.05	1.045	1.588	1.245	0.746008	0.419586
itt1	SPAC1002.14	SPAC1002.14;itt1	0.851	1.123	1.262	1.09946	0.94368
cps3;scp3	SPAC3A11.02	SPAC3A11.02;cps3;scp3	0.933	1.096	1.003	1.0789	1.16163
	SPAC2F7.07c	SPAC2F7.07c	1.021	1.203	1.026	1.01489	0.894972
str3	SPAC1F8.03c	SPAC1F8.03c;str3	0.173		0.314	1	1
pmt1	SPBC19C2.02	SPBC19C2.02;pmt1	1.218	1.142	0.984	0.955081	1.23217
	SPAC977.07c	SPAC977.07c				1.49306	1.32279
pmt2	SPAC1687.11	SPAC1687.11;pmt2	0.914	1.025	1.185	0.765304	0.905132
	SPBC25B2.09c	SPBC25B2.09c	0.999	1.125	1.057	0.903262	1.08702
	SPBC36B7.05c	SPBC36B7.05c	0.985	0.874	0.837	0.954492	0.865003
	SPBC1D7.01	SPBC1D7.01;SPBC1D7.01c	1.091	0.889	1.133	1.03711	1.04305
	SPAC186.01	SPAC186.01			1.068	0.717377	0.294029
sxa1	SPAC26A3.01	SPAC26A3.01;SPAC2E1P5.06;sxa1	0.918	0.941	0.921	0.731099	0.650665
did2	SPBC13G1.12	SPBC13G1.12;did2	1.234	1.229	1.106	0.934452	0.799376
sxa2	SPAC1296.03c	SPAC1296.03c;sxa2		1.27	1.191	0.832723	1.28871
	SPAC186.03	SPAC186.03	1.229	1.179	0.808	1.23309	1.13048
	SPBC1D7.03	SPBC1D7.03;SPBC1D7.03c	0.983	0.986	0.863	0.964046	0.637764
	SPAC186.06	SPAC186.06				1	1.00066
dad4	SPBC3B9.22c	SPBC3B9.22c;dad4
	SPAC186.09	SPAC186.09				1	1
	SPAC1296.04	SPAC1296.04	1.041		0.878	0.989575	1.2323
	SPAC1296.06	SPAC1296.06	1.036	0.886	1.042	1.21297	1.20928
yth1	SPAC227.08c	SPAC227.08c;yth1	0.948	0.98	0.92	1.0529	0.867542
	SPAC6B12.14c	SPAC6B12.14c	0.97	0.633	0.841	0.938783	1.07027
	SPAC3H1.02c	SPAC3H1.02c		0.794		0.879854	1.20772
rpl4-2;rpl4;rpl402	SPBP8B7.03c	SPBP8B7.03c;rpl4-2;rpl4;rpl402	0.899	1.238	0.88	0.943026	0.989935
	SPBC1703.03c	SPBC1703.03c	0.901	0.858	1.004	1.03793	1.11347
pfk1	SPBC16H5.02	SPBC16H5.02;pfk1	1.058	1.48	0.961	1.07147	1.04256
	SPCC553.11c	SPCC553.11c	0.918	1.206	0.928	0.922199	0.62461
	SPAC23H4.05c	SPAC23H4.05c				1	1
	SPAC1F8.04c	SPAC1F8.04c				1.15165	1.07037
	SPAC607.04	SPAC607.04	1.197	0.816	1.13	1.23569	1.32816
	SPCC4B3.07	SPCC4B3.07	0.972	1.238	1.145	1.09766	1.04252
	SPAC19A8.11c	SPAC19A8.11c	1.138	1.024	1.039	1.01756	1.26229
	SPCC4B3.08	SPCC4B3.08		0.985	1.273	1.1027	1.35118
	SPBC36B7.06c	SPBC36B7.06c				1.30006	1.24194
zds1	SPAC31F12.01	SPAC31F12.01;SPAC637.14;zds1	1.012	1.161		0.746893	0.874587
	SPCC550.03c	SPCC550.03c				0.915825	1.13848
	SPBC16G5.07c	SPBC16G5.07c	1.065	1.093	0.94	0.883597	0.973657
rpa1;rpa190;nuc1	SPBC4C3.05c	SPBC4C3.05c;rpa1;rpa190;nuc1	0.912	1.086	1.21	0.885212	1.13619
	SPCC24B10.02c	SPCC24B10.02c			1.061	0.981425	0.954051
cda1	SPAC19G12.03	SPAC19G12.03;cda1	1.047	0.947	0.855	1.00983	0.927137
	SPAC19G12.04	SPAC19G12.04			1.154	1.54214	1.28676
	SPAC19G12.05	SPAC19G12.05		0.944	1.016	0.942867	0.821751
moc3	SPAC821.07c	SPAC821.07c;moc3	1.07	0.925	0.967	0.818858	0.941459
	SPAC19G12.08	SPAC19G12.08				0.837163	0.565684
	SPAC19G12.09	SPAC19G12.09	0.946	0.625	0.706	0.55776	0.397844
set9	SPCC4B3.12	SPCC4B3.12;set9				0.47783	0.477359
	SPBC1711.09c	SPBC1711.09c	1.034	0.978	0.971	0.886965	0.933943
spo3	SPAC607.10	SPAC607.10;spo3		1.16	1.005	0.882637	0.915611
	SPCC4B3.13	SPCC4B3.13	1.133	1.1	1.093	0.938965	0.917407
hob1	SPBC21D10.12	SPBC21D10.12;hob1	1.093	0.983	0.896	1.01343	0.92341
cwf20	SPCC4B3.14	SPCC4B3.14;cwf20			1.068	1.36839	1.46309
	SPBC15C4.04c	SPBC15C4.04c	0.92	1.018	1.097	0.922695	0.889807
hob3	SPBC725.09c	SPBC725.09c;hob3	1.031	0.814	0.844	1.0922	0.939477
	SPBC215.01	SPBC215.01;SPBC3B9.20	0.959	1.475	1.108	0.757567	0.742278
	SPAC977.09c	SPAC977.09c	1.021	1.18	1.566	0.97906	1.12238
	SPCC4B3.16	SPCC4B3.16	1.235		1.081	1.05846	1.25028
bob1;gim5	SPBC215.02	SPBC215.02;bob1;gim5	1.159	0.903	0.744	1.26303	1.39414
cbp3	SPCC4B3.17	SPCC4B3.17;cbp3	0.924	0.999	1.115	0.820848	0.812835
rpk5a;rpl8-1;rpl2-1;rpk5;rpl18;rpl801	SPAC1F7.13c	SPAC1F7.13c;SPAC21E11.02c;rpk5a;rpl8-1;rpl2-1;rpk5;rpl18;rpl801	0.862	1.204	0.993	0.960071	0.981375
	SPCC1322.05c	SPCC1322.05c	1.039	0.788	0.867	0.998482	1
	SPCC4B3.18	SPCC4B3.18	1.171	1.872	1.355	1.29672	1.31725
	SPBC839.14c	SPBC24E9.14c;SPBC839.14c	1.133	1.051	1.223	0.834166	0.96136
	SPAPB8E5.04c	SPAPB8E5.04c	1.022	0.867	1.04	0.669996	0.659816
pmp20	SPCC330.06c	SPCC330.06c;pmp20	1.111	1.229	0.574	1.69246	1.62871
mdm12	SPBC28F2.06c	SPBC28F2.06c;mdm12		1.052	1.198	0.92809	1.27926
gpi2	SPCC550.04c	SPCC550.04c;gpi2	0.977	0.81	1.075	0.979911	0.780746
	SPBC21C3.07c	SPBC21C3.07c	1.057	1.009	1.182	1.0617	1.03155
	SPBC56F2.05c	SPBC56F2.05c	1.109		1.248	0.894508	0.599476
dhp1	SPAC26A3.12c	SPAC26A3.12c;dhp1	0.903	0.906	0.935	0.855172	0.979322
mdm31	SPAC3H1.04c	SPAC3H1.04c;mdm31	0.895		0.95	0.739893	0.743041
	SPAC19G12.11	SPAC19G12.11	1.141	0.787	1.098	0.817831	0.85938
dlp1;coq1	SPAC19G12.12	SPAC19G12.12;dlp1;coq1	0.99	1.007	1.058	1.00554	0.950774
cwf15	SPBC337.06c	SPBC337.06c;cwf15	1.057	0.89	0.948	0.769944	0.872052
	SPCC757.04	SPCC757.04	0.953	1.161	0.989	0.941407	1.02274
	SPCC757.06	SPCC757.06		0.923	1.027	1.56688	1.044
	SPCC757.08	SPCC757.08	1.033	0.921	1.154	1.03763	1.01838
	SPBC215.10	SPBC215.10	0.938	1.007	1	0.985695	1.1457
	SPBC215.13	SPBC215.13	1.155	0.882	0.924	1.20436	0.832802
rhp18;rad6	SPBC1734.06	SPBC1734.06;rhp18;rad6	1.032	0.921		0.957986	1.08341
	SPBC36B7.08c	SPBC36B7.08c	0.976	1.088	0.959	0.78984	0.964298
	SPBC1734.08	SPBC1734.08		1.017	1.08	0.960077	0.814776
	SPBC1734.09	SPBC1734.09	0.984	1.186	1.136	0.871375	1.06313
rim1	SPAC2F3.04c	SPAC2F3.04c;rim1	1.13	0.789	0.897	1.25043	1.0312
	SPBC21C3.08c	SPBC21C3.08c	1.823	1.523	0.753	0.932453	1.1452
sbh1;sbh2	SPBC2G2.03c	SPBC2G2.03c;sbh1;sbh2	1.057	0.778	1.028	1.01882	0.924588
	SPBC337.07c	SPBC337.07c	0.998	0.918	0.859	0.931515	0.945392
vph2	SPCC757.10	SPCC757.10;vph2	1.097		0.963	1.32604	1.22583
	SPBC530.11c	SPBC530.11c		0.986		1.4249	1.0484
	SPCC576.17c	SPCC576.17c				0.636171	0.562825
	SPCC757.12	SPCC757.12	0.987	1.012	0.947	0.988116	0.906391
	SPCC757.13	SPCC757.13				1.25406	1.16114
	SPCC613.01	SPBC757.14;SPCC613.01;SPCC757.14	0.979	1.273	1.201	1.27216	1.43358
	SPBC365.01	SPBC365.01	1.275	0.974	1.157	1.09603	1.04199
spj1	SPBC1734.11	SPBC1734.11;spj1	0.883	1.009	0.766	1.1416	1.17041
	SPAC1F8.07c	SPAC1F8.07c	0.766	0.903	0.703	0.987223	1.03701
atp3	SPBC1734.13	SPBC1734.13;atp3		0.975		0.834376	0.849488
	SPCC1322.07c	SPCC1322.07c				5.18869	4.68537
seh1	SPAC15F9.02	SPAC15F9.02;seh1				0.770827	0.940572
	SPAC4F10.10c	SPAC4F10.10c	0.884	0.899	0.844	0.626909	0.74853
rfc1	SPBC23E6.07c	SPBC23E6.07c;rfc1	1.055	0.859		1.02213	1.24684
	SPAC2F3.05c	SPAC2F3.05c	1.206		0.836	1.07945	1.07501
rfc2	SPAC23D3.02	SPAC23D3.02;rfc2	0.924	0.949	0.978	1.22363	1.2027
	SPAC1002.18	SPAC1002.18	0.903	1.212	1.17	0.759281	0.778204
	SPAC1002.19	SPAC1002.19			1.473	0.350216	0.211077
	SPAC4H3.14c	SPAC4H3.14c	0.914	0.905	0.995	0.877581	1.10108
pub2	SPAC1805.15c	SPAC1805.15c;pub2			0.996	0.791924	0.94614
	SPAC3H5.08c	SPAC3H5.08c	1.063	1.004	1.04	0.842225	0.887807
	SPAC18G6.01c	SPAC18G6.01c	1.176	0.886	1.05	1.03892	1.09238
	SPCC4F11.04c	SPCC4F11.04c	1.094	0.913	0.87	0.166873	0.123111
	SPBC16A3.12c	SPBC16A3.12c	0.971	1.296	0.988	1.01712	1.01737
sod2	SPAC977.10	SPAC977.10;sod2	0.859	1.156	1.054	0.678996	0.880718
fin1	SPAC19E9.02	SPAC19E9.02;fin1	1.016	1.083	0.889	0.884264	0.942918
	SPAC1002.20	SPAC1002.20	0.89			0.824475	0.788
	SPAC1002.21	SPAC1002.21				1	1
dbp2	SPBP8B7.16c	SPBP8B7.16c;dbp2	0.888	1.133	1.745	0.715172	0.757252
dpb4	SPBC3D6.09	SPBC3D6.09;dpb4	1.159	0.968	1.015	1.22919	1.43208
snf5	SPAC2F7.08c	SPAC2F7.08c;snf5	0.98	0.912	0.89	0.567397	1.06281
rga2	SPAC26A3.09c	SPAC26A3.09c;rga2	0.919	0.811	0.912	0.918596	0.684379
	SPAC1805.16c	SPAC1805.16c	1.123	1.004	1.012	0.866021	0.971357
ubp5;ubp22	SPCC188.08c	SPAC1B9.09c;SPAC1B9.10c;SPAC8A4.01c;SPCC188.08c;ubp5;ubp22	1.034	1.295	1.121	1.22905	1.47228
cuf2	SPCC584.02	SPCC584.02;cuf2	1.096		0.832	1	1
	SPAC3H5.09c	SPAC3H5.09c	1.127	1.007	0.997	0.944983	0.857737
matmc_1;matmc;mat1-Mc;mat1-M;matMc;matM	SPBC1711.02	SPBC1711.02;matmc_1;matmc;mat1-Mc;mat1-M;matMc;matM			0.311	0.01	0.01
spn6	SPCC188.12	SPAC8A4.07;SPCC188.12;SPCC584.09;spn6				0.996758	1.30462
wsh3;tea4	SPBC1706.01	SPBC1706.01;wsh3;tea4				1.03021	1.35159
	SPCC61.03	SPCC61.03		1.262	0.939	0.861072	0.887686
	SPCC61.05	SPCC61.05	1.074	1.241	1.125	1.52972	0.992786
	SPAC644.11c	SPAC644.11c	0.979	0.924	1.063	1.05728	1.02651
fio1	SPAC1F7.08	SPAC1F7.08;fio1				1.35454	1.23721
	SPBC12C2.14c	SPBC12C2.14c				1	1
scr1	SPBC1D7.02c	SPBC1D7.02;SPBC1D7.02C;scr1	1.058	0.853		0.957906	0.637062
ste3;ste1;byr1	SPAC1D4.13	SPAC1D4.13;ste3;ste1;byr1			0.906	0.402129	0.331254
	SPAC2F7.09c	SPAC2F7.09c	1.165	1.088	1.026	1.00615	1.06466
rpn502;rpn5-b;rpn5	SPAPB8E5.02c	SPAPB8E5.02c;rpn502;rpn5-b;rpn5	1.136	1	0.884
	SPCC188.09c	SPAC8A4.02c;SPCC188.09c	0.99	1.06	0.951	0.886832	0.762733
	SPCC584.12	SPAC8A4.10;SPCC584.12			0.886	0.794805	1.04189
	SPCC584.13	SPAC8A4.11;SPCC584.13	1.005	1.102	1.199	1.30003	1.04332
	SPCC584.14	SPAC8A4.12;SPCC584.14	0.982	1.396	1.122	0.883553	1.05991
	SPBC1271.15c	SPBC1271.15c	1.494	1.243	1.199	0.820906	0.845164
	SPBC405.02c	SPBC405.02c;SPBC4C3.01	1.043	0.75	1.002	0.839398	0.986276
	SPBC337.03	SPBC337.03			1.024	1.34211	0.983408
	SPBC428.05c	SPBC428.05c	0.965	1.16	0.753	1.12013	1.22086
ppk27	SPBC337.04	SPBC337.04;ppk27	1.083	0.881	0.896	0.862533	0.890255
	SPBC3E7.11c	SPBC3E7.11c			0.985	0.960829	1.20526
fip1	SPAC1F7.07c	SPAC1F7.07c;fip1	0.603	0.979	0.503	1.18771	0.894434
smf2;spc2;wis1	SPBC409.07c	SPBC409.07c;smf2;spc2;wis1	0.878	0.991	0.909	0.930149	0.698442
erg28	SPBC337.09	SPBC337.09;erg28	0.969	0.806	1.047	1.15106	1.05293
dbr1	SPAC17A5.02c	SPAC17A5.02c;dbr1	0.977		0.944	1.10971	1.11629
	SPCC613.02	SPCC613.02	0.941	1.069	1.109	1.11645	0.968953
	SPCC613.03	SPCC613.03	1.022	0.858	0.902	0.653656	0.568324
	SPCC613.07	SPCC613.07		0.886	0.942	1.12234	1.31035
trs20	SPBC11G11.04	SPBC11G11.04;trs20			1.078	1.3062	1.27946
gti1	SPAC1751.01c	SPAC1751.01c;gti1			0.864	1.60392	1.42227
	SPCC613.08	SPCC613.08	1.039	0.825	1.284	0.958166	1.05483
	SPCC613.09	SPCC613.09	1.006	1.013	1.053	0.977814	0.966069
	SPBC18A7.01	SPBC18A7.01;SPBC4F6.19c	1.121			1.18654	1.33252
mac1	SPAC13G7.04c	SPAC13G7.04c;mac1	0.953	0.917	0.809	0.941156	0.830858
	SPNCRNA.128	SPNCRNA.128	1.022	0.765	0.992
uch1	SPAC27F1.03c	SPAC27F1.03c;uch1	1.023	1.02	1.212	0.844717	0.64976
mde9;meu28;spn5	SPAC24C9.15c	SPAC24C9.15c;mde9;meu28;spn5	0.999		1.093	2.51687	3.02776
pkc1;pck2;sts6	SPBC12D12.04c	SPBC12D12.04c;pkc1;pck2;sts6			0.93	0.792752	0.99114
	SPBC337.11	SPBC337.11				0.861369	0.924131
uch2	SPBC409.06	SPBC409.06;uch2	1.085	1.058	1.005	0.966551	0.986493
	SPAC1142.02c	SPAC1142.02c;SPAC17G6.19c	1.016	1.009	1.138	0.875463	0.912382
	SPBC337.12	SPBC337.12		0.845	1.02	0.910412	0.956506
	SPBC405.03c	SPBC405.03c		1.343	1.033	0.785794	0.969749
pob1	SPBC1289.04c	SPBC1289.04c;pob1	0.948	0.952	0.909	0.624647	0.601319
	SPBC428.06c	SPBC428.06c		0.893		1.30184	1.08571
chr1;cfh4	SPBC3E7.12c	SPBC3E7.12c;chr1;cfh4	0.858	0.687	0.613	0.941028	0.937198
	SPAC644.13c	SPAC644.13c	1.024	0.81	0.95	1.24157	1.13725
	SPBC1734.03	SPBC1734.03;SPBC337.19	0.962	0.962	1.024	1.07806	1.10944
	SPAC1782.06c	SPAC1782.06c	0.918	1.164	0.973	0.985045	0.993211
	SPCC777.12c	SPCC777.12c	0.92	0.889	1.039	1.01598	1.14898
msh1	SPAC13F5.01c	SPAC13F5.01c;SPAC23C11.18c;msh1	1.12	1.192	1.005	0.957614	1.59177
msh2;swi8;mut3	SPBC19G7.01c	SPBC19G7.01c;SPBC24C6.12c;msh2;swi8;mut3	1.041	0.904	1.14	0.939743	1.15455
	SPCC1393.02c	SPCC1393.02c	0.908	1.006	0.901	0.856369	0.919454
	SPAC9G1.05	SPAC9G1.05	1.002	1.012	1.176	0.864691	0.826313
msh6	SPCC285.16c	SPCC285.16c;msh6	1.279	1.358	1.291	1.21674	1.33297
	SPAC9G1.07	SPAC9G1.07	1.088	0.759	1	0.860507	0.803837
qcr2	SPCC613.10	SPCC613.10;qcr2	0.949	0.79	0.989	0.757237	0.673152
	SPAC664.08c	SPAC664.08c	1.025	0.654	1.09	0.750397	1.01102
ubc9;hus5	SPAC30D11.13	SPAC30D11.13;ubc9;hus5	0.906	0.758	1.026	1.2896	0.915892
swd3	SPBC354.03	SPBC354.03;swd3	1.158	0.917	1.024	0.923743	0.934187
	SPAC18G6.05c	SPAC18G6.05c	0.936	1.063	1.111	0.872615	0.984329
	SPBC354.04	SPBC354.04	1.048	0.815	1.068	1.19585	1.17283
trs31	SPBC1718.05	SPBC1718.05;trs31		0.692		0.793998	0.977653
	SPBC1734.04	SPBC1734.04;SPBC337.20	1.022	1.084	1.006	0.809361	0.618073
mrps16	SPBC354.06	SPBC354.06;mrps16	1.005	0.943	0.968	1.19071	0.686622
cdc21;mcm4	SPCC16A11.17	SPCC16A11.17;SPCC24B10.01;cdc21;mcm4	0.931	1.06	1.053	0.947411	0.918615
ilv1	SPBP35G2.07	SPBP35G2.07;ilv1	0.854	1.142	0.909	1.02385	0.921563
	SPBC3E7.13c	SPBC3E7.13c			0.83	0.517215	0.790969
ilv3	SPAC17G8.06c	SPAC17G8.06c;ilv3	1.017	1.261	1.11	0.928704	1.13465
B8647-6;meu27	SPCC1259.14c	SPCC1259.14c;B8647-6;meu27				0.0769033	0.027214
cpd1	SPAC9G1.12	SPAC9G1.12;cpd1	1.132	0.796	1.172	0.951025	1.18653
lag1	SPAC1A6.09c	SPAC1A6.09c;lag1	0.999	1.04	1.17	0.896879	0.875593
	SPAC12G12.01c	SPAC12G12.01c;SPAC630.02	1.023	0.962	1.095	1.01117	1.01726
gyp7	SPAC630.05	SPAC630.05;gyp7	1.021		1.101	0.649613	0.399981
	SPBC354.10	SPBC354.10	1.007	0.989	0.955	0.858088	0.909996
rga6	SPBC354.13	SPBC354.13;rga6	1.053	0.853	1.235	0.882232	0.756352
	SPAC23A1.02c	SPAC23A1.02c	1.061	0.748	0.906	0.247808	0.605536
	SPAC23C4.05c	SPAC23C4.05c	0.972	0.861	0.682	1.22426	1.03054
rfc3	SPAC27E2.10c	SPAC27E2.10c;SPAPJ698.01c;rfc3	1.006	0.989	0.913	1.19482	1.12735
alg13	SPAC56E4.02c	SPAC56E4.02c;alg13			0.976	1.10431	1.03606
rfc4	SPAC1687.03c	SPAC1687.03c;rfc4	1.104	0.822	1.015	1.0699	1.06302
	SPBC21C3.09c	SPBC21C3.09c	1.026	0.85	1.017	0.910163	0.93067
rfc5	SPBC83.14c	SPBC83.14c;rfc5	0.787	0.861	0.905	1.37069	0.871731
	SPAC1565.02c	SPAC1565.02c	1.043	1.03	1.156	1.0461	1.04834
tfg2	SPBC1198.13c	SPBC1198.13c;SPBC660.03c;tfg2	1.02	1.148	1.006	0.84682	1.02676
	SPBC56F2.07c	SPBC56F2.07c	0.994	0.981	0.886	1.08045	1.08564
	SPAC3H1.06c	SPAC3H1.06c	0.823	0.938	0.655	0.838733	0.459236
pdf1	SPBC530.12c	SPBC530.12c;pdf1	0.749	0.694	0.825	0.815274	0.9993
	SPBC1683.03c	SPBC1683.03c	0.825	1.308	0.823	1.15477	1.38254
	SPCC1884.01	SPCC1884.01	0.977	1.118		1.02919	1.15314
	SPAP27G11.02	SPAP27G11.02	1.067	1.046	1.191	0.95459	0.809891
	SPBC365.10	SPBC365.10	1.049	0.986	0.972	0.912129	1.06567
	SPAP27G11.03	SPAP27G11.03	1.034	1.065	1.056	0.979227	1.03018
	SPBC365.11	SPBC365.11	1.032		1.219	0.91507	1.34431
	SPAC1751.04	SPAC1751.04	0.969	1.103	1.259	0.920293	0.945742
	SPAC3G6.10c	SPAC3G6.10c	1.338	0.994	0.969	0.497669	1.211
ugo1	SPAC1B2.02c	SPAC1B2.02c;ugo1	0.916	0.865	1.099	0.881137	0.91196
	SPAC17A2.05	SPAC17A2.05	0.943	0.88	0.806	1.01871	0.999713
	SPBC16E9.01c	SPBC16E9.01c;SPBP16F5.09c	1.085			1.29113	0.988331
	SPBC365.16	SPBC365.16	0.943	0.819	0.838	1.11507	0.749096
	SPAPB8E5.07c	SPAPB8E5.07c	0.98	1.057	1.082	0.741898	0.911184
fkh1;fkbp12	SPBC839.17c	SPBC24E9.17c;SPBC839.17c;fkh1;fkbp12	1.031	0.799	0.936	1.04574	0.934839
	SPBC23E6.10c	SPBC23E6.10c	0.891	0.91	1.015	1.30579	1.3796
	SPSNRNA.02	SPSNRNA.02
	SPAC11G7.01	SPAC11G7.01	0.87	0.914	0.761	0.626989	0.589766
idh1;glu3	SPAC11G7.03	SPAC11G7.03;idh1;glu3	1.032	1.143	0.954	1.10268	1.0315
pub1;elp2	SPAC11G7.02	SPAC11G7.02;pub1;elp2	0.889	1.103	0.951	1.00952	0.780644
orp1;cdc30;orc1	SPBC29A10.15	SPBC29A10.15;orp1;cdc30;orc1				1.03344	1.05937
	SPBC56F2.08c	SPBC56F2.08c	0.877	1.15	0.999	0.920277	0.713382
	SPBC1703.08c	SPBC1703.08c	0.948	1.071	0.946	1.72083	1.93491
	SPAC17A2.11	SPAC17A2.11				1	1
	SPAP27G11.12	SPAP27G11.12	1.042	1.082	0.879	0.917293	0.930723
	SPAC17A2.12	SPAC17A2.12	1.103	1.136	0.822	0.728559	0.69143
	SPCC576.19c	SPCC576.19c		1.4	0.895	1.3989	1.12786
	SPAC24H6.01c	SPAC23E2.04c;SPAC24H6.01c;SPAPB21F2.01	1.074	1.266	1.152	1.12326	1.34707
	SPBC6B1.03c	SPBC6B1.03c				1.0013	1.24269
tif212;tif22;tif212B2.16	SPAC32A11.04c	SPAC32A11.04c;SPAC6B12.17c;tif212;tif22;tif212B2.16	1.054	0.844	0.941	0.919342	0.957225
	SPAC17A2.14	SPAC17A2.14;SPAC17G6.01	0.988	0.901	0.961	0.986782	0.919815
	SPAC17A2.15	SPAC17A2.15				1	1
	SPAC1B2.03c	SPAC1B2.03c	0.849	1.193	0.962	1.06318	0.816353
slx1	SPAP27G11.15	SPAP27G11.15;slx1	1.113	1.06	0.918	1.11905	1.34722
	SPAP27G11.16	SPAP27G11.16	1.01	0.912	0.927	0.329899	0.579132
	SPBC16E9.02c	SPBC16E9.02c	1.139	1.044	1.049	0.598835	0.661076
taf9	SPAC12G12.05c	SPAC12G12.05c;taf9			0.992	1.12393	1.12386
puc1	SPBC19F5.01c	SPBC19F5.01c;SPBP8B7.32c;puc1			0.904	0.871243	0.844459
	SPAC2F3.07c	SPAC2F3.07c				1	1
for3	SPCC895.05	SPCC895.05;for3	0.947	1.021	0.862	0.911134	0.949324
	SPCC306.02c	SPCC306.02c	0.862	0.991	1.045	0.671039	0.508941
arg5	SPBC56F2.09c	SPBC56F2.09c;arg5	0.942	1.092	0.76	1.17647	1.0204
	SPAC3H1.08c	SPAC3H1.08c			1.154	1.28357	1.14582
	SPACUNK4.11c	SPAC2E11.11C;SPACUNK4.11c				0.940855	0.943806
csx1	SPAC17A2.09c	SPAC17A2.09c;csx1	1.092	0.938	1.232	0.951592	0.450618
csx2	SPBC17G9.08c	SPBC17G9.08c;csx2	0.795	0.791	0.889	0.988467	1.06981
	SPAC24H6.02c	SPAC24H6.02c	1.095	0.661	1.268	1.42502	1.25777
mcm3	SPCC1682.02c	SPCC1682.02c;mcm3	0.926	1.227	1.08	0.817481	0.903846
	SPCC663.13c	SPCC663.13c	1.04	1.199	0.954	1.12636	1.16103
mcm7;cdc47	SPBC25D12.03c	SPBC25D12.03c;mcm7;cdc47	1.165	1.159	1.209	1.25527	1.37453
	SPBC557.02c	SPBC557.02c	1.188		1.123	0.881794	0.918848
	SPBC16E9.03c	SPBC16E9.03c			1.001	1.3363	1.27759
	SPAC13G6.10c	SPAC13G6.10c	0.925	1.101	0.824	0.859891	0.798372
mpd2	SPAC4F10.13c	SPAC4F10.13c;mpd2	0.926	0.995	1.042	0.926351	0.968625
	SPAC12G12.06c	SPAC12G12.06c	0.936	0.87	1.217	1.0109	1.0348
	SPAC15A10.05c	SPAC15A10.05c			1.081	0.904641	0.803582
dak1	SPAC22A12.11	SPAC22A12.11;dak1	0.882	0.91	0.92	0.651027	0.836987
dak2;dak1	SPAC977.16c	SPAC977.16c;dak2;dak1				0.977201	0.817739
	SPAC3H1.09c	SPAC3H1.09c	0.95	0.892	1.046	1.13539	0.994621
irp1	SPACUNK4.12c	SPACUNK4.12c;irp1	1.011	1.026	1.003	1.05636	1.31221
	SPCC24B10.08c	SPCC24B10.08c			0.801	1.1579	1.11022
ppk6	SPAC1805.01c	SPAC1805.01c;SPAPJ736.02c;ppk6	0.987	0.884	0.961	1.00283	1.09776
	SPBC1306.01c	SPBC1306.01c;SPBC409.22c	1.528	1.747	1.936	0.914065	0.932119
	SPBC530.15c	SPBC530.15c;SPBC661.01	0.71	0.663	0.878	0.801765	0.480851
	SPBC1683.06c	SPBC1683.06c				2.14507	2.11087
mis17	SPBC21.01	SPBC21.01;SPBC776.19;mis17			1.11	1.23292	1.14578
res1;goa2;sct1	SPBC725.16	SPBC725.16;res1;goa2;sct1	1.109	0.891	1.221	0.690873	0.773142
	SPBC21.02	SPBC21.02			0.86	0.92593	1.18236
	SPBC6B1.05c	SPBC6B1.05c			1.112	1.07174	1.04868
med8;sep15	SPBC21.04	SPBC21.04;med8;sep15			0.925	0.88757	1.28127
	SPCC663.14c	SPCC663.14c			1.093	1	1
uba2;fub2	SPBC16H5.03c	SPBC16H5.03c;uba2;fub2		0.96	0.986	1.06229	1.12963
	SPBC16C6.01c	SPBC16C6.01c;SPBC543.11c				1.42179	1.50062
uba3	SPAC24H6.12c	SPAC24H6.12c;uba3			0.918	1.11534	1.03532
uba5	SPAC323.06c	SPAC323.06c;uba5	1.087	1.009	0.956	1.10872	1.32076
ste13	SPBC776.09	SPBC776.09;ste13	0.954	0.856	0.939	0.998077	0.797693
	SPAC23H3.15c	SPAC23H3.15c;SPAC25H1.01c			0.91	0.381981	0.349452
erg12	SPAC13G6.11c	SPAC13G6.11c;erg12	0.997	1.051	1.025	1.11681	1.21433
ste20;ste16	SPBC12C2.02c	SPBC12C2.02c;ste20;ste16				0.956184	0.88649
	SPAC12G12.07c	SPAC12G12.07c	1.084	0.968	0.971	1.01757	1.18676
ggt2;ggt	SPAC56E4.06c	SPAC56E4.06c;ggt2;ggt	1.06	0.873	0.863	0.834202	0.556819
mra1	SPAC18G6.07c	SPAC18G6.07c;mra1	0.965	1.053	1.119	1.00022	1.00022
set1	SPCC306.04c	SPCC306.04c;set1	1.032	0.863	0.9	0.718911	0.841177
	SPACUNK4.13c	SPACUNK4.13c			1.16	0.973677	0.978633
cta4;sev4	SPACUNK4.07c	SPAC2E11.07C;SPACUNK4.07c;SPAPYUK71.01;cta4;sev4	0.944	1.321	0.955	0.890922	1.00093
	SPNCRNA.103	SPNCRNA.103
	SPAC1805.02c	SPAC1805.02c	0.977	0.912	0.986	1.09465	1.10442
	SPCC285.03	SPCC285.03	1.059	1.574		0.725128	0.742716
	SPAC3G9.01	SPAC3G9.01	1.021	1.188	1.072	1.19893	1.47476
	SPCC285.04	SPCC285.04	1.149	0.762	1.203	1.24444	1.06175
fap1	SPBC354.15	SPBC354.15;fap1			1.051	1.02374	1.17912
cyk3	SPAC9G1.06c	SPAC9G1.06c;cyk3		0.87	0.921	1.10185	1.01781
mfs1	SPBC16A3.17c	SPBC16A3.17c;mfs1	0.966	1.013	0.978	1.0558	1.17589
anc1	SPBC530.10c	SPBC530.10c;anc1	0.839	0.862	0.896	0.916901	0.939075
	SPAC1782.08c	SPAC1782.08c	0.963	0.884	1.118	1.12105	1.22446
erg24	SPBC16G5.18	SPBC16G5.18;erg24	1.007	1.126	1.131	1.05409	1.05478
	SPAC3A12.13c	SPAC3A12.13c	0.922	1.127	1.062	1.10109	0.993478
	SPAC630.10	SPAC630.10				1.1609	1.17058
uvi15	SPBC649.04	SPBC649.04;uvi15	1.02	1.051	0.727	0.902177	0.550172
	SPAC630.11	SPAC630.11	0.893	0.886	0.993	0.975507	0.930917
	SPAC630.12	SPAC630.12				1.01203	1.09499
fas2;lsd1;lsd	SPAC4A8.11c	SPAC4A8.11c;fas2;lsd1;lsd	0.984	1.29	0.985	0.920192	1.00639
	SPAC630.15	SPAC630.15				1.15244	1.35494
	SPAC19B12.01	SPAC19B12.01;SPAC4F10.21	0.958	0.953	1.47	0.702189	0.956867
	SPCC23B6.01c	SPCC23B6.01c	0.921	0.947	0.645	1.01106	1.04167
	SPAC19B12.08	SPAC19B12.08			1.217	0.561631	0.294353
	SPAC23C4.06c	SPAC23C4.06c			1.049	1.09149	1.04197
		NULL_SPBC428.09c
flp1;clp1	SPAC1782.09c	SPAC1782.09c;flp1;clp1	1.002	1.255	0.981	0.532255	1.006
uvi22;rrg1	SPCC338.11c	SPCC338.11c;uvi22;rrg1	0.987	1.069	1.087	0.786095	0.969197
sst2	SPAC19B12.10	SPAC19B12.10;sst2			1.189	0.878298	0.837449
	SPCC23B6.02c	SPCC23B6.02c	1.155	0.784	0.944	0.676696	0.617064
	SPBC31E1.05	SPBC31E1.05	1.129		1.076	0.873906	0.978331
mnl1	SPAC23A1.04c	SPAC23A1.04c;mnl1	1.227	1.068	0.975	1.05211	1.13356
	SPAC9G1.08c	SPAC9G1.08c	1.016	1.026	0.896	1.22295	1.32406
pof1	SPAC57A10.05c	SPAC57A10.05c;pof1	1.053	1.332		0.867685	0.637563
	SPCC1919.03c	SPCC1919.03c	0.999	0.848	0.861	0.899155	0.880821
rsm19	SPAC1751.02c	SPAC1751.02c;rsm19	0.993	0.851	1.112	0.969824	0.725859
pof3	SPCC338.16	SPCC338.16;pof3		1.069		1.04313	1.06844
mrpl9	SPAC644.17c	SPAC644.17c;mrpl9	1.044	0.774	0.935	1.0062	0.972213
dic1	SPBC646.17c	SPBC646.17c;SPBC855.01c;SPBP35G2.01c;dic1			0.961	0.595836	0.336284
uvi31	SPBC16E9.06c	SPBC16E9.06c;uvi31	1.169	1.128	1.028	0.952427	0.941851
	SPBC3D6.03c	SPBC3D6.03c	0.939	1.176	0.942	0.834551	1.09412
	SPAC17A2.02c	SPAC17A2.02c	0.883	1.311	1.04	0.89016	1.15107
	SPCC1393.06c	SPCC1393.06c		1.02	0.977	0.900987	0.988713
uvde;uve1	SPBC19C7.09c	SPBC19C7.09c;uvde;uve1			0.975	1.05882	1.47101
rps8;rps8-1;rps801	SPAC2C4.16c	SPAC2C4.16c;rps8;rps8-1;rps801	0.865	0.952	0.947	0.957199	0.987075
rps8-2;rps802	SPAC521.05	SPAC521.05;rps8-2;rps802	0.876	1.03	0.955	0.936602	0.971558
	SPAC18G6.09c	SPAC18G6.09c	0.887	1.05	0.785	0.491134	0.280068
	SPAC13G7.09c	SPAC13G7.09c			1.104	1.00691	1.02382
	SPBCPT2R1.04c	SPBCPT2R1.04c
stl1;spo14	SPBC3H7.01	SPBC3H7.01;SPBP16F5.01c;stl1;spo14	0.871	0.929	0.915	1.1165	1.26417
TPK;pka1;tpk;git6	SPBC106.10	SPBC106.10;TPK;pka1;tpk;git6		0.912	0.754	0.885314	0.575768
rgs1;YA8c	SPAC22F3.12c	SPAC22F3.12c;rgs1;YA8c	0.821	0.466	0.661	0.711818	0.648251
	SPCC777.17c	SPCC777.17c	1.119	1.251	1.305	0.987349	1.11367
tim17	SPAC3A12.16c	SPAC3A12.16c;tim17	0.905	0.975	1.035	1.03011	0.834542
	SPBC887.13c	SPBC887.13c	1.042		1.113	0.886773	0.986844
mad1	SPBC3D6.04c	SPBC3D6.04c;mad1	1.175	1.124	0.98	0.999768	0.989642
vma6	SPAC17A2.03c	SPAC17A2.03c;vma6	0.979	1.147	0.995	1.03978	1.01527
	SPCC1393.07c	SPCC1393.07c				1.1813	1.15967
	SPAC1039.05c	SPAC1039.05c	1.176	0.879	0.919	0.963553	1.07651
	SPCC23B6.04c	SPCC23B6.04c	0.989	0.823	0.858	0.857114	0.898476
skb1;rmt5	SPBC16H5.11c	SPBC16H5.11c;skb1;rmt5	1.004	0.965	1.031	0.94457	0.973958
skb5	SPCC24B10.13	SPCC24B10.13;skb5	1.004	1.129	1.138	0.802808	0.693542
	SPAC23C4.09c	SPAC23C4.09c	0.937	0.641	1.097	1.12336	1.04831
	SPBCPT2R1.05c	SPBCPT2R1.05c				1	1
tnr3;TPK	SPAC6F12.05c	SPAC6F12.05c;tnr3;TPK	1.009	0.975	1.04	1.06818	1.1026
	SPAC20G8.04c	SPAC20G8.04c	1.083	1.395	0.977	1.06145	1.30351
sgo1	SPBP35G2.03c	SPBP35G2.03c;sgo1			0.853	0.699053	1.00637
	SPBC21C3.03	SPBC21C3.03	1.116	1.013	1.164	1.14083	1.42276
	SPCC126.01c	SPCC126.01c;SPCC576.18c	0.913		0.878	0.862061	1.10755
	SPBC21C3.06	SPBC21C3.06	0.944	0.938	1.13	0.918583	0.911857
	SPAC683.03	SPAC683.03				1	1
nse1	SPCC550.05	SPCC550.05;nse1			1.361	1.03805	1.14316
cys12;cys1b	SPAC3A12.17c	SPAC3A12.17c;cys12;cys1b	1.078		0.917	1.2456	1.11978
	SPAC17A2.04c	SPAC17A2.04c		0.953	0.973	0.905768	0.943769
	SPCC550.07	SPCC550.07			0.989	1.30507	1.03355
ura1	SPAC22G7.06c	SPAC22G7.06c;ura1	0.857	0.777	0.979	0.940526	1.09476
	SPCC550.08	SPCC550.08	1.073		0.987	1.07996	1.05702
	SPCC550.09	SPCC550.09	1.092	0.897	0.946	1.08537	1.19852
ura3	SPAC57A10.12c	SPAC57A10.12c;ura3	0.92	1.055	1.338	0.946929	1.06386
ura4	SPCC330.05c	SPCC330.05c;ura4	1.182	1.021	1.176	0.945425	0.999992
	SPAP27G11.04c	SPAP27G11.04c	1.097	1.253	1.099	1.23963	1.56394
klp1	SPBC15D4.01c	SPBC15D4.01c;SPBC2D10.21c;klp1	1.344		0.875	1.10888	1.03582
	SPAC4G9.04c	SPAC4G9.04c	1.006	1.069	0.958	0.811594	0.823013
Nup133b;nup132	SPAC1805.04	SPAC1805.04;Nup133b;nup132	0.92	0.924	0.932	0.868939	0.999179
	SPBC244.02c	SPBC244.02c	0.994	0.853	1.159	0.777158	0.985264
taf11	SPAC13D6.03c	SPAC13D6.03c;taf11	1.028	0.857	1.023	1.11416	1.04094
klp5;sot1	SPBC2F12.13	SPBC2F12.13;klp5;sot1	0.854	1.009	0.843	1.0709	1.37253
sot2;klp6	SPBC1685.15c	SPBC1685.15c;SPBC649.01c;sot2;klp6			0.924	1.24665	1.01394
cuf1	SPAC31A2.11c	SPAC31A2.11c;cuf1		1.097	0.852	0.972986	0.969261
klp8	SPAC144.14	SPAC144.14;klp8	1.508	1.573	1.57	1.46877	1.53255
gtp1;gtp1B49.05	SPBC354.01	SPBC354.01;SPBC649.06;gtp1;gtp1B49.05	1.035	1.086	1.169	0.962712	1.08042
dos1;cmc1;raf1;clr8	SPCC613.12c	SPCC613.12c;dos1;cmc1;raf1;clr8			0.972	0.773033	0.857852
	SPBCPT2R1.06c	SPBCPT2R1.06c				1	1
ncs1	SPAC18B11.04	SPAC18B11.04;ncs1	1.014	0.916	1.181	0.669641	0.426827
gpi18	SPAC18B11.05	SPAC18B11.05;gpi18	1.039	0.871		0.95059	1.06499
	SPAC18B11.06	SPAC18B11.06	0.954	1.005	1.341	0.877131	1.02811
	SPBC21C3.11	SPBC21C3.11	1.119	0.922	1.193	0.948758	1.06153
	SPAC16A10.01	SPAC16A10.01			1.134	0.325353	0.26686
	SPAC16A10.02	SPAC16A10.02	0.968	0.938	0.871	0.951722	1.08171
	SPBP35G2.04c	SPBP35G2.04c	1.032		0.945	1.01797	0.927984
aur1	SPAC3H8.06	SPAC3H8.06;aur1	0.955	1.072	1.102	0.842144	0.720481
	SPCC550.11	SPCC550.11	0.995	1.034	0.925	0.919901	0.855557
rho4	SPAC16A10.04	SPAC16A10.04;rho4	1.053	1.054	0.848	1.49	1.02561
mrp4	SPAC24C9.10c	SPAC24C9.10c;mrp4	0.978		0.948	1.10467	0.82716
arp6	SPCC550.12	SPCC550.12;arp6	1.024	1.026		1.01008	1.01008
	SPAC3G9.02	SPAC3G9.02	1.108	0.845	1.161	1.20828	1.14491
	SPCC285.05	SPCC285.05	0.876	1.177	0.88	0.8414	0.775135
ssu72	SPAC3G9.04	SPAC3G9.04;ssu72				1.19898	1.16445
ucp2;ubp33;ubp14	SPBC6B1.06c	SPBC6B1.06c;ucp2;ubp33;ubp14	0.995	0.88	0.948	0.757687	0.644413
	SPAC3G9.05	SPAC3G9.05	0.804	0.766	0.995	0.943376	0.963306
	SPAC3G9.06	SPAC3G9.06	1.037	1.288	1.104	0.98439	1.10941
	SPCC663.15c	SPCC663.15c	1.003	1.034	0.984	0.914861	0.968899
png1	SPAC3G9.08	SPAC3G9.08;png1	1.079	1.325	0.982	0.966493	0.814178
eco1;eso1	SPBC16A3.11	SPBC16A3.11;eco1;eso1		1.104	1.396	1.30507	1.43431
kap111	SPAC22G7.02	SPAC22G7.02;kap111	0.875	0.725	0.908	0.952494	1.11552
	SPAC22G7.03	SPAC22G7.03				1.34631	1.14994
	SPAC1565.07c	SPAC1565.07c	0.96	1.02	0.937	1.08899	1.15425
ubp13;pan2	SPAC22G7.04	SPAC22G7.04;ubp13;pan2	0.964	0.972	0.971	1.23951	1.16687
	SPAC22G7.05	SPAC22G7.05	0.993	0.965	1.103	0.717271	0.961284
	SPAC694.02	SPAC694.02	1.019	1.185	1.063	0.835804	1.03195
ins1	SPCC306.05c	SPCC306.05c;ins1	1.096	1.099	0.929	0.987752	0.76288
fzo1	SPBC1706.03	SPBC1706.03;SPBC24E9.01;SPBC839.01;fzo1			0.866	0.856853	0.974098
	SPAC694.03	SPAC694.03			1.096	1.23721	1.2666
	SPBC839.02	SPBC24E9.02;SPBC839.02	1.147	0.874	0.828	1.07883	0.759733
ppk8	SPAC22G7.08	SPAC22G7.08;ppk8	0.911		1.002	0.975584	0.76143
	SPAC4H3.02c	SPAC4H3.02c	0.983		1.032	1.18407	1.11415
ibp1	SPBC839.07	SPBC24E9.07;SPBC839.07;ibp1			1.262	1.16159	1.34724
ucp10	SPCC285.11	SPCC285.11;ucp10	1.014	0.865	0.854	0.923018	0.863834
	SPAC1805.03c	SPAC1805.03c			1.082	1.45305	1.44844
aes1	SPBPB21E7.07	SPAPB21E7.07;SPBPB21E7.07;aes1	1.408	1.065	1.017	4.94247	5.02185
	SPCC285.14	SPCC285.14	0.11		0.908	0.989762	1.27895
	SPAC3G9.12	SPAC3G9.12	0.9	0.861	0.984	0.91939	1.14022
rps14-1;rps1401;rps14	SPAC3H5.05c	SPAC3H5.05c;rps14-1;rps1401;rps14	0.926	0.994	0.915	1.43829	1.53004
rps1402;rps14;rps14-2	SPBC18H10.13	SPBC18H10.13;rps1402;rps14;rps14-2	0.903	1.077	0.977	1.02172	1.00918
spp27;uaf30	SPCC285.17	SPCC285.17;spp27;uaf30	1.142	1.067	0.954	1.01375	0.897616
ubc1	SPBC2D10.20	SPBC2D10.20;ubc1	0.754			1.26883	1.16556
	SPCC1902.02	SPCC1902.02;SPCC663.16c	0.953	1.023	1.152	0.204973	0.769262
pof13	SPBC1271.01c	SPBC1271.01c;pof13				0.986245	0.766368
	SPBC16C6.03c	SPBC16C6.03c	1.19		1.249	0.756146	0.830894
ubc4	SPBC119.02	SPBC119.02;ubc4	1.013	0.987	1.052	0.987563	1.05495
ubc6	SPAC10F6.05c	SPAC10F6.05c;ubc6	0.943		0.901	1.15822	0.83139
ubc8	SPBC211.07c	SPBC211.07c;ubc8	1.096	0.771	0.871	1.20729	1.08587
	SPCC970.02	SPCC970.02	0.959	0.844	1.158	0.894924	0.968673
	SPAC4F10.16c	SPAC4F10.16c	1.28	1.107	1.143	0.823295	0.887088
	SPCC970.03	SPCC970.03	0.971	1.144	1.246	1.07269	1.15126
	SPCC970.06	SPCC970.06	0.971		0.856	0.850878	0.769701
	SPAC3H8.05c	SPAC3H8.05c	1.013	1.078	0.904	0.977859	1.24868
	SPAC22G7.10	SPAC22G7.10	0.996	0.91	1.093	1.24299	1.2244
	SPCC970.08	SPCC970.08	0.999	0.861	0.934	0.730239	0.532952
	SPBC1773.10c	SPBC1773.10c	0.91	1.176	0.949	0.926219	1.02501
sec8;mut2	SPCC970.09	SPCC970.09;sec8;mut2	0.996	0.921	0.846	1.086	1.20158
	SPBC839.10	SPBC24E9.10;SPBC839.10	1.012	0.788	1.105	0.84967	1.04295
	SPCC306.06c	SPCC306.06c	0.944	0.882	0.887	1.00115	1.29171
rpc31	SPBC839.12	SPBC24E9.12;SPBC839.12;rpc31			1.138	1.03482	1.1842
	SPAC2F3.01	SPAC2F3.01;SPAC323.09	1.07	0.873	1.14	0.391363	0.215964
clr3;hoc2	SPBC800.03	SPBC800.03;SPBSPU41410.03;clr3;hoc2	1.012	1.062	1.056	1.0952	0.937249
	SPAC2F3.02	SPAC2F3.02	1.065	0.721	1.037	0.944147	0.842682
clr4	SPBC428.08c	SPBC428.08c;clr4			0.85	0.787533	1.06797
	SPAC4H3.03c	SPAC4H3.03c			0.609	0.908847	0.662485
clr6	SPBC36.05c	SPBC36.05c;clr6	1.005	0.995	1.003	1.08939	1.2097
	SPBC839.16	SPBC24E9.16;SPBC839.16	0.753	0.835	0.653	0.997932	1.07096
rpb6;rpo15	SPCC1020.04c	SPCC1020.04c;rpb6;rpo15	0.926	0.952	1.026	1.04789	0.940507
sut1	SPAC2F3.08	SPAC2F3.08;sut1				0.751539	0.728369
	SPAC22A12.12c	SPAC22A12.12c	0.9	0.916	1.117	1.19155	0.94391
hem1	SPAC2F3.09	SPAC2F3.09;hem1	0.904	1.093	0.831	1.10191	1.09962
	SPBC6B1.08c	SPBC6B1.08c	0.995	0.862	1.109	1.19714	0.83133
rps10B;rps10;rps1002;rps10-2;c973;pi023	SPBP22H7.08	SPACTOKYO_453.11;SPBP22H7.08;rps10B;rps10;rps1002;rps10-2;c973;pi023	0.978	1.057	0.996	0.972261	0.988506
arg11	SPAC4G9.09c	SPAC4G9.09c;arg11	0.951	1.17	0.975	0.900276	0.823847
tom7	SPBC27B12.10c	SPBC27B12.10c;tom7	0.914	1.188	1.106	1.0504	0.974857
mis18	SPCC970.12	SPCC970.12;mis18	0.988	0.949	0.946	0.634113	0.893383
ryh1BC5.03;rad31;uba4	SPAC4C5.04	SPAC4C5.04;ryh1BC5.03;rad31;uba4				1.3336	1.36122
	SPAC15A10.09c	SPAC15A10.09c	1.175		0.961	0.460891	0.286503
mvd1	SPAC24C9.03	SPAC24C9.03;mvd1	1.08	0.636	1.085	1.01509	1.00019
	SPAC24C9.04	SPAC24C9.04	1.182	1.008	0.782	0.805145	0.74151
	SPBC1773.11c	SPBC1773.11c	1.059	0.807	0.927	1.11113	0.799021
	SPNCRNA.92	SPNCRNA.92	0.939	1.17	0.821
	SPAC24C9.08	SPAC24C9.08	0.93	0.599	0.783	0.891456	1.00213
	SPAC24C9.09	SPAC24C9.09				0.686796	0.85297
	SPCC306.07c	SPCC306.07c	0.995	0.789	1.044	0.744141	0.820491
	SPAC2F3.10	SPAC2F3.10	1.123	1.011	1.137	1.17585	0.998416
	SPAC2F3.11	SPAC2F3.11	0.777	0.667	1.023	0.880696	0.917795
	SPAC4H3.04c	SPAC4H3.04c			1.061	1.19193	1.03489
	SPACUNK4.16c	SPACUNK4.16c		0.876		1.78454	1.70966
lsk1	SPAC2F3.15	SPAC2F3.15;lsk1	1.167	0.896	1.087	1.1216	1.03071
	SPAC2F3.16	SPAC2F3.16	0.954	1.433	0.974	0.865514	0.894881
SPAC2F3.17c	SPAC2F3.18c	SPAC2F3.18c;SPAC2F3.17c	1.016	1	1.095	0.882851	0.785264
ccq1	SPCC188.07	SPCC188.07;ccq1			0.884	1.06589	1.29674
nbs1	SPBC6B1.09c	SPBC6B1.09c;nbs1			0.973	0.843774	0.88888
	SPBC16A3.02c	SPBC16A3.02c	0.851	1.065	0.606	0.864794	0.958856
	SPBC1271.03c	SPBC1271.03c	1.124	0.96	0.982	0.585224	0.326455
cdc28;cdc28BB10.02;prp8;rps4;cdc28B21.07c	SPBC19C2.01	SPBC19C2.01;SPBC21B10.01c;SPBC874.01;cdc28;cdc28BB10.02;prp8;rps4;cdc28B21.07c	1.118	0.92	1.166	0.549982	0.499834
	SPBP19A11.02c	SPBP19A11.02c	1.204	0.756	0.87	0.916096	1.01948
pi067	SPBC27B12.11c	SPBC27B12.11c;pi067	0.868	0.965	0.912	0.897886	0.802073
	SPAC24C9.11	SPAC24C9.11	1.115	1.107	1.069	0.674071	0.759091
	SPBC1289.10c	SPBC1289.10c	1.078	0.942	1.047	1.0601	0.896161
	SPAC3H8.07c	SPAC3H8.07c	1.037	0.99	1.225	0.869063	0.866993
	SPBC12C2.03c	SPBC12C2.03c	0.678	0.908	0.644	1.00349	0.469244
	SPAC24C9.14	SPAC24C9.14	1.007	1.099	0.99	1.17595	1.14116
	SPBC609.01	SPAC609.01;SPBC609.01	0.981	1.155	0.82	1.91827	1.19738
	SPCC306.08c	SPCC306.08c	0.957	0.955	0.766	0.863643	0.848631
ptn1	SPBC609.02	SPAC609.02;SPBC609.02;ptn1			1.151	1.36419	1.47187
	SPBC609.03	SPAC609.03;SPBC609.03			0.906	0.622113	0.562408
caf5	SPBC609.04	SPAC609.04;SPBC609.04;caf5	0.898	1.56	0.933	1.1781	1.26476
	SPBC609.05	SPAC609.05;SPBC609.05			1.014	1.07407	1.07771
	SPBC29A10.10c	SPBC29A10.10c	1.058	0.936	0.968	1.10072	1.3042
	SPCC550.14	SPCC550.14	1.075	1.15	0.909	1.00311	1.09264
	SPBC3D6.06c	SPBC3D6.06c	0.916	1.112	1.019	1.04428	0.938571
	SPBC21C3.19	SPBC21C3.19			0.432	0.872932	0.965288
	SPCC1393.09c	SPCC1393.09c	1.093	0.869	1.271	0.914662	1.10856
	SPBC887.15c	SPBC887.15c	1.051	0.887	1.081	0.901815	0.627846
ish1	SPBC365.12c	SPBC365.12c;ish1			0.801	0.794606	0.81627
	SPAC1039.07c	SPAC1039.07c			1	0.516166	0.34361
	SPAC3A11.13	SPAC3A11.13;SPAC3H5.02	1.062	0.821	1.036	0.983338	1.18594
	SPAC1805.10	SPAC1805.10			1.063	1.2055	1.49112
	SPCC569.03	SPCC569.03	0.841		0.635	0.375324	0.598606
aar2	SPAC3H5.04	SPAC3H5.04;aar2	1.035	1.167	1.008	0.91127	0.809564
	SPCC569.04	SPCC569.04				1.0546	1.05788
sdc1	SPCC18.11c	SPCC18.11c;sdc1	1.008	0.851	1.143	1.00997	0.993115
	SPCC569.06	SPCC569.06				0.993528	0.881201
	SPAC1805.14	SPAC1805.14	1.13	0.991	1.102	0.963631	1.36813
	SPCC569.07	SPCC569.07	0.986			1.64268	1.42135
	SPAC1610.02c	SPAC1610.02c	0.935	0.833	1.085	1.17468	1.26142
btb3	SPAC13D6.04c	SPAC13D6.04c;btb3	0.981	0.929	1.058	0.506996	0.571727
	SPNCRNA.70	SPNCRNA.70
	SPNCRNA.71	SPNCRNA.71
	SPNCRNA.72	SPNCRNA.72
	SPNCRNA.73	SPNCRNA.73
	SPNCRNA.74	SPNCRNA.74
	SPNCRNA.76	SPNCRNA.76
	SPBCPT2R1.07c	SPBCPT2R1.07c
	SPNCRNA.77	SPNCRNA.77
tup11	SPAC18B11.10	SPAC18B11.10;tup11	0.965	0.915	0.955	1.20411	0.93848
	SPNCRNA.78	SPNCRNA.78
	SPAC18B11.11	SPAC18B11.11;SPAC1F5.01			0.962	1.09944	1.07148
	SPCC18B5.10c	SPBC18B5.10c;SPCC18B5.10c	0.961	1.071	0.988	0.879827	1.21558
	SPAP32A8.03c	SPAP32A8.03c	0.934	0.936	0.904	1.05796	1.03332
	SPNCRNA.95	SPNCRNA.95
rps3a-1;rps1-1;rps101	SPAC13G6.02c	SPAC13G6.02c;rps3a-1;rps1-1;rps101	0.877	1.162	0.921	0.957759	1.02242
ubc11;ubcdp;ubcp4	SPCC1259.15c	SPCC1259.15c;ubc11;ubcdp;ubcp4	1.011	0.648	0.931	1.19559	1.05671
mgm1;msp1	SPBC1718.06	SPBC1718.06;mgm1;msp1	1.026	1.252	1.071	0.824511	0.835327
vps8	SPAC17A2.06c	SPAC17A2.06c;vps8	1.029	0.849	0.891	0.684726	0.774599
	SPAC3H5.11	SPAC3H5.11			0.961	1.12568	1.03619
aps1	SPAP27G11.06c	SPAP27G11.06c;aps1	0.925	0.881	1.083	0.856714	0.897425
	SPAC4G9.06c	SPAC4G9.06c	0.835	0.95	0.777	0.853582	0.929945
	SPCC18.12c	SPCC18.12c	0.941	1.013	1.051	0.801008	1.11132
	SPNCRNA.80	SPNCRNA.80
	SPNCRNA.81	SPNCRNA.81
	SPNCRNA.82	SPNCRNA.82
gtr1	SPBC337.13c	SPBC337.13c;gtr1	1.143	0.811	0.932	1.03874	1.0648
	SPNCRNA.83	SPNCRNA.83
gtr2	SPCC777.05	SPCC777.05;gtr2	1.012	0.789	0.882	1.13321	1.02675
	SPNCRNA.84	SPNCRNA.84
fbp1	SPBC1198.14c	SPBC1198.14c;SPBC660.04c;fbp1	1.071	1.861	1.311	0.419098	0.161627
	SPAC17A5.15c	SPAC17A5.15c	0.879	1.023	0.99	0.965492	1.09807
	SPBCPT2R1.08c	SPBCPT2R1.08c				2.25128	1.04411
	SPNCRNA.88	SPNCRNA.88
	SPNCRNA.89	SPNCRNA.89
rpb10	SPAC1B3.12c	SPAC1B3.12c;rpb10	0.963	0.954	1.076	0.979489	0.956064
mrpl33	SPCC1919.08c	SPCC1919.08c;mrpl33	1.143	0.848	1.129	1.09574	0.679303
	SPBC2F12.10	SPBC2F12.10	1.1	1.207		1.07868	1.0636
rpb11	SPAC3A12.07	SPAC3A12.07;rpb11	1.034	0.848	0.912	1.23403	0.819116
	SPBP8B7.10c	SPBP8B7.10c	0.99	0.634	0.932	0.841874	0.993931
matmi;matM;matmi_1;matMi;mat1-Mi;mat1-Mm;mat1-M;matMm	SPBC1711.01c	NULL_SPBC23G7.17c;SPBC1711.01c;matmi;matM;matmi_1;matMi;mat1-Mi;mat1-Mm;mat1-M;matMm	0.972			0.524216	0.524216
	SPBC19C2.15c	SPBC19C2.15c;SPBC2F12.16	1.161	0.87	1.145	1.34839	1.18293
erg2	SPAC20G8.07c	SPAC20G8.07c;erg2	0.979	0.608	0.884	0.972901	0.957621
nup131;Nup133a	SPBP35G2.06c	SPBP35G2.06c;nup131;Nup133a	1.241		0.997	0.96322	0.818169
	SPAC25G10.01	SPAC25G10.01;SPAC2C4.18	1.021	1.027	1.185	0.930227	0.724095
	SPAC24C9.12c	SPAC24C9.12c	0.787	1.074	0.615	0.971158	1.04772
ydc2;cce1	SPAC25G10.02	SPAC25G10.02;ydc2;cce1			1.321	1.29738	1.65953
	SPCC320.03	SPCC320.03	1.155	1.18	1.225	1.47662	1.42806
zip1	SPAC25G10.03	SPAC25G10.03;zip1	1.044	0.991	0.908	1.0606	0.9492
	SPCC5E4.10c	SPCC5E4.10c	1.081	1.28	0.923	1.50252	1.32206
	SPCC126.04c	SPCC126.04c	0.891	0.971		0.88644	0.88623
	SPCC320.05	SPCC320.05	1.08	0.945	0.639	0.932662	0.971957
	SPCC320.06	SPCC320.06	1.122	0.967	0.977	0.673256	1.151
	SPBC3D6.08c	SPBC3D6.08c	0.996	0.735	0.943	0.886124	1.02703
	SPAC17A2.07c	SPAC17A2.07c	0.881		0.876	0.301368	1.24898
	SPCC320.08	SPCC320.08	0.828	0.881	0.982	0.881419	0.854043
gps2	SPBC365.14c	SPBC365.14c;gps2	0.859	0.867	0.791	0.874364	0.570819
prt1;tif34;eif3b	SPAC25G10.08	SPAC25G10.08;prt1;tif34;eif3b	0.925	1.001	1.082	0.914734	1.02002
hem15	SPCC320.09	SPCC320.09;hem15				1.039	1.13799
Pol-gamma;mip1	SPCC24B10.22	SPCC24B10.22;SPCPB16A4.01;Pol-gamma;mip1			1.214	0.985923	1.10079
	SPAP27G11.07c	SPAP27G11.07c	1.081	0.907	1.053	1.18365	1.08012
	SPCC63.03	SPCC63.03	1.125	0.961	1.018	1	1.05386
	SPCC63.05	SPCC63.05			0.923	0.39878	0.971194
	SPCC63.06	SPCC63.06	1.074	0.949	1.089	1.00707	0.88502
	SPCC63.07	SPCC63.07	0.921		1.11	1.11853	1.22119
	SPNCRNA.90	SPNCRNA.90
	SPNCRNA.91	SPNCRNA.91
	SPNCRNA.96	SPNCRNA.96
srp1	SPBC11C11.08	SPBC11C11.08;srp1	0.89	0.966	0.996	1.08166	0.976459
srp2	SPAC16.02c	SPAC16.02c;srp2	0.86	1.254	0.946	0.949059	0.830226
	SPNCRNA.99	SPNCRNA.99
pol5	SPBC14C8.14c	SPBC14C8.14c;pol5	1.074	0.837	1.011	0.761753	0.961982
	SPBC1861.04c	SPBC1861.04c	1.183	1.18	0.969	0.754182	0.904855
	SPAC20G8.08c	SPAC20G8.08c	1.108	0.944	1.226	0.954453	1.11061
	SPCC320.12	SPCC320.12;SPCC330.17c	1.051	0.925	1.149	1.37563	1.50319
mrp10	SPAC24C9.13c	SPAC24C9.13c;mrp10	1.017	0.87	0.96	1.25147	1.22947
mrpl17	SPCC126.05c	SPCC126.05c;mrpl17	1.189	1.055	1.069	1.02408	1.00302
	SPCC320.14	SPCC320.14;SPCC330.15c	1.18	1.023	1.282	0.530122	0.358127
	SPAC17A2.08c	SPAC17A2.08c	1.159	0.927	0.888	0.541383	0.784965
	SPBC887.18c	SPBC887.18c			0.888	1.33952	0.880219
	SPAC1B9.03c	SPAC1B9.03c;SPAC6B12.01	0.955	0.813	1.229	0.760156	0.899943
rng5;myo2	SPCC645.05c	SPCC645.05c;rng5;myo2	0.961	1.028	0.947	0.778958	0.981169
	SPCC74.04	SPCC74.04	1.081	1.203	1.054	1.2651	1.07437
idi1	SPBC106.15	SPAC19G10.15C;SPBC106.15;idi1	0.936	1.054	1.065	0.994672	1.19109
	SPAC22A12.14c	SPAC22A12.14c	1.16	1.048	1.118	0.724076	0.946526
mcs2	SPBP16F5.02	SPBP16F5.02;mcs2		0.954	1.028	1.1872	1.2589
	SPCC74.09	SPCC10D6.01c;SPCC74.09	0.889		0.963	1.57074	1.37587
elp3;mcs4	SPBC887.10	SPBC887.10;elp3;mcs4			0.905	0.90051	0.996024
	SPBC4.01	SPBC4.01				1.45473	1.3625
	SPBC4.02c	SPBC4.02c	0.911		0.972	0.857147	0.886593
lyn1	SPBC16A3.03c	SPBC16A3.03c;lyn1				0.833207	0.740549
	SPBC1271.04c	SPBC1271.04c	1.123	1.147	1.273	1.07005	1.06744
	SPBC4.03c	SPBC4.03c	0.979	1.147	0.992	0.924802	0.97338
	SPBC16E9.09c	SPBC16E9.09c	0.934	0.827	1.042	1.04646	1.1501
	SPBC4.06	SPBC4.06	1.043	1.28	1.042	1.07379	1.07232
	SPBC1306.02	SPBC1306.02;SPBC4.08	1.113	1.656	1.356	1.07247	1.34284
	SPAC4F8.03	SPAC4F8.03;SPAC644.01c	1.108	0.968	1.223	1.12707	1.03215
pi066	SPBC27B12.12c	SPBC27B12.12c;pi066	1.154	0.899	0.988	0.959808	0.937736
	SPAC4F10.19c	SPAC4F10.19c	0.749		1.091	1.01535	1.02138
cek1	SPCC1450.11c	SPCC1450.11c;cek1	0.95	1.006	0.989	0.792645	0.605355
	SPAC3H8.08c	SPAC3H8.08c	1.079	1.117	0.945	1.09221	0.8514
gmh2	SPAC5H10.13c	SPAC5H10.13c;gmh2	1.178	1.047	1.306	1.08229	0.949612
	SPAC13F5.03c	SPAC13F5.03c	1.068	0.867	1.162	0.890332	0.472114
hos2;dad2	SPAC1805.07c	SPAC1805.07c;hos2;dad2				0.954686	0.951678
	SPBC1A4.06c	SPBC1A4.06c			1.037	1.03435	1.07968
tfa1	SPAC458.07	SPAC458.07;SPAPYUG7.01;tfa1	0.325	1.369	1.072	0.848114	1.09027
tfa2	SPCC1672.08c	SPCC1672.08c;tfa2	1.011	0.873	0.874	0.80957	0.903854
pi001;pht1;cdc2L	SPBC11B10.10c	SPBC11B10.10c;pi001;pht1;cdc2L	2.028	1.489	2.121	1.67261	1.32091
	SPAC11D3.05	SPAC11D3.05			1.08	0.517967	0.288852
	SPAC11D3.06	SPAC11D3.06				1.14521	1.37878
vti1	SPBC3B9.10	SPBC3B9.10;vti1	0.944	1.074	0.933	0.792475	0.879694
	SPBC1271.05c	SPBC1271.05c			1.061	0.95765	0.452011
	SPAC11D3.09	SPAC11D3.09				1.1795	1.1795
mor2;cps12	SPBP19A11.04c	SPBP19A11.04c;mor2;cps12	1.042	0.864	1.074	0.74844	0.820982
	SPCC13B11.04c	SPCC13B11.04c;SPCC777.01c	0.969		0.843	1	1
	SPAC3H8.09c	SPAC3H8.09c			1.089	0.94001	1.16803
	SPBC12C2.05c	SPBC12C2.05c	1.111	0.96	1.253	1.03709	1.22961
	SPAC13F5.04c	SPAC13F5.04c	1.054	1.039	0.904	1	1
	SPBC16H5.04	SPBC16H5.04	1.059	0.909	1.054	1.1001	1.16569
	SPBC11G11.07	SPBC11G11.07;SPBC18H10.01	0.995	0.967	1.1	0.931213	1.18415
lcf1	SPBC18H10.02	SPBC18H10.02;lcf1	1.016	1.199	0.914	1.09742	1.10567
	SPAC4H3.07c	SPAC4H3.07c	1.041	1.009	1.127	1.00377	1.00377
rpl34-2;rpl3402;rpl34	SPCC1322.15	SPCC1322.15;rpl34-2;rpl3402;rpl34	0.951	0.948	1.029	0.884926	0.939799
	SPBC18H10.05	SPBC18H10.05			1.173	1.03288	1.01022
	SPAC11D3.10	SPAC11D3.10	1.208		1.035	0.936965	1.01002
	SPBC18H10.07	SPBC18H10.07			1.251	1.28298	1.40304
	SPBC1A4.07c	SPBC1A4.07c	0.965	1.099	1.119	0.887814	0.916856
	SPAC11D3.13	SPAC11D3.13			1.07	3.57812	4.06089
	SPBC18H10.09	SPBC18H10.09			0.942	1.37174	1.56048
	SPAC11D3.15	SPAC11D3.15	0.831	0.994	1.003	0.899131	0.95896
atp10	SPAC4G8.11c	SPAC4G8.11c;atp10				1.27703	1.34983
	SPAC11D3.17	SPAC11D3.17			0.634	1.02199	0.65163
	SPBC1271.06c	SPBC1271.06c				1	1
qcr6	SPBC16C6.08c	SPBC16C6.08c;qcr6	1.015	0.858	1.199	0.778666	0.883504
cwf23	SPCC10H11.02	SPCC10H11.02;SPCP31B10.01;cwf23	1.031	1.196	1.084	0.575184	0.959812
mrp7	SPAP19A11.05c	SPAP19A11.05c;mrp7	0.997		0.952	1.15068	1.28446
hri1	SPAC20G4.03c	SPAC20G4.03c;hri1			0.721	0.737048	0.474353
ppk16	SPAC890.03	SPAC890.03;ppk16		0.967	1.02	0.80898	1.04782
	SPCP31B10.02	SPCP31B10.02	0.968	1.808	1.226	0.883279	0.920497
	SPBC902.03	SPBC902.03			1.036	1.15096	0.898277
	SPBC902.04	SPBC902.04	1	0.886	0.989	0.856764	0.860108
	SPAC890.05	SPAC890.05	0.881	1.135	1.117	0.817541	1.10964
	SPCP31B10.04	SPCP31B10.04	1.026	0.926	1.109	1.09498	1.2262
mex67	SPBC1921.03c	SPBC1921.03c;mex67	1.063	1.058	0.896	0.970823	0.978715
did4	SPAC4F8.01	SPAC4F8.01;SPAC644.03c;did4	1.147	1.027	1.128	1.05859	1.21045
	SPAC890.06	SPAC890.06	1.021	0.961	0.987	0.947882	0.983197
	SPCP31B10.05	SPCP31B10.05		1.1	1.048	1.12178	0.996263
mto2	SPBC902.06	SPBC902.06;mto2	0.966	0.875	0.815	1.18099	0.886617
	SPAC25H1.08c	SPAC25H1.08c	1.479	1.146	1.801	1.02586	1.25935
	SPCP31B10.06	SPCP31B10.06	1.111	0.822	0.58	0.743655	0.958934
	SPBC1289.13c	SPAC31D3.01;SPBC1289.13c	1.167	0.98	1.043	1.25451	1.40611
	SPBC3B8.03	SPBC3B8.03	1.086	1.305	0.865	1.02118	1.03661
	SPBC16H5.13	SPBC16H5.13	1.178	1.133	0.923	0.859069	0.952399
cdc48	SPAC1565.08	SPAC1565.08;SPAC6F12.01;cdc48	0.834	1.292	0.79	1.04334	1.1281
	SPBC3B8.05	SPBC3B8.05		0.987	1.125	1.03378	1.03378
	SPBC3B8.06	SPBC3B8.06				0.968367	0.866563
	SPBC16H5.15	SPBC16H5.15			1.265	1.42081	1.73331
vma1	SPAC343.05	SPAC343.05;vma1	0.947	1.121	0.922	0.990501	1.08156
	SPCC895.03c	SPCC895.03c	1.082	1.052	0.983	0.941886	0.975039
vma2	SPAC637.05c	SPAC637.05c;vma2	0.963	0.857	0.909	0.968472	0.915884
	SPAC6F12.04	SPAC6F12.04	0.897	0.802	0.975	0.782294	0.609993
	SPBC3B8.08	SPBC3B8.08	1.026	0.836	0.989	1.44132	1.70673
tim44	SPBC14C8.02	SPBC14C8.02;tim44	0.978	0.861	1.121	1.06781	0.576487
vma3	SPAC1B3.14	SPAC1B3.14;vma3	0.96	1.019	1.004	0.940706	0.960284
	SPBC3B8.09	SPBC3B8.09	0.892	1.299	1.283	0.728608	0.905068
	SPBC14C8.03	SPBC14C8.03	1.012	0.942	0.927	0.994855	0.945476
ppk23	SPBC18H10.15	SPBC18H10.15;ppk23	1.1	0.882	0.963	1.37789	1.34194
rdi1	SPAC6F12.06	SPAC6F12.06;rdi1	1.092	0.876	1.088	1.0876	1.37964
	SPBC14C8.04	SPBC14C8.04	0.954	0.912	0.953	1.0158	0.934681
	SPBC18H10.16	SPBC18H10.16	1.015	1.31	1.29	1.08011	1.00216
	SPAC1805.09c	SPAC1805.09c				1.21983	1.28367
tom20	SPAC6F12.07	SPAC6F12.07;tom20	1.03	0.714	0.948	0.97129	0.947801
rpl44;c2E11.04;rpl28;rpl28B11.03c	SPAC1687.06c	SPAC1687.06c;rpl44;c2E11.04;rpl28;rpl28B11.03c	0.978	0.829	0.986	0.957084	0.996241
rdp1;rdr1	SPAC6F12.09	SPAC6F12.09;rdp1;rdr1			0.883	0.871537	0.914521
	SPBC18H10.19	SPBC18H10.19	1.015	0.879	0.939	0.961841	1.14656
	SPAC22A12.17c	SPAC22A12.17c			1.129	1.31052	0.713542
	SPAC4G8.12c	SPAC4G8.12c	1.007	0.605	0.854	1.57767	1.74097
ubi1;rpl40	SPAC11G7.04	SPAC11G7.04;ubi1;rpl40	0.816	1.199	0.929	0.941076	1.00334
	SPBC1271.07c	SPBC1271.07c	0.795	0.9	0.623	0.836202	0.557244
rps31;ubi3	SPAC6G10.11c	SPAC6G10.11c;rps31;ubi3	0.936	0.954	1.026	0.884053	0.994831
ubi4	SPBC337.08c	SPBC337.08c;ubi4	0.893	0.91	0.866	0.801267	0.968193
	NULL_matpc	NULL_matpc
orc6	SPBC2A9.12	SPBC2A9.12;SPBC2D10.02;orc6		0.891	1.037	0.989386	1.20432
	SPCC2H8.02	SPCC2H8.02	1.165	1.102	1.338	0.666943	0.665998
ure1;ure2	SPAC1952.11c	SPAC1952.11c;ure1;ure2	1.04	1.182	1.084	1.11381	1.14296
	SPCC2H8.03	SPCC2H8.03	0.984	1.056	1.161	0.579115	0.74825
	SPCC2H8.04	SPCC2H8.04	1.061	1.139	0.969	0.809187	1.00981
	SPAP27G11.08c	SPAP27G11.08c	1.084			1.00772	1
	SPCC63.13	SPCC63.13	2.987	2.908	2.987	0.903024	1.02336
	SPCC63.14	SPCC63.14	1.596	1.735	0.966	1.55363	1.79373
	SPCC1259.02c	SPCC1259.02c	1.04	0.905	1.174	0.848791	0.905921
	SPBC106.11c	SPBC106.11c			1.084	1.27007	1.67439
pom1	SPAC2F7.03c	SPAC2F7.03c;pom1	1.037	1	0.935	1.12548	0.944637
sma3;fta3	SPBP8B7.12c	SPBP8B7.12c;sma3;fta3		1.13	1.159	0.779532	0.76856
	SPAC20G8.09c	SPAC20G8.09c	0.996	1.237	1.245	0.835155	1.04777
	SPBP35G2.08c	SPBP35G2.08c	1.037		1.068	0.782619	0.93796
mrpl7	SPBC2F12.02c	SPBC2F12.02c;mrpl7			0.814	1.03778	1.06868
	SPAP27G11.09c	SPAP27G11.09c	0.921	1.037	1.025	0.877578	0.679714
	SPBC106.12c	SPBC106.12c			1.197	1.66563	1.31839
rec25;mug19	SPAC17A5.18c	SPAC17A5.18c;rec25;mug19				0.776568	0.713003
	SPAC15E1.02c	SPAC15E1.02c			1.127	0.529193	0.367218
nhp2	SPAC1782.10c	SPAC1782.10c;nhp2	0.822	0.875	1.084	0.909884	1.00239
	SPCC126.07c	SPCC126.07c	1.003	0.895		0.806768	0.848562
	SPBC2F12.03c	SPBC2F12.03c			0.854	0.813491	1.08294
	SPBC4C3.04c	SPBC4C3.04c	0.939		1.111	1.24812	0.877614
	SPAPJ695.01c	SPAPJ695.01c				1	1
fmn1	SPCC18.16c	SPCC18.16c;fmn1	0.974	0.78	1.103	0.850603	0.65952
snf22	SPCC1620.14c	SPCC1620.14c;SPCC830.01c;snf22	0.932	1.241	0.963	0.756659	0.850599
srs2	SPAC4H3.05	SPAC4H3.05;srs2	1.011		1.019	1.33012	1.4001
dpb2	SPBP8B7.14c	SPBP8B7.14c;dpb2	1.077	1.125	1.03	1.25208	1.33174
cox8	SPAC24C9.16c	SPAC24C9.16c;cox8	1.026	1.016	1.077	0.607516	0.665398
	SPBC29A10.16c	SPBC29A10.16c	1.044	0.785	0.939	1.0795	1.05215
	SPCC126.08c	SPCC126.08c	0.893	0.958	0.909	0.957376	1.05534
git1	SPBC21C3.20c	SPBC21C3.20c;git1	1.04	1.149	0.986	0.724668	0.670001
	SPCC18.17c	SPCC18.17c	1.175	1.059	1.374	1.46496	1.33262
his1	SPAC25G10.05c	SPAC25G10.05c;his1	0.961	0.996	0.898	1.06538	1.04531
his2	SPBC1711.13	SPBC1711.13;his2	0.933	1.141	1.051	0.962361	0.962361
cox9	SPCC1259.05c	SPCC1259.05c;cox9	0.991	0.8	1.062	0.884611	0.637734
sda1	SPBC106.14c	SPAC19G10.16;SPBC106.14c;sda1				0.685844	0.939932
his5	SPBC21H7.07c	SPBC21H7.07c;his5	1.07	0.95	1.082	1.04262	1.04276
sre2	SPBC354.05c	SPBC354.05c;sre2	0.849	0.895	0.731	0.970143	0.543893
	SPBC24C6.08c	SPBC24C6.08c			0.943	0.914825	0.965046
his6	SPAC3F10.09	SPAC3F10.09;his6	1.13	0.902	0.962	0.889661	0.974562
his7	SPBC29A3.02c	SPBC29A3.02c;his7	0.942	1.062	0.934	0.944282	0.988846
pop1;ste16	SPBC1718.01	SPBC1718.01;SPBC2G2.18;pop1;ste16				0.9318	0.979166
	SPAC22F3.11c	SPAC22F3.11c				0.813642	1.10479
	SPBP8B7.15c	SPBP8B7.15c	0.946	1.012	0.867	0.683139	0.727161
	SPAC5D6.10c	SPAC5D6.10c				1	1
U2-A	SPBC1861.08c	SPBC1861.08c;U2-A	0.989	0.779	0.912	1.3658	1.23232
cnd1	SPBC776.13	SPBC776.13;cnd1	1.049	1.119	0.961	0.850246	0.91141
	SPBC2F12.05c	SPBC2F12.05c	1.014	1.001	0.749	0.934945	0.997901
cnd2	SPCC306.03c	SPCC306.03c;cnd2	1.059	0.952	0.883	0.87419	0.896922
	SPAC1F5.11c	SPAC1F5.11c	1.022	0.903	0.941	0.63454	0.744054
	SPAC32A11.02c	SPAC32A11.02c	1.063	1.044	0.958	0.375146	0.33174
cnd3	SPCC188.03	SPAC1B9.04;SPCC188.03;cnd3	0.908		0.982	1.00515	1.024
rsm27	SPBC30D10.12c	SPBC30D10.12c;rsm27	0.902	0.708	0.985	0.961217	0.985096
ubp32;ubp11	SPBC19C2.04c	SPBC19C2.04c;ubp32;ubp11	0.974	0.839	0.96	0.846703	0.909114
	SPBC24C6.09c	SPBC24C6.09c			0.719	1.00305	0.990249
erv14	SPAC30C2.05	SPAC30C2.05;erv14	1.096	0.841	1.049	1.13548	0.838817
	SPAC15E1.05c	SPAC15E1.05c	0.997		1.068	1.07924	1.01897
srw1;ste9	SPAC144.13c	SPAC144.13c;srw1;ste9			1.567	1.25751	1.15621
sen1	SPAC6G9.10c	SPAC6G9.10c;sen1	0.948	0.711	1.262	0.917629	0.945254
twf1	SPCC126.06	SPCC126.06;twf1	1.044	0.789	1.009	1.06271	1.02099
	SPCC126.09	SPCC126.09	0.958	0.762	0.977	0.884449	0.712667
	SPAC32A11.03c	SPAC32A11.03c	1.023	1.123	0.988	0.932029	0.883343
apc1;apc10	SPBC1A4.01	SPBC1A4.01;SPBC1E8.06;apc1;apc10			0.965	1.38579	1.18763
	SPCC830.04c	SPCC830.04c				1.34478	1.79606
	SPBC354.07c	SPBC354.07c	0.955	1.036		0.950433	0.95655
erv25	SPAC23H4.03c	SPAC23H4.03c;erv25	0.948	0.945	1.048	1.06548	1.01195
	SPAC1F12.10c	SPAC1F12.10;SPAC1F12.10c	0.926	0.945	0.952	1.06993	0.935627
med7	SPBC14F5.08	SPBC14F5.08;med7	1.018	0.91	1.06	1.20473	1.89955
	SPBP8B7.17c	SPBP8B7.17c	1.051	1.221	1.037	0.934518	1.11307
rap1	SPBC1778.02	SPBC1778.02;rap1		1.564	1.048	1.45435	1.62529
	SPCC126.12	SPCC126.12	1.069	1.04	1.211	1.11283	1.17768
	SPBC582.04c	SPAC19G10.08;SPBC582.04c	1.013		1.033	0.9112	1.04132
	SPAC29B12.10c	SPAC29B12.10c	0.851	1.04	0.689	1.67575	1.94309
sam50	SPAC17C9.06	SPAC17C9.06;sam50	1.03	1.042	1.092	1.07937	0.867137
	SPBC1778.07	SPBC1778.07	1.299	1.169	1.278	0.990928	1.12056
alg8	SPAC17C9.07	SPAC17C9.07;alg8	0.939	1.098	0.903	1.09717	1.13946
nuc1;pnu1	SPAC17C9.08	SPAC17C9.08;nuc1;pnu1	1.209	1.06	1.26	1.4076	1.37535
	SPBC1778.09	SPBC1778.09				1.36684	1.3168
rpl27-1;rpl2701	SPBC685.07c	SPBC685.07c;rpl27-1;rpl2701	0.912	0.904	0.957	0.990991	1.02951
ppk5	SPAC16C9.07	SPAC16C9.07;SPAC2G11.01;ppk5	1.018		1.029	0.876569	1.04234
	SPAC2G11.02	SPAC2G11.02	0.953	1.034	1.168	1.11383	1.25328
	SPAC2G11.04	SPAC2G11.04	1.102	0.832	0.973	1.21411	1.34151
	SPCC830.05c	SPCC830.05c	0.855		0.974	1.08856	0.905022
	SPBC19C2.06c	SPBC19C2.06c			1.042	18.606	17.5457
	SPBC106.17c	SPAC19G10.13;SPBC106.17c	1	1.138	0.784	2.44063	1.89056
cut5;dre3;rad4	SPAC23C4.18c	SPAC23C4.18c;cut5;dre3;rad4	1.062	1.096	1.018	1.01023	1.32942
	SPBC354.08c	SPBC354.08c		0.96	0.886	1.08249	0.827191
	SPAC2G11.09	SPAC2G11.09	0.85	0.894	0.796	0.954848	1.01184
rad60	SPBC1921.02	SPBC1921.02;rad60		0.929	0.823	0.930366	0.956494
mor4;nak1;orb3	SPBC17F3.02	SPBC17F3.02;mor4;nak1;orb3	0.99	0.93	0.97	0.922127	0.922422
mug159;moa1	SPAC15E1.07c	SPAC15E1.07c;mug159;moa1				1	1
mlo2	SPBC4.05	SPBC4.05;mlo2			1.143	1.07429	1.10432
	SPBP8B7.18c	SPBP8B7.18c	0.856	0.873	1.259	1.16724	1.0999
rai1;mlo3	SPBC1D7.04	SPBC1D7.04;SPBC1D7.04c;rai1;mlo3	0.93	0.832	0.839	0.939311	0.852011
hsp70B39.11c;ssa1;hsp70	SPAC13G7.02c	SPAC13G7.02c;hsp70B39.11c;ssa1;hsp70	0.911	1.157	0.684	2.72291	2.76952
	SPAC23G3.10c	SPAC23G3.10c	1.085	0.888	0.987	1.07567	1.1742
	SPAC17C9.12	SPAC17C9.12	1.075	0.822	0.728	0.885049	0.938323
	SPAC29B12.11c	SPAC29B12.11c	1.063	0.963		1.06894	0.876238
	SPCC1682.06	SPCC1682.06	0.932	1.143	1.065	0.773778	0.651128
	SPCC1827.04	SPCC1827.04	1.252	1.246	1.125	0.779208	1.15857
fkbp39	SPBC1347.02	SPBC1347.02;fkbp39	0.996	1.333	1.513	0.982111	1.03291
	SPAC1687.23c	SPAC1687.23c				1	1
HAG604;mst2	SPAC17G8.13c	SPAC17G8.13c;HAG604;mst2			0.864	0.410859	0.336134
	SPAPB24D3.05c	SPAPB24D3.05c				1.23644	1.07952
	SPAC27D7.02c	SPAC27D7.02c	1.076	0.926	0.899	1.02177	0.9668
mis14	SPAC688.02c	SPAC688.02c;mis14			0.817	1.11695	1.10228
cor1	SPAC11E3.08c	SPAC11E3.08c;cor1	1.116	0.98	0.899	0.985783	1.11395
bms1	SPBC31E1.06	SPBC31E1.06;SPBC800.01;bms1	0.914	1.013	1.155	0.654344	0.91579
rps2	SPCC576.08c	SPCC576.08c;rps2	0.942	1.19	0.925	0.941928	1.01213
whi5	SPBC800.02	SPBC800.02;whi5				0.865094	1.35989
snm1;pac1;hcs	SPBC119.11c	SPBC119.11c;snm1;pac1;hcs	1.129	1.264	1.035	1.06586	0.842832
rps3	SPBC16G5.14c	SPBC16G5.14c;rps3	0.844	0.875	0.882	0.956574	0.98699
sly1	SPCC74.01	SPCC74.01;sly1	0.976	0.92	1.086	1.13945	1.14744
rps5	SPAC8C9.08	SPAC8C9.08;rps5	0.943	0.692	0.904	0.989252	0.993507
brx1	SPBC800.06	SPBC800.06;brx1	0.983	0.912	1.294	1.06888	1.06106
rps7	SPAC18G6.14c	SPAC18G6.14c;rps7	0.894	1.124	0.95	0.95256	0.983943
gcd10;tif35	SPBC800.08	SPBC800.08;gcd10;tif35	0.961	0.803	1.144	0.844615	0.976516
	SPCC4G3.11	SPCC4G3.11	0.995		1.027	1.1387	1.2376
	SPBC25H2.10c	SPBC25H2.10c	0.807		1.094	0.969288	1.02655
mdj1	SPCC4G3.14	SPCC4G3.14;mdj1	0.97	1.005	1.009	1.21558	1.39505
	SPAC8F11.04	SPAC8F11.04	0.943	1.067	1.256	0.898459	1.00938
	SPAC959.06c	SPAC959.06c				1.3866	2.31489
pex14	SPBC13G1.03c	SPBC13G1.03c;pex14			1.039	0.975613	1.19928
HST2;hst2	SPCC132.02	SPCC132.02;HST2;hst2	0.96	1.09	1.16	0.804943	1.03133
	SPCC4G3.16	SPCC4G3.16	0.942		1.012	0.732793	0.64002
	SPCC1223.14	SPCC1223.14;SPCC297.01	0.968	1.157	1.07	1.01234	0.974329
	SPCC132.03	SPCC132.03	1.15	0.995	1.077	1.13648	1.06702
	SPAC8F11.06	SPAC8F11.06			1.036	1.04333	1.14381
	SPCC4G3.17	SPCC4G3.17	0.978	0.952	1.161	0.917947	1.02693
taz1;MYB;myb1;myb	SPAC16A10.07c	SPAC16A10.07c;taz1;MYB;myb1;myb			0.862	1.03904	1.33327
	SPCC4G3.18	SPCC4G3.18	0.986	0.97	1.183	0.860851	1.06944
	SPAPB24D3.06c	SPAPB24D3.06c	1.086	0.865	1.078	0.978397	0.978397
	SPBPB21E7.04c	SPAPB21E7.04c;SPBPB21E7.04c				0.0880246	0.0185644
	SPCC16C4.02c	SPCC16C4.02c	0.848	1.084	1.083	0.663494	0.468039
prp15;cwf6;spp42	SPAC4F8.12c	SPAC4F8.12c;prp15;cwf6;spp42	1.067	0.934	1.013	0.952379	0.90613
	SPAC688.03c	SPAC688.03c			1.044	1.14755	0.986842
lcb2;lcb2B1E11.07	SPAC21E11.08	SPAC21E11.08;SPAC2C4.02;lcb2;lcb2B1E11.07	0.945	1.135	1.012	0.794464	0.836918
	SPAC11D3.07c	SPAC11D3.07c			0.897	0.802446	1.16709
	SPBC800.11	SPBC800.11	0.96		0.975	1.36966	1.28295
rpt1	SPBC16C6.07c	SPBC16C6.07c;rpt1	0.961	1.04	0.984	0.926085	1.00922
rpt3	SPCC576.10c	SPCC576.10c;rpt3	0.954	1.047	0.902	1.10236	1.21205
	SPBC800.13	SPBC800.13				1.13272	1.21244
rpt4	SPCC1682.16	SPCC1682.16;SPCC306.01;rpt4	0.956	1.092	0.894	0.978348	1.16956
	SPAC1B3.15c	SPAC1B3.15c	0.94	0.933	0.96	0.600981	0.675782
	SPBC25H2.11c	SPBC25H2.11c			0.964	0.916738	0.973022
	SPBC13G1.04c	SPBC13G1.04c	1.044	1.06	1.418	1.0617	1.13264
wtf8	SPCC306.10	SPCC306.10;wtf8
	SPAPB24D3.07c	SPAPB24D3.07c	3.371	1.781	11.371	0.850082	0.708467
rik1	SPCC11E10.08	SPCC11E10.08;rik1	1.011	0.998	1	0.861549	0.960295
	SPBC1921.04c	SPBC1921.04c				0.517772	1.02436
gst3;GSTIII	SPAC688.04c	SPAC688.04c;gst3;GSTIII				0.531495	0.362036
npp106	SPCC1739.14	SPCC1739.14;npp106	1.093	1.003	1.081	1.12868	1.3601
	SPAC11D3.08c	SPAC11D3.08c	1.01	1.07	0.95	0.937905	0.881133
	SPRRNA.01	SPRRNA.01
	SPRRNA.02	SPRRNA.02
	SPRRNA.03	SPRRNA.03
	SPRRNA.04	SPRRNA.04
	SPRRNA.05	SPRRNA.05
	SPRRNA.06	SPRRNA.06
	SPRRNA.07	SPRRNA.07
vht1	SPAC1B3.16c	SPAC1B3.16c;vht1	1.056	1.442	0.952	1.02151	1.05254
	SPRRNA.08	SPRRNA.08
	SPRRNA.09	SPRRNA.09
spqM;yL9;rpl10-1;RL10;rpl1001;rpl10	SPBC18E5.04	SPBC18E5.04;spqM;yL9;rpl10-1;RL10;rpl1001;rpl10	0.966	1.102	0.948	0.98381	1.03329
rpl10-2;rpl1002;rpl10	SPAP7G5.05	SPAP7G5.05;rpl10-2;rpl1002;rpl10	0.941	1.089	0.97	1.00343	1.00343
	SPAC3G6.05	SPAC3G6.05	0.884	1.033	0.895	1.07719	1.03791
N150;n150	SPAC31G5.12c	SPAC31G5.12c;N150;n150		1.083	1.063	1.82485	1.2652
	SPAC3G6.07	SPAC3G6.07			0.846	0.97411	1
erv1	SPAC3G6.08	SPAC3G6.08;erv1	0.981	1.172	1.057	1.19556	0.955393
	SPAC7D4.02c	SPAC7D4.02c			0.889	1.10373	1.20033
	SPAPB24D3.08c	SPAPB24D3.08c	0.896	1.053	1.407	1.0607	1.11544
ulp1	SPBC19G7.09	SPBC19G7.09;ulp1	1.204		1.044	0.831465	0.773445
ulp2	SPAC17A5.07c	SPAC17A5.07c;ulp2	1.121	1.019	0.883	0.834499	0.971852
	SPCC417.11c	SPCC417.11c		1.041	0.878	0.622382	0.660811
apc14;omt1	SPAC27D7.05c	SPAC27D7.05c;apc14;omt1		1.162	0.948	0.911752	0.868166
	SPBC32F12.10	SPBC32F12.10	0.938	1.234	0.872	0.879288	0.861273
	SPRRNA.11	SPRRNA.11
	SPRRNA.12	SPRRNA.12
pcr1;mts2	SPAC21E11.03c	SPAC21E11.03c;pcr1;mts2	0.965	0.908	0.944	0.780866	0.449983
	SPRRNA.13	SPRRNA.13
	SPRRNA.14	SPRRNA.14
tfb5	SPBC32F12.15	SPBC32F12.15;tfb5	1.204		1.007	1.04934	1.02405
	SPRRNA.15	SPRRNA.15
	SPRRNA.16	SPRRNA.16
	SPRRNA.17	SPRRNA.17
	SPRRNA.18	SPRRNA.18
	SPRRNA.19	SPRRNA.19
	SPAC23D3.03c	SPAC23D3.03c	1.093	1.017	1.028	0.990222	0.995925
	SPAC3G6.11	SPAC3G6.11	1.19	1.258	1.026	1.27089	1.43822
	SPBC13G1.06c	SPBC13G1.06c			0.969	0.894837	0.8463
	SPBP19A11.01	SPBP19A11.01	0.936	1.004	0.881	1.27189	1.10032
exo70	SPBC106.20	SPAC19G10.10c;SPBC106.20;SPBC582.02;exo70			1.019	1.12605	1.04831
kin2;ppk25	SPBC32C12.03c	SPBC32C12.03c;kin2;ppk25	1.682	1.372	1.766	2.34726	2.07588
ste4	SPAC1565.04c	SPAC1565.04c;ste4	0.774	0.762		0.142539	0.110938
ste6;ste6B3B11.02c	SPCC1442.01	SPCC1442.01;SPCC1450.17;ste6;ste6B3B11.02c			3.784	5.7846	6.90255
	SPAC7D4.03c	SPAC7D4.03c	1.046	0.884	1.077	0.755062	0.649469
	SPAPB24D3.09c	SPAPB24D3.09c	0.935	1.028	0.887	1.16127	1.03775
ste7	SPAC23E2.03c	SPAC23E2.03c;ste7			0.714	0.4426	0.337142
pvg3	SPBC1921.06c	SPBC1921.06c;pvg3			0.856	1.06607	1.00781
atg1;ppk36	SPCC63.08c	SPCC63.08c;atg1;ppk36	0.955	1.165	0.96	1.20848	1.33377
	SPRRNA.20	SPRRNA.20
	SPAC15F9.01c	SPAC15F9.01c			1.141	0.62429	0.467798
	SPBC365.09c	SPBC365.09c			1.055	0.934795	1.0406
gln1	SPAC23H4.06	SPAC23H4.06;gln1	1.015	1.176	1.049	0.984642	1.03494
tpi;tpi1	SPCC24B10.21	SPCC24B10.21;tpi;tpi1	0.936	1.28	1.091	1.03586	1.08352
	SPBC337.10c	SPBC337.10c	0.942	0.986	1.189	1.23322	1.03803
tim11	SPBC106.05c	SPBC106.05c;tim11	0.926	1.017	1.059	0.877309	0.790702
	SPCC1183.11	SPCC1183.11;SPCC31H12.01	0.805	1.128	0.846	0.576171	0.621698
	SPBC18A7.02c	SPBC18A7.02c	1.001	0.938	1.018	0.991551	1
	SPAC23H4.11c	SPAC23H4.11c				1.07695	1.12963
	SPBC216.01c	SPBC216.01c;SPBC713.13c	0.989	1.26	1.034	1.08114	1.12564
srb11	SPBC12D12.06	SPBC12D12.06;srb11		1.158	1.347	0.921327	0.952885
	SPCC31H12.06	SPCC31H12.06	0.947	1.032	0.854	1.0937	1.08477
	SPAC139.03	SPAC139.03				1.08549	1.02612
	SPAC12D12.09	SPAC12D12.09	1.033	0.905	1.016	1.15017	1.23798
	SPAC139.05	SPAC139.05			1.022	0.932409	0.645241
nup61	SPCC18B5.07c	SPBC18B5.07c;SPCC18B5.07c;nup61	1.159	1.017	0.997	1.16006	1.127
	SPBC29A3.13	SPBC29A3.13;SPBC29A3.13c	1.03	1.8	1.087	1.45063	1.41411
	SPAC977.14c	SPAC977.14c	0.856	1.31	1.47	0.933642	1.02136
	SPBC29A3.16	SPBC29A3.16	0.974	0.859	1.203	1.07496	1.02043
gef3	SPBC29A3.17	SPBC29A3.17;gef3	1.011	1.061	0.971	1.72541	0.957281
cyt1	SPBC29A3.18	SPBC29A3.18;cyt1	1.073	0.989	0.901	0.879993	0.807245
pta1	SPAC1071.01c	SPAC1071.01c;SPAC4H3.15c;pta1	0.846	0.73	0.948	1.16122	1.26748
	SPAC22H12.05c	SPAC22H12.05c	1.04	0.905	0.985	0.700744	0.72396
	SPAC18B11.09c	SPAC18B11.09c			1.138	0.999619	0.871379
	SPAC10F6.17c	SPAC10F6.17c;SPAC56E4.01c	1.026	1.137	0.989	0.903819	0.953026
rpl21-2;rpl21;rpl2102	SPAC959.08	SPAC959.08;rpl21-2;rpl21;rpl2102	0.832	1.196	0.985	0.950552	1.00771
vma7	SPBC3B9.18c	SPBC3B9.18c;vma7	1.066	1.148	1.003	0.954979	0.975852
	SPBC21C3.12c	SPBC21C3.12c	1.098	0.758	0.935	0.900367	0.961006
ppk38	SPCP1E11.02	SPCP1E11.02;ppk38	0.941	0.959	0.976	0.842825	0.938119
	SPCP1E11.03	SPCP1E11.03				0.722866	1.25892
alg5	SPBC56F2.10c	SPBC56F2.10c;alg5	1	1.035	0.917	1.03487	0.943245
ypt1	SPBC1703.10	SPBC1703.10;ypt1	0.972	0.777	0.983	0.856305	0.922163
ypt2	SPAC9E9.07c	SPAC9E9.07c;ypt2	0.965	1.205	0.944	1.17421	0.841883
its5;ypt3	SPAC18G6.03	SPAC18G6.03;its5;ypt3	0.883	0.992	0.956	1.0033	0.988174
ypt4	SPAC1B3.11c	SPAC1B3.11c;ypt4				0.750882	0.631435
	SPCC18.09c	SPCC18.09c			0.964	0.955965	0.841009
	SPCP1E11.08	SPCP1E11.08	0.939	0.879	1.205	0.999981	0.960776
dga1	SPCC1235.15	SPCC1235.15;SPCC548.01;dga1	0.866	0.978	0.952	0.946307	0.922592
	SPBC30D10.03c	SPBC30D10.03c	0.976	1.207	1.08	1.00856	0.96585
ypt5	SPAC6F6.15	SPAC6F6.15;ypt5	0.989	0.834	0.908	1.0351	0.86613
rad35;him1;dfp1	SPCC550.13	SPCC550.13;rad35;him1;dfp1	1.1	1.14	1.141	1.38222	1.27262
ypt7	SPBC405.04c	SPBC405.04c;ypt7	0.928	0.772	0.771	0.748995	0.78768
	SPCC548.04	SPCC548.04	0.932	0.936	0.955	0.899123	0.78911
orb5;cka1	SPAC23C11.11	SPAC23C11.11;orb5;cka1	1	0.985	0.954	1.12696	1.04057
	SPAC57A7.07c	SPAC57A7.07c	1.081	0.968	1.177	1.16266	1.08786
	SPBC1711.15c	SPBC1711.15c	1.241	0.749	1.028	0.507328	0.358937
	SPBC1709.02c	SPBC1709.02c;SPBC1734.18c	0.861	1.343	0.926	1.01405	1.06637
	SPBC29A3.21	SPBC29A3.21	1.143	1.321	1.218	0.881114	0.902068
	SPCC18B5.08c	SPBC18B5.08c;SPCC18B5.08c	1.008			0.989061	1.02308
cyp2;cyp1	SPAC57A10.03	SPAC57A10.03;cyp2;cyp1	1.077	1.04	1.367	1.25993	1.17101
	SPAC57A10.04	SPAC57A10.04				1	1
rdh54	SPAC22F3.03c	SPAC22F3.03c;rdh54	1.278	1.104	1.012	1.145	1.12225
	SPAC57A10.06	SPAC57A10.06			1.406	1.02615	1.10622
set6	SPBP8B7.07c	SPBP8B7.07c;set6	0.939	0.717	0.769	1.23638	1.20689
	SPAC5D6.02c	SPAC5D6.02c	1.282		0.985	1.09284	1.46536
	SPAC57A10.07	SPAC57A10.07	1.488	0.947		1.29647	1.14352
	SPBC29A10.09c	SPBC29A10.09c				0.956901	1.17046
etd1	SPAC1006.08	SPAC1006.08;etd1			0.761	0.939445	1.25416
	SPAC6G9.01c	SPAC6G9.01c	1.056	0.993	1.195	0.953883	0.846504
	SPAC343.19	SPAC343.19;SPAC824.01	1.027	1	0.971	1.142	0.995184
	SPAC824.02	SPAC824.02	0.948	0.999	1.177	0.2392	0.142676
	SPCP1E11.10	SPCP1E11.10	0.925	0.579	0.956	0.897975	1.09974
	SPAC11E3.11c	SPAC11E3.11c	1.365		1.119	0.866914	0.887344
	SPCP1E11.11	SPCP1E11.11	0.943	1.02	1.306	0.800548	0.957139
nft2;ntf2;nxt2	SPAC15F9.03c	SPAC15F9.03c;SPAC1B9.01c;nft2;ntf2;nxt2	1.208	0.652	1.043	1.07446	0.985092
	SPAC824.04	SPAC824.04	0.862	1.013	0.865	1.04032	0.876866
	SPAC15E1.10	SPAC15E1.10;SPAP7G5.01			1.054	0.810607	0.861894
tim14	SPAC824.06	SPAC824.06;tim14	0.973	1.083	0.937	1.04238	0.637245
	SPAP7G5.03	SPAP7G5.03			1.157	0.905862	0.839481
	SPAC824.07	SPAC824.07	1.095	1.165	1.033	1.06286	1.04333
gda1;gdp1	SPAC824.08	SPAC824.08;gda1;gdp1	1.004	1.013	1.115	0.742377	0.364472
	SPAC1F5.03c	SPAC1F5.03c	0.952	1.046	1.019	1.10979	1.05725
	SPAC227.16c	SPAC227.16c	0.968	0.915	1.012	1.1456	1.31509
rng2	SPAC4F8.13c	SPAC4F8.13c;rng2	0.882	0.912	0.798	0.884679	0.66743
	SPAP7G5.06	SPAP7G5.06	0.754	0.972	0.678	0.839665	1.29208
rng3	SPCC613.04c	SPCC613.04c;rng3			0.971	1.10485	1.39867
pgi1	SPBC1604.05	SPBC1604.05;pgi1	1.01	1.43	0.908	0.987627	1.08454
pi004	SPBC11B10.07c	SPBC11B10.07c;pi004	1.173	0.919	0.932	0.827292	0.847927
	SPBC106.07c	SPBC106.07c			1.01	1.25868	1.23375
pi005	SPBC11B10.06	SPBC11B10.06;pi005		0.923	1.135	1.32179	1.10339
	SPAPB18E9.04c	SPAPB18E9.04c	1.211	0.98	0.982	0.797615	0.710427
ppr2;tfs1	SPAC20H4.03c	SPAC20H4.03c;ppr2;tfs1	1.044	0.589	1.014	1.30806	1.13324
	SPBPB21E7.10	SPAPB21E7.10;SPBPB21E7.10	1.345	1.502	1.582	0.990099	1.07431
pi006;rsp1	SPBC11B10.05c	SPBC11B10.05c;pi006;rsp1			0.969	0.946895	0.958957
mrps28;pi007	SPBC11B10.04c	SPBC11B10.04c;mrps28;pi007	1.051	1.07	1.157	0.814147	0.956147
mde1	SPAC16E8.05c	SPAC16E8.05c;mde1				1	1
pi008	SPBC11B10.03	SPBC11B10.03;pi008	1.296	1.217	1.188	0.826962	0.959345
	SPAC23H4.13c	SPAC23H4.13c	1.163	0.912	0.928	0.984897	0.836675
	SPAC1556.08c	SPAC1556.08c;SPAC1F12.01c	1.128	1.006	1.056	1.30989	1.20877
	SPAC1399.02	SPAC1399.02	0.744	0.669	0.622	1.05256	0.704372
mde7	SPCC320.07c	SPCC320.07c;mde7				1	1
	SPCC330.19c	SPCC330.19c	0.98			0.737311	0.626705
	SPCC18B5.09c	SPBC18B5.09c;SPCC18B5.09c				0.750517	0.833125
rad16;rad20;swi9;rad10	SPCC970.01	SPCC970.01;rad16;rad20;swi9;rad10	0.967	1.077	1.042	1.31524	1.44876
	SPBP8B7.08c	SPBP8B7.08c	1.142	0.961	1.031	0.964242	1.01026
	SPAC1071.03c	SPAC1071.03c	0.834	0.722	1.044	1.00795	1.09614
nop9	SPAC6G9.02c	SPAC6G9.02c;nop9	0.895	1.151	1.443	0.894255	1.11757
fkh2	SPBC16G5.15c	SPBC16G5.15c;fkh2	1.089	1.323	0.929	1.04905	1.3047
	SPBC21C3.14c	SPBC21C3.14c	0.984	1.126	1.044	1.1129	1.12901
ptc3	SPAC2G11.07c	SPAC2G11.07c;ptc3	0.918	0.968	0.922	0.843087	0.87607
qcr1;mas1	SPBP23A10.15c	SPBP23A10.15c;qcr1;mas1	0.923	0.965	1.109	0.790044	0.740815
sak1	SPAC3G9.14	SPAC3G9.14;sak1	1.048	0.752	1.073	0.918374	0.73361
ptc4	SPAC4A8.03c	SPAC4A8.03c;ptc4	1.001	1.12	0.95	1.26277	1.13788
	SPAC3G9.10c	SPAC3G9.10c	1.079	0.913	1.161	0.833799	1.03299
	SPAC31G5.02	SPAC31G5.02	0.916	0.951	0.929	0.891756	0.663546
spp2;pri2	SPBC17D11.06	SPBC17D11.06;spp2;pri2	0.889	1.239	1.063	0.866092	0.917229
	SPAC31G5.04	SPAC31G5.04	1.019	1.141	0.937	1.02469	0.829816
	SPBC17D11.08	SPBC17D11.08	0.938		0.785	0.688089	0.521046
	SPAC31G5.06	SPAC31G5.06			1.081	0.933994	0.728136
	SPAC31G5.07	SPAC31G5.07	1.028			1.27845	0.812886
	SPBC1709.16c	SPBC1709.16c	1.024	0.954	0.981	1.08335	1.01855
Pol-kappa	SPCC553.07c	SPCC553.07c;Pol-kappa	3.638	4.458	3.982	2.86239	3.89057
	SPAC19A8.07c	SPAC19A8.07c	1.106	0.936	1.18	1.01697	1.14239
mrp21	SPBC839.09c	SPBC24E9.09c;SPBC839.09c;mrp21	1.051	0.855	1.025	1.35899	1.09879
	SPAC4F10.03c	SPAC4F10.03c	1.029	0.76	0.954	1.17926	1.04084
rga5	SPBC17F3.01c	SPBC17F3.01c;SPBC557.01;rga5			0.809	0.898954	0.573195
pik1	SPAC22E12.16c	SPAC22E12.16c;pik1	0.964	0.986	1.022	0.938576	0.898565
	SPAC16E8.17c	SPAC16E8.17c	0.98	0.968	0.936	1.11337	1.09998
ppk29	SPBC557.04	SPBC557.04;ppk29	1.073	1.04	0.95	0.930914	0.83568
	SPBC557.05	SPBC557.05				0.395137	0.465414
Tf2-3	SPAC2E1P3.03c	SPAC2E1P3.03c;Tf2-3	1.403	1.519	1.221
	SPAC3G9.11c	SPAC3G9.11c	0.807		0.167	1.3688	1.06787
eta2	SPAC31G5.10	SPAC31G5.10;eta2				0.794905	1.16349
Tf2-11;SPBC8E4.11c	SPBC1289.17	SPBC1289.17;Tf2-11;SPBC8E4.11c
	SPAC20G8.10c	SPAC20G8.10c;SPAC3A12.01;SPAC3A12.01c			0.91	0.784393	0.697111
	SPBC19G7.10c	SPBC19G7.10c	1.012	1.048	0.97	1.03418	0.894398
	SPBC2D10.04	SPBC2D10.04	0.957	0.822	0.944	1.16659	0.939971
slx4	SPAC688.06c	SPAC688.06c;slx4			0.923	0.873219	1.02501
	SPRRNA.21	SPRRNA.21
tfg3;taf14	SPAC22H12.02	SPAC22H12.02;tfg3;taf14	1.015	0.922	1.059	1.15614	1.2177
	SPRRNA.22	SPRRNA.22
	SPAC22H12.03	SPAC22H12.03	1.099		1.167	1.16218	1.24263
	SPAC57A7.05	SPAC57A7.05		0.857	0.602	0.804054	0.69159
	SPRRNA.23	SPRRNA.23
	SPAC57A7.06	SPAC57A7.06	0.887	1.061	1.133	0.749837	0.893687
	SPRRNA.24	SPRRNA.24
	SPRRNA.25	SPRRNA.25
	SPRRNA.26	SPRRNA.26
	SPAC57A7.09	SPAC57A7.09				0.771295	0.595809
rpl3701;rpl37-1;rpl37	SPBC1921.01c	SPBC1921.01c;SPBC29C10.01c;rpl3701;rpl37-1;rpl37	0.962	0.869	0.845	0.908605	0.932495
rpl37-2;rpl37;rpl3702	SPCC1223.05c	SPCC1223.05c;rpl37-2;rpl37;rpl3702	1.016	1.022	0.966	0.999732	0.998506
	SPRRNA.27	SPRRNA.27
mrps18	SPAC1B3.18c	SPAC1B3.18c;mrps18		0.935	0.956	1.12311	1.06388
	SPRRNA.28	SPRRNA.28
	SPBC119.17	SPBC119.17;SPBC577.01	0.996	1.197	1.098	1.25377	0.933527
	SPRRNA.29	SPRRNA.29
	SPBC577.04	SPBC577.04	0.963	0.865	1.033	0.844244	0.859472
ubp10	SPBC577.07	SPBC577.07;ubp10	1.025	0.841	0.822	1.25822	1.53739
pi055;rmt3	SPBC8D2.10c	SPBC8D2.10c;pi055;rmt3	0.914	1.01	1.247	0.828766	1.05041
	SPAC1687.02	SPAC1687.02	1.086	0.784	1.048	0.953791	0.913362
ytm1	SPBC577.09	SPBC577.09;ytm1	1.116	0.984	1.071	0.961547	0.914708
	SPAC1687.04	SPAC1687.04	0.87	1.131	1.027	0.722282	0.72524
vps66	SPAC1783.02c	SPAC1783.02c;vps66	1.001	0.989	1.121	1.34592	1.31875
wsp1	SPAC4F10.15c	SPAC4F10.15c;wsp1	0.974	0.784	0.87	0.330223	0.337365
pli1	SPAC1687.05	SPAC1687.05;SPAC2E11.05c;pli1	1.071	0.876	0.869	1.05777	1.21639
	SPAC1687.07	SPAC1687.07;SPAC2E11.03c	0.86	0.558	0.936	0.69938	0.399052
	SPAC1687.08	SPAC1687.08;SPAC2E11.02c			0.985	0.60836	0.408581
	SPAC1687.09	SPAC1687.09;SPAC2E11.01c	1.075	0.858	0.806	0.854407	0.963257
	SPCC16C4.06c	SPCC16C4.06c		1.178	0.981	1.13228	0.755993
	SPBC24C6.02	SPBC24C6.02		1.164	1.019	0.73692	0.769967
sks1;rpn11;cep1;pad1;mts5;bfr2	SPAC31G5.13	SPAC31G5.13;sks1;rpn11;cep1;pad1;mts5;bfr2	0.933	0.972	0.857	1.19891	0.958757
	SPBC24C6.03	SPBC24C6.03			0.956	0.873446	1.01936
	SPBC24C6.04	SPBC24C6.04	0.979	1.03	1.024	0.957348	0.891826
	SPAC57A7.12	SPAC57A7.12	0.947	1.149	1.183	0.944748	1.03907
	SPRRNA.30	SPRRNA.30
	SPAC57A7.13	SPAC57A7.13			1.123	0.745716	0.913311
	SPAC688.07c	SPAC688.07c	0.871		0.898	0.733966	0.815976
	SPRRNA.31	SPRRNA.31
	SPRRNA.32	SPRRNA.32
	SPRRNA.33	SPRRNA.33
	SPRRNA.34	SPRRNA.34
	SPRRNA.35	SPRRNA.35
	SPRRNA.36	SPRRNA.36
	SPRRNA.37	SPRRNA.37
	SPBC577.10	SPBC577.10	1.091	0.867	0.943	1.08637	1.04574
	SPRRNA.38	SPRRNA.38
	SPNCRNA.130	SPNCRNA.130
	SPBC577.11	SPBC577.11	0.864	0.885	0.932	1.25661	1.15715
	SPRRNA.39	SPRRNA.39
	SPBC577.12	SPBC577.12	0.881	0.881	1.018	1.03887	1.20551
	SPAC23D3.05c	SPAC23D3.05c				1.02558	1.02346
	SPBC577.13	SPBC577.13			0.791	1.02959	1.18211
pcy1;cpy1	SPAC19G12.10c	SPAC19G12.10c;pcy1;cpy1	0.976	0.901	0.767	0.852136	0.811848
mcp1	SPAC1687.10	SPAC1687.10;mcp1	0.921	0.855	1.049	1.20866	1.46791
chd1;hrp1	SPAC1783.05	SPAC1783.05;chd1;hrp1		0.849	1.027	0.758219	1.09863
ash2	SPBC13G1.08c	SPBC13G1.08c;ash2	1.243	1.132		1.11091	1.18921
hrp3	SPAC3G6.01	SPAC3G6.01;hrp3	1.05	1.015	1.002	0.752602	1.01487
inv3;inv1	SPCC191.11	SPCC191.11;inv3;inv1	1.36	1.471	1.29	1.08687	1.5194
	SPBC8E4.01c	SPBC8E4.01c;SPBP4G3.01	0.745	0.988	1.137	1.22245	1.12098
cwf14	SPBC24C6.11	SPBC24C6.11;cwf14	0.935	0.796	1.022	0.96188	1.00531
	SPAC17D4.03c	SPAC17D4.03c	0.998	1.291	1.053	0.921878	0.996513
	SPAC27D7.08c	SPAC27D7.08c	1.094		1.011	1.35218	1.35541
aap1	SPBC1652.02	SPBC1652.02;SPBC16A3.20c;aap1				0.812756	0.844775
	SPCC594.03	SPCC594.03				1	1
cox4	SPAC1296.02	SPAC1296.02;cox4	0.99	0.874	1.181	0.795921	0.764454
orp2;orc2	SPBC685.09	SPBC685.09;orp2;orc2	1.032	1.039	0.994	1.24701	1.40546
nup146;nup159	SPAC23D3.06c	SPAC23D3.06c;nup146;nup159	1.023	1.002	0.968	0.819607	0.939095
mug117	SPCC645.11c	SPCC645.11c;mug117				1.00097	1.00494
	SPBC25H2.16c	SPBC25H2.16c	1.031	0.841	0.931	1.04679	1.07016
mug97;meu33	SPBC146.11c	SPBC146.11c;mug97;meu33			0.839	0.950247	0.901153
pi053	SPBC8D2.12c	SPBC8D2.12c;pi053	1.019		1.006	0.895798	0.877616
tsc2	SPAC630.13c	SPAC630.13c;tsc2	0.681	0.908	0.826	0.882975	0.954825
apc5	SPAC959.09c	SPAC959.09c;SPAP32A8.01c;apc5			0.902	1.11729	1.40497
alg3	SPAC7D4.06c	SPAC7D4.06c;alg3			0.833	1.1352	1.2132
skb15	SPCC16C4.08c	SPCC16C4.08c;skb15	0.873	0.653	1.357	1.04448	1.29773
cho1	SPBC337.16	SPBC337.16;cho1	1.042			1.15398	1.13652
cho2	SPBC26H8.03	SPBC26H8.03;cho2	0.908	1.227	1.04	1.1113	1.27308
rip1	SPBC16H5.06	SPBC16H5.06;rip1	1.146	0.919	0.966	0.766223	0.6415
	SPBC8E4.02c	SPBC8E4.02c	1.046	1.179	1.27	0.846992	0.865079
H3.1;hht1	SPAC1834.04	SPAC1834.04;H3.1;hht1	0.828	0.909	0.985	1.11115	1.02217
	SPAC27D7.09c	SPAC27D7.09c	1.546	1.198	1.13	1.73898	3.3829
	SPAC4G9.20c	SPAC4G9.20c	0.764	0.898	0.584	1.18378	0.754151
	SPAC1F3.03	SPAC1F3.03	1.191	1.013	0.889	1.08774	1.14172
	SPAC1F3.05	SPAC1F3.05	1.165	1.096	1.1	1.01988	0.884002
	SPCC645.12c	SPCC645.12c	1.058	1.086	0.979	0.866616	1.17257
	SPAC1F3.09	SPAC1F3.09	0.98	0.867	0.737	1.15069	1.09819
mep33	SPBC28F2.02	SPBC28F2.02;mep33	0.907	1.172	0.988	1.01489	0.946241
sti1	SPCC645.14c	SPCC645.14c;sti1	0.908	1.34	0.575	1.40203	1.66951
sfr1;dds20;mug13	SPBC28F2.07	SPBC28F2.07;sfr1;dds20;mug13			1.141	1.10036	1.0087
	SPBC28F2.09	SPBC28F2.09	0.918	1.152	0.934	0.969754	0.860392
chp1	SPAC18G6.02c	SPAC18G6.02c;chp1	0.992	1.088	0.976	0.763586	0.741382
chp2;clo2	SPBC16C6.10	SPBC16C6.10;chp2;clo2			0.965	0.890358	0.939098
	SPCPJ732.02c	SPCPJ732.02c	0.934	1.232	0.871	0.938641	0.959387
	SPAC1D4.01	SPAC1D4.01;SPAC1F3.11	1.161	0.799	1.026	0.681314	0.887082
coq5	SPCC4G3.04c	SPCC4G3.04c;coq5	0.846	1.069	1.007	1.04683	0.882314
tif1;tif411	SPAC1006.07	SPAC1006.07;tif1;tif411	0.852	0.929	0.913	0.943525	0.99025
gpt2;gpt1;alg7;gpt	SPBC15D4.04	SPBC15D4.04;gpt2;gpt1;alg7;gpt	0.86	1.06	1.072	1.13672	0.841692
	SPCC622.10c	SPCC622.10c	0.931	0.812	0.884	0.799813	0.905203
sec19;gdi1	SPAC22H10.12c	SPAC22H10.12c;sec19;gdi1	0.954	0.982	0.719	1.10961	1.13891
	SPBC28F2.11	SPBC28F2.11	0.923	0.967	0.95	1.06533	1.30718
	SPAC31G5.15	SPAC31G5.15			0.884	1.0496	1.05723
	SPAC3A12.02	SPAC3A12.02	1.038	1.309	1.13	1.69578	1.52989
	SPAC31G5.19	SPAC31G5.19				0.954028	0.930143
ams1;H4.1;h4.1;hhf1	SPAC1834.03c	SPAC1834.03c;ams1;H4.1;h4.1;hhf1	0.751	0.774	1.105	0.901252	0.781815
	SPBC776.03	SPBC776.03	0.942	0.981	0.891	1.00299	1
	SPBC2D10.09	SPBC2D10.09	0.96	1.127	1.018	1.04709	1.01216
	SPCC777.03c	SPCC777.03c			1.569	2.02588	1.83796
	SPCC1620.03	SPCC1620.03			0.895	1.24045	1.38453
	SPBC776.07	SPBC776.07	0.985	0.983	0.986	0.810586	0.892931
SPC12C2.07c	SPBC12C2.07c	SPBC12C2.07c;SPC12C2.07c	0.842	1.093	0.853	0.928132	0.922184
ran1;pat1	SPBC19C2.05	SPBC19C2.05;ran1;pat1	0.885	0.798	0.686	0.736918	0.514101
	SPBC1773.16c	SPBC1773.16c			0.87	1.02012	0.990036
	SPCC1620.05	SPCC1620.05	0.843		1.035	0.979969	1.06303
rsm1	SPCC1753.05	SPCC1753.05;rsm1				0.883111	1.16686
	SPBC3B8.11	SPBC3B8.11	0.875	1.238	0.852	1.01575	1.24619
	SPBC11C11.11c	SPBC11C11.11c;SPBC3B8.12	1.144	0.807	1.049	0.81871	0.888086
	SPCC1620.08	SPCC1620.08	0.987	1.533	0.836	1.02057	1
mrpl24	SPBC14C8.10	SPBC14C8.10;mrpl24	0.96	0.876	1.174	1.19808	1.16912
pld9;cut23;apc8	SPAC6F12.14	SPAC6F12.14;pld9;cut23;apc8			0.986	1.13442	1.30851
	SPBC14C8.13	SPBC14C8.13		0.778	0.965	0.909341	0.943883
	SPAC6F12.17	SPAC6F12.17	0.854	0.909	0.851	1.05424	1.19388
	SPBC14C8.15	SPBC14C8.15	0.94	0.946	0.95	1.1747	1.24595
cta1;ctt1	SPCC757.07c	SPCC757.07c;cta1;ctt1		1.525	0.788	0.780337	0.850342
cta3	SPBC839.06	SPBC24E9.06;SPBC839.06;cta3	1			1.02308	1
rph1;pif1;pfh1;rph1B87.13c	SPBC887.14c	SPBC887.14c;rph1;pif1;pfh1;rph1B87.13c	1.958	2.495	2.331	2.37896	2.646
prz1	SPAC4G8.13c	SPAC4G8.13c;prz1	1.031	0.935	0.915	0.534392	0.220726
nrm1	SPBC16A3.07c	SPBC16A3.07c;nrm1	3.65	3.224	4.271	4.83267	5.47306
	SPBC1271.08c	SPBC1271.08c			0.68	3.55809	2.17466
	SPAC20G4.05c	SPAC20G4.05c		1.052	0.797	0.803892	0.78466
	SPBC19G7.18c	SPBC19G7.11c;SPBC19G7.18c	1.261	1.088	1	0.827361	0.812938
est1	SPBC2D10.13	SPBC2D10.13;est1	1.095	0.931	0.981	1.01751	1.25631
	SPBC3E7.04c	SPBC3E7.04c		0.92	1.086	1.20278	1.33838
	SPAC644.05c	SPAC644.05c	3.926	2.926	3.143	3.51697	4.00178
	SPBC2D10.16	SPBC2D10.16	1.219	1.054	1.095	0.967091	0.953428
clr1	SPBC2D10.17	SPBC2D10.17;clr1	0.992	1.154	0.864	0.948285	1.04464
	SPAC11H11.02c	SPAC11H11.02c		0.965	1.063	1.15366	1.05054
cwf26	SPCC1620.10	SPCC1620.10;cwf26			0.965	0.910867	1.20316
plh1	SPBC776.14	SPBC776.14;plh1	0.968	1	1.041	1.10269	1.43788
aza1;ade4;min13	SPAC4D7.08c	SPAC4D7.08c;aza1;ade4;min13	1.022	1.339	1.109	0.985616	1.00886
	SPCC1620.11	SPCC1620.11	0.863	1.141	0.896	0.844676	1.0112
	SPBC776.16	SPBC776.16				1.12998	1.14814
	SPCC1620.13	SPCC1620.13				1.09145	1.22362
	SPBC776.17	SPBC776.17	1.122	0.783	1.113	0.854991	0.961192
	SPBC1773.17c	SPBC1773.17c;SPBP26C9.01c	1.06		0.809	1.02159	1.01378
	SPAC4G8.04	SPAC4G8.04	1.056	0.558	0.945	0.715004	0.724825
	SPAC3A12.03c	SPAC3A12.03c	0.991	1.624	1.113	0.995718	1.07186
ppk14	SPAC4G8.05	SPAC4G8.05;ppk14	1.083	1.15	1.022	0.617949	0.543442
	SPCC1494.03	SPCC1494.03	1.094	1.096	0.771	1.13338	1.05385
	SPAC13F5.07c	SPAC13F5.07c				1.0085	1.03864
	SPAC4G8.08	SPAC4G8.08	1.017	0.999	1.067	1.03965	1.09346
	SPAC4G8.09	SPAC4G8.09	0.973	0.658	1.021	0.773799	1.03111
	SPCC1494.07	SPCC1494.07	0.963	1.02	1.028	0.947224	1.19775
sup35;eRF3;erf3	SPCC584.04	SPCC584.04;sup35;eRF3;erf3	0.903	1.077	1.043	0.987071	1.07409
	SPBC16A3.08c	SPBC16A3.08c	1.037	1.091	0.89	1.04474	1.01592
ppk30	SPBC6B1.02	SPBC6B1.02;ppk30	1.038	0.915	0.922	0.800126	0.856482
mfr1;fzr1	SPBC1198.12	SPBC1198.12;SPBC660.02;mfr1;fzr1				1.02158	1
mde4	SPBC6B1.04	SPBC6B1.04;mde4	1.114	0.907	1.21	1.07865	1.25668
	SPNCRNA.93	SPNCRNA.93	1.458	1.112	0.681
		NULL_SPBC19G7.12c			0.939
	SPBC660.05	SPBC660.05			1.25	0.970384	0.970384
pgs2;bgs2;meu21;gls2	SPAC24C9.07c	SPAC24C9.07c;pgs2;bgs2;meu21;gls2			1.066	0.958649	1.03776
	SPBC3E7.05c	SPBC3E7.05c	1.038	0.839	0.997	1.13381	0.954613
	SPBC660.06	SPBC660.06	0.974	1.312	0.71	0.54145	0.3286
	SPBC660.08	SPBC660.08	1.02		1.039	0.927404	1.20101
	SPBC660.09	SPBC660.09	0.998	1.087	1.049	0.840446	0.923727
	SPAC11H11.03c	SPAC11H11.03c		1.225	1.104	0.829191	0.762158
	SPBC13E7.03c	SPBC13E7.03c	1.071	0.92	0.937	0.846156	0.976616
	SPBC12C2.09c	SPBC12C2.09c			1.141	1.20311	1.12615
	SPNCRNA.10	SPNCRNA.10		0.94	0.52
	SPNCRNA.11	SPNCRNA.11
	SPNCRNA.12	SPNCRNA.12
	SPAC3A12.04c	SPAC3A12.04c	0.976	1.116	1.021	0.62141	0.773756
	SPNCRNA.13	SPNCRNA.13
	SPNCRNA.14	SPNCRNA.14
	SPNCRNA.15	SPNCRNA.15
	SPNCRNA.16	SPNCRNA.16	1.083	1.026
	SPNCRNA.19	SPNCRNA.19			1.297
	SPCC757.11c	SPCC757.11c	1.065	1.264	0.971	1.70414	0.791054
dps;dps1	SPBPJ4664.01	SPBPJ4664.01;SPBPJ694.01;dps;dps1			0.935	0.919302	1.14349
	SPAC31G5.18c	SPAC31G5.18c			1.053	0.9922	0.893777
med1;yrb1;sbp1	SPBC1773.07c	SPBC1773.07c;med1;yrb1;sbp1	1.122	0.905	1.162	0.98928	1.06975
	SPAC4G8.15c	SPAC4G8.15c	0.98	0.917		1	1
ubl1;nedd8;ned8	SPBC12D12.08c	SPBC12D12.08c;SPBC24C6.01c;ubl1;nedd8;ned8	1.041	1.032	1.062	0.915379	0.993909
	SPBC660.10	SPBC660.10			1.169	0.845272	1.38477
	SPAC9E9.17c	SPAC9E9.17c				1	1
sup45	SPAC1834.01	SPAC1834.01;sup45	0.946	0.977	1.086	0.901711	0.985313
hos3;hsk3;dad5	SPCC417.02	SPCC417.02;hos3;hsk3;dad5			1.273	1	1
hub1;ubl4	SPBC31E1.03	SPBC31E1.03;hub1;ubl4	1.143	0.852	1.153	1.05926	1.07599
	SPAP14E8.02	SPAP14E8.02	5.11	5.679	3.79	3.77706	4.6832
	SPBC660.15	SPBC660.15	0.984	0.927	1.028	0.763947	0.848139
	SPBC3E7.06c	SPBC3E7.06c	0.828	1.039	0.971	1.17903	1.30083
gnd	SPBC660.16	SPBC660.16;gnd	0.866	1.146	0.751	1.00466	1.06716
	SPAP14E8.04	SPAP14E8.04			1.173	0.986153	1.00376
	SPCC777.06c	SPCC777.06c	1.029	0.974	1.172	1.32612	1.16704
	SPNCRNA.20	SPNCRNA.20
	SPCC970.10c	SPCC970.10c	1.021	1.06	0.936	1.03795	1.2773
	SPBCPT2R1.02	SPBCPT2R1.02				0.303376	0.0472514
	SPNCRNA.21	SPNCRNA.21
	SPBCPT2R1.03	SPBCPT2R1.03
	SPNCRNA.22	SPNCRNA.22
taf2	SPAC3A12.05c	SPAC3A12.05c;taf2	1.053	0.946	1.002	0.763306	0.978038
	SPNCRNA.23	SPNCRNA.23
	SPNCRNA.24	SPNCRNA.24	0.761		0.905
	SPNCRNA.25	SPNCRNA.25
	SPNCRNA.26	SPNCRNA.26	1.008
	SPNCRNA.27	SPNCRNA.27
	SPAC17C9.14	SPAC17C9.14	1.033		0.891	1.03749	1.1467
	SPAC323.01c	SPAC323.01c	1.011	1.187	1.277	1.58028	1.46782
myo1	SPBC146.13c	SPBC146.13c;myo1	0.909	1.118	0.828	0.963119	0.905486
tif6	SPCC1919.09	SPCC1919.09;tif6	0.84	1.399	1.068	1.06097	1.00533
apg12;atg12	SPAC1783.06c	SPAC1783.06c;apg12;atg12				1.29746	1.30132
ape1	SPBC1921.05	SPBC1921.05;ape1	1.124	1.056	0.815	0.915754	1.00036
	SPBC1198.01	SPBC1198.01			1.335	0.522257	0.466915
dea2	SPBC1198.02	SPBC1198.02;dea2	1.77	1.395	2.313	1.56045	1.6071
tpp1	SPAC19G12.15c	SPAC19G12.15c;tpp1	1.272	1.071	0.8	1.08302	1.17049
	SPBC1198.05	SPBC1198.05	0.988	1.121	1.113	1.10487	1.17758
	SPBC1198.08	SPBC1198.08	0.856	0.906	0.85	0.929633	0.963541
ade1BC3.03;min4;ade1	SPBC405.01	SPBC405.01;SPBC4C3.02c;ade1BC3.03;min4;ade1	0.977	1.239	1.008	0.883208	1.0337
	SPBC409.12c	SPBC409.12c			1.069	1.00105	1.05436
	SPAPB17E12.03	SPAPB17E12.03	0.859		0.908	1.05421	0.987734
	SPAPB17E12.06	SPAPB17E12.06		0.846		1.05889	1.54491
sex1;aim1;ark1	SPCC320.13c	SPCC320.12c;SPCC320.13c;SPCC330.16;sex1;aim1;ark1			0.786	1.17972	1.06773
	SPAPB17E12.08	SPAPB17E12.08	0.688		1.03	0.916679	0.758933
	SPAPB17E12.09	SPAPB17E12.09				1.17457	1.87444
	SPCC364.01	SPCC364.01	1.01	0.934	1.223	0.783051	0.782149
rps1001;rps10-1;rps10	SPAC31G5.17c	SPAC31G5.17c;rps1001;rps10-1;rps10	0.966	1.077	0.987	0.975474	0.988934
	SPCC364.06	SPCC364.06	0.95	1.038	0.962	0.819251	0.892904
	SPCC364.07	SPCC364.07;SPCC4G3.01	0.851	1.275	0.685	1.01583	1.22124
mrpl4	SPCC4G3.06c	SPCC4G3.06c;mrpl4	1.195	1.162	1.037	1.12473	0.780728
adh1;adh	SPCC13B11.01	SPCC13B11.01;adh1;adh	0.856	1.012	0.827	1.01851	1.05142
srp14	SPAC19B12.09	SPAC19B12.09;srp14	1.098	0.871	0.993	1.05336	1.08034
	SPAC7D4.09c	SPAC7D4.09c	1.003	1.144	1.157	1.00242	1.02426
	SPBC23E6.02	SPBC23E6.02	1.054	0.902	0.981	0.894156	0.948026
	SPBC1539.01c	SPBC1539.01c	0.983	0.764	1.023	1.14927	1.07719
	SPAPB17E12.11	SPAPB17E12.11	0.88	0.911	0.963	0.918709	0.924915
	SPBC23E6.05	SPBC23E6.05	1.02	0.909	1.199	1.06606	1.22639
	SPBC8E4.05c	SPBC8E4.05c				1.13738	1.43684
	SPBC23E6.09	SPBC23E6.09	0.836	1.066	0.876	0.892766	0.919145
	SPBC19G7.02	SPBC19G7.02	0.989		1.125	0.885379	1.04787
	SPAC19B12.02c	SPAC19B12.02c	0.919	1.323	0.86	0.929547	0.888018
	SPBC19G7.04	SPBC19G7.04			0.747	1.13068	1.26772
mbx1	SPBC19G7.06	SPBC19G7.06;mbx1		0.742	0.886	0.341271	0.247018
	SPAC17C9.11c	SPAC17C9.11c	1.258	0.742	0.932	1.0948	1.0689
	SPCC4G3.07c	SPCC4G3.07c	1.353	1.232	1.087	1.47944	1.67488
	SPCC622.12c	SPCC622.12c	0.735	0.868	0.703	0.850793	0.97009
	SPBC16D10.01c	SPBC16D10.01c;SPBC418.03c	0.969	1.064	1.183	0.980303	1.38318
dsk1	SPBC530.14c	SPBC530.14c;dsk1	0.784	0.937	0.922	1.18182	1.06765
pi049	SPBC8D2.16c	SPBC8D2.16c;pi049	1.12		1.243	1.033	1.11236
stg1	SPAC4F8.10c	SPAC4F8.10c;stg1	1.166	0.86	1.035	0.749764	0.88161
mok11	SPAC1527.01	SPAC1527.01;SPAC23D3.15;mok11	0.955		1.203	0.901318	0.953976
cid11	SPBC1685.06	SPBC1685.06;cid11				1.22539	1.24979
cid12	SPCC663.12	SPCC663.12;cid12			1.142	0.783812	0.902612
mok12;pi011	SPBC32H8.13c	SPBC32H8.13c;mok12;pi011	1.007	1.037	1.058	0.794839	0.769182
cid13	SPAC821.04c	SPAC821.04c;cid13	1.117	0.958	0.829	0.982909	0.369195
mok13	SPBC16D10.05	SPBC16D10.05;mok13		0.948	0.775	0.506653	0.521005
mok14	SPCC63.04	SPCC63.04;mok14	1.088	1.051	1.078	1.02158	1.09646
cid14	SPAC12G12.13c	SPAC12G12.13c;cid14	0.826	1.282	1.13	0.913918	0.975545
tpr1	SPAC27D7.14c	SPAC27D7.14c;SPAC637.02c;tpr1	1.001	0.942	0.824	0.712889	0.851875
	SPAC56E4.03	SPAC56E4.03	1.087	1.054	0.928	0.97352	0.964764
cid16	SPAC17H9.01	SPAC17H9.01;cid16	0.981	0.859		0.992985	1.12797
	SPAC56E4.05	SPAC56E4.05	0.862	0.497	1.02	1.16106	0.914116
mrps17	SPBC409.14c	SPBC409.14c;mrps17	1.04	0.873	1.058	1.04896	0.994173
	SPAC56E4.07	SPAC56E4.07	1.145	1.24	1.024	0.970013	0.851274
chs1B3H4.01c;chs1	SPAC13G6.12c	SPAC13G6.12c;SPAC24B11.01c;chs1B3H4.01c;chs1		1.078		0.73454	0.661518
atg9;apg9	SPBC15D4.07c	SPBC15D4.07c;atg9;apg9			0.849	0.986324	0.986324
chs2	SPBC1709.01	SPBC1709.01;SPBC1734.17;chs2			0.861	0.766702	0.834715
chs5;cfr1	SPAC6G9.12	SPAC6G9.12;chs5;cfr1	1.011	0.952	0.929	0.777349	0.519575
pus1;rpn10	SPAC637.10c	SPAC637.10c;pus1;rpn10	0.976	0.889	0.933	0.985042	0.986526
trf1	SPBC19G7.13	SPBC19G7.13;trf1	1.036	1.027	0.906	1.11562	0.898586
nup44	SPBC19G7.15	SPBC19G7.15;nup44	0.949	0.865	0.837	1.20952	1.05459
isw1	SPBC19G7.16	SPBC19G7.16;isw1				1.05463	0.884584
SPAP691.02	SPAPJ691.02	SPAPJ691.02;SPAP691.02	1.485	0.666	1.043	0.383728	0.187885
psm1;smc1	SPBC29A10.04	SPBC29A10.04;psm1;smc1	1.379	1.197	1.728	1.50121	1.69395
SPAP691.03	SPAPJ691.03	SPAPJ691.03;SPAP691.03				0.756958	0.703616
psm3;smc3	SPAC10F6.09c	SPAC10F6.09c;psm3;smc3	2.372	2.904	2.727	2.64806	3.08292
	SPCC622.13c	SPCC622.13c	1.062	0.976	1.059	0.631902	0.748739
cwf2;prp3	SPAC3A12.11c	SPAC3A12.11c;cwf2;prp3	1.203	0.959	1.108	0.943795	1.12928
pop3;wat1	SPBC21B10.05c	SPBC21B10.05c;pop3;wat1	0.936	1.038	0.894	0.891936	0.941319
stm1	SPAC17C9.10	SPAC17C9.10;stm1	0.938	0.88	1.068	0.899019	0.943489
aph1	SPCC4G3.02	SPCC4G3.02;aph1	1.027	1.077	1.164	1.45698	1.01472
sib2	SPAC23G3.03	SPAC23G3.03;sib2	0.894	1.109	0.653	0.778565	0.547061
	SPCC1919.15	SPCC1919.15;SPCC790.01			0.896	0.899373	1.12078
	SPAC25A8.02	SPAC25A8.02		1.01	0.928	1.14134	1.14134
	SPAC23G3.04	SPAC23G3.04	1.13		1.065	1.15767	1.24629
tps1;ggs1	SPAC328.03	SPAC328.03;tps1;ggs1	0.985	1.163	0.464	1.41504	1.78433
meu1	SPAC1556.06	SPAC1556.06;meu1	1.185			1.06039	1.04935
	SPCC790.03	SPCC790.03	0.692	0.985	0.557	0.779888	0.654013
	SPAC23G3.06	SPAC23G3.06	0.876	0.876	1.032	0.843251	0.978931
taf4	SPAC23G3.09	SPAC23G3.09;taf4	0.91	0.927	0.929	0.910829	0.980832
	SPBC1289.15	SPBC1289.15;SPBC8E4.07c	1.124	1.086	1.055	0.87794	0.577152
tef1-e;ef1-bBA1.09;ef1a-c;ef1-b	SPBC839.15c	SPBC24E9.15c;SPBC839.15c;tef1-e;ef1-bBA1.09;ef1a-c;ef1-b	0.826	0.851	0.888	0.921185	1.05757
rpl18;rpl1801;rpl18-1	SPBC11C11.07	SPBC11C11.07;rpl18;rpl1801;rpl18-1	0.957	0.935	0.922	0.967108	0.99618
dlc1	SPAC1805.08	SPAC1805.08;dlc1	1.07	1.025	1.02	0.880627	0.820836
smd1	SPAC27D7.07c	SPAC27D7.07c;smd1	0.972	0.996	1.088	0.896965	0.99863
mst1;HAG605	SPAC637.12c	SPAC637.12c;mst1;HAG605	0.965	0.725		0.943521	0.974864
gyp3	SPCC4G3.09c	SPCC4G3.09c;gyp3	1.371	1.249	1.281	1.10071	0.933768
smd3	SPBC19C2.14	SPBC19C2.14;smd3	0.955	0.681	1.029	1.02266	0.879414
orb7;cwg2	SPAC2E1P5.04c	SPAC2E1P5.04c;orb7;cwg2	1.37	1.047	1.013	1.28138	1.37662
pi047	SPBC8D2.18c	SPBC8D2.18c;pi047	0.865	0.978	0.867	0.882217	0.972293
	SPAC13G6.13	SPAC13G6.13;SPAC24B11.02				0.99165	1
	SPAPB1E7.03	SPAPB1E7.03	0.829	1.653	1.025	0.959093	0.98786
was previously annotated as dubious	SPBC409.16c	SPBC409.16c;was previously annotated as dubious				1.81606	1.76258
	SPAC24B11.05	SPAC24B11.05			0.865	0.986526	1.00282
	SPBC543.04	SPBC543.04	1.002	0.932	0.96	1.39584	1.52717
gls2	SPAC1002.03c	SPAC1002.03c;gls2	1.021	1.071	1.015	0.903479	1.16035
	SPAC24B11.09	SPAC24B11.09	0.9	1.02	0.938	0.944508	0.559348
	SPAC3A12.08	SPAC3A12.08			0.963	1.27734	1.10345
	SPCC285.13c	SPCC285.13c	0.959	0.923	1.014	1.08806	1.30703
	SPCC553.08c	SPCC553.08c	0.938	0.963	0.923	0.901511	0.801832
ntp1	SPBC660.07	SPBC660.07;ntp1			0.437	0.954926	1.09731
	SPAC3G6.03c	SPAC3G6.03c	1.037	1.028	1.107	1.05471	1.00217
	SPAPB17E12.10c	SPAPB17E12.10c	1.025		1.347	0.983426	1.0032
	SPNCRNA.97	SPNCRNA.97			0.715
	SPBC23E6.03c	SPBC23E6.03c			1.14	1.14572	1.16981
swi1	SPBC216.06c	SPBC216.06c;swi1				0.814343	1.07173
glo3	SPAC22E12.17c	SPAC22E12.17c;glo3	0.971	0.765	0.936	0.962361	1.04966
swi2	SPAC1142.03c	SPAC1142.03c;SPAC17G6.20c;swi2	0.964	0.94	0.859	0.898892	0.690407
scd2;ral3	SPAC22H10.07	SPAC22H10.07;scd2;ral3	1.058	0.861	0.874	0.590895	0.434355
msh3;swi4	SPAC8F11.03	SPAC8F11.03;msh3;swi4				0.764475	0.870875
	SPAC8E11.06	SPAC8E11.06				0.743826	0.790536
sam1	SPBC14F5.05c	SPBC14F5.05c;sam1	0.917	1.025	0.687	1.14249	1.09296
swi6	SPAC664.01c	SPAC664.01c;SPAC824.10c;swi6	0.978	0.772	0.943	1.03908	1.12734
mcm5;nda4BC7.13c;nda4	SPAC1B2.05	SPAC1B2.05;SPAC3F10.01;mcm5;nda4BC7.13c;nda4	0.985	0.886	0.96	0.996894	0.996894
	SPAC31G5.21	SPAC31G5.21	1.086		1.18	0.934449	0.970606
gwt1	SPAC144.10c	SPAC144.10c;gwt1	1.022	0.839	0.916	0.642948	0.482867
	SPAC1142.01	SPAC1142.01;SPAC17G6.18	0.97	0.953	0.879	1.08667	1.0514
esf2	SPBC28E12.05	SPBC28E12.05;SPBC3H7.17c;esf2	1.001	0.96	1.028	0.959536	1.17057
	SPAC1142.04	SPAC1142.04	0.956	0.939	1.313	0.780059	1.03426
atp11	SPAC3A12.12	SPAC3A12.12;atp11			1.182	1.24655	1.22448
ctr5	SPAC1142.05	SPAC1142.05;ctr5		1.063	1.616	1.09013	1.28294
	SPAC1142.06	SPAC1142.06	1.036	1.017	1.077	1.19941	1.1273
mpr1;spy1;sph1	SPBC725.02	SPBC725.02;mpr1;spy1;sph1	1.047	1.023	0.838	0.932573	0.726895
	SPAC3A12.19	SPAC3A12.19
eif3-a;tif31	SPBC530.06c	SPBC530.06c;eif3-a;tif31			1.168	0.941867	0.967372
	SPAC30.02c	SPAC30.02c			1.241	1.46991	1.45052
spb70;pol12	SPCC553.09c	SPCC553.09c;spb70;pol12	1.06	1.058	1.043	1.11379	1.1982
cia1	SPCC663.05c	SPCC663.05c;cia1	1.088	0.999	1.093	0.986453	1.22861
sec10	SPAC13F5.06c	SPAC13F5.06c;sec10	1.046	1.049	0.981	1.0942	1.10834
sec13	SPBC215.15	SPBC215.15;sec13				1.02777	0.930326
	SPBC23E6.04c	SPBC23E6.04c	0.925	1.014	1.137	0.759623	0.987714
sec14;spo20	SPAC3H8.10	SPAC3H8.10;sec14;spo20	0.816	1.034	0.848	0.888413	0.835295
set7	SPCC297.04c	SPCC297.04c;set7	1.257		0.943	1.14923	1.39549
sec15	SPCC1183.01	SPCC1183.01;SPCC1672.13;sec15	0.931	0.941	1.016	0.989925	1.11369
	SPAC4F10.05c	SPAC4F10.05c	1.118	0.784	1.051	0.827392	0.826633
	SPAC26A3.17c	SPAC26A3.17c;SPAC8E11.11	1.021	1.01	1.202	1.03163	1.01114
sec16	SPAC29B12.07	SPAC29B12.07;sec16	1.111	1.001	0.915	0.928765	0.924568
hus1	SPAC20G4.04c	SPAC20G4.04c;hus1			1.181	1.33686	1.1254
sec17	SPAC959.02	SPAC959.02;sec17	0.933	1.075	1.002	0.998594	0.822131
sec18	SPAC1834.11c	SPAC1834.11c;sec18	1.061	1.249	0.957	0.958351	1.04922
	SPBC2D10.15c	SPBC2D10.15c	1.198		1.212	1.43854	1.24967
	SPAC17G8.02	SPAC17G8.02	1.166	1.007	0.796	1.17373	0.851059
	SPBC17D11.02c	SPBC17D11.02c			0.856	1.02	1.22585
	SPAC3G9.13c	SPAC3G9.13c				1.09782	1.14318
	SPAC17G8.05	SPAC17G8.05	1.221	0.953	1	1.1999	1.19649
	SPAC16C9.01c	SPAC16C9.01c;SPAC4G8.14c	0.987	0.79	0.916	0.728264	0.728601
	SPAC17G8.07	SPAC17G8.07	1.108	1.006	0.966	1.03532	1.06437
	SPBC776.10c	SPBC776.10c			0.891	1.07726	1.38255
shg1	SPAC17G8.09	SPAC17G8.09;shg1			1.052	0.737146	0.91369
	SPBC530.07c	SPBC530.07c	0.874	0.819	1.217	1.58333	1.83889
tsn1;tsn	SPAC30.03c	SPAC30.03c;tsn1;tsn	0.934	0.614	1.048	1.59127	1.57355
rps15a-2;rps22-2;rps2202	SPAC5D6.01	SPAC5D6.01;rps15a-2;rps22-2;rps2202	0.952	1.113	1.027	1.07829	1.26933
pso2;snm1	SPAC22A12.01c	SPAC22A12.01c;SPAC56F8.17c;pso2;snm1	1.081	0.788	1.24	0.871726	0.834412
trr1;caf4	SPBC3F6.03	SPBC3F6.03;trr1;caf4				0.967899	0.977191
	SPCC663.06c	SPCC663.06c	1.41	1.464	4.317	1.49658	1.14493
spa1;spa	SPBC577.14c	SPBC577.14c;spa1;spa	0.971		0.829	1.07532	1.01365
	SPAP8A3.03	SPAP8A3.03	1.159	1.133	1.179	0.989163	1.06215
	SPNCRNA.123	SPNCRNA.123	0.967
	SPAP8A3.05	SPAP8A3.05				1.03616	1.20805
U2AF25;U2AF23	SPAP8A3.06	SPAP8A3.06;U2AF25;U2AF23	1.18	1.018	1.09	0.979004	0.860684
gmh1	SPAC5H10.11	SPAC5H10.11;gmh1	1.123	0.97	1.117	1	1
sec21	SPAC57A7.10c	SPAC57A7.10c;sec21	0.946	0.982	0.904	1.05612	1.11046
sec22	SPBC2A9.08c	SPBC2A9.08c;sec22	0.982	1.227	0.942	1.25657	1.13991
tlg1	SPBC36B7.07	SPBC36B7.07;tlg1	1.762	1.57	1.435	1.12148	1.09394
	SPAPB17E12.12c	SPAPB17E12.12c	1.014		0.937	1.63139	1.30312
		NULL_SPAC5H10.11.A			0.885
tlg2	SPAC823.05c	SPAC823.05c;tlg2			1.035	1.07264	1.21154
	SPAC30D11.03	SPAC30D11.03		0.993		0.801093	0.894046
sec24	SPAC22F8.08	SPAC22F8.08;sec24	0.974	1.132	0.931	0.947234	1.22828
sec26	SPBC146.14c	SPBC146.14c;SPBC337.01c;sec26	0.92	1.093	0.949	0.976447	1.03925
sec27	SPBC16C6.13c	SPBC16C6.13c;SPBC244.03;sec27	0.841	1.003	0.955	0.848583	1.0344
	SPAC926.05c	SPAC926.05c	1.11		1.067	1.25464	1.31999
sec28	SPBC24C6.05	SPBC24C6.05;sec28	1.025	0.938	1.031	0.894627	0.927981
cwf19	SPAC30D11.09	SPAC30D11.09;cwf19		1.195	0.782	0.92171	1.12587
	SPAC17G8.12	SPAC17G8.12	1.052	1.037	0.856	0.780107	1.21138
	SPBC17D11.03c	SPBC17D11.03c			1.434	1.50616	1.5881
	SPAC16C9.02c	SPAC16C9.02c	1.093	1.204	1.305	1.14049	1.02615
	SPAC3A11.10c	SPAC3A11.10c	0.976	1.232	0.952	0.554642	0.351137
trm11	SPBC16D10.02	SPBC16D10.02;trm11	1.005	1.026	1.257	1.07136	1.10873
pgp2	SPBC16D10.03	SPBC16D10.03;pgp2	1.131	0.926	1.127	0.937271	0.999362
	SPAC30.04c	SPAC30.04c	0.987	1.154	0.823	0.929296	1.0169
	SPAC22A12.02c	SPAC22A12.02c				1	1
	SPBC16D10.06	SPBC16D10.06	2.036	1.249	3.048	1.291	1.92014
	SPAP8A3.10	SPAP8A3.10	1.118	0.962	0.945	1.34982	1.29304
ubc12	SPCC777.10c	SPCC777.10c;ubc12			0.974	0.768181	1.06514
ubc13;spu13;sst5	SPAC11E3.04c	SPAC11E3.04c;ubc13;spu13;sst5	0.998	0.809	0.867	1.00831	0.969595
pro3	SPAPYUG7.05	SPAPYUG7.05;pro3	0.89	0.996	1.009	0.92366	0.968556
	SPCC663.07c	SPCC663.07c			1.432	1.08961	1.21574
ubc14	SPAC1250.03	SPAC1250.03;ubc14	1.106	1.143	1.044	1.20738	1.08843
hag1	SPAPYUG7.06	SPAPYUG7.06;hag1	1.401		1.165	1.15268	1.45083
	SPCC736.02	SPCC736.02	1.149	0.952	0.984	1.17597	1.2409
	SPAC869.01	SPAC869.01				0.953051	0.927281
ubcX;ubc15	SPBC1105.09	SPBC1105.09;ubcX;ubc15	0.872	0.974	1.235	1.4171	1.34464
	SPNCRNA.28	SPNCRNA.28	1.031	1.11	1.08
	SPAPB15E9.01c	SPAPB15E9.01c;SPAPB18E9.06c	0.881	0.71	0.517	0.897741	0.618205
ret2	SPCC285.08	SPCC285.08;ret2	0.974	0.857	0.961	1.17303	1.02948
ret3	SPCC576.07	SPCC576.07;ret3	0.912	0.767	1.002	1.19318	0.96965
	SPAC2G11.13	SPAC2G11.13	1.01	1.091	1.002	0.689786	0.391981
taf130;taf111;tafII-111;taf1	SPAC2G11.14	SPAC2G11.14;taf130;taf111;tafII-111;taf1			0.815	0.798367	0.936255
	SPCC1259.09c	SPCC1259.09c	0.976	0.789	0.965	1.00293	1.05096
	SPBC354.09c	SPBC354.09c	0.772	0.817	0.857	0.755217	0.680012
pic1	SPBC336.15	SPBC336.15;SPBC685.01;pic1	1.066	0.839	0.924	0.971461	1.10096
	SPAC22F8.04	SPAC22F8.04	0.951	1.109	1.025	0.875853	0.52213
	SPBC685.02	SPBC685.02				0.610113	1.33534
	SPAC22F8.05	SPAC22F8.05			0.257	0.544991	0.774892
	SPBC685.03	SPBC685.03				1.35415	1.82982
gpi15	SPBC685.05	SPBC685.05;gpi15	1.062	1.041	0.794	1.33167	1.21289
rps0;rpsa-1;rps001;rpsA-1;rps0-1	SPBC685.06	SPBC685.06;rps0;rpsa-1;rps001;rpsA-1;rps0-1	0.95	1.01	0.954	0.938999	0.997694
rrp16;nop53	SPAC22F8.09	SPAC22F8.09;rrp16;nop53	0.972	1.1	1.119	0.794666	1.08838
	SPBC685.08	SPBC685.08			1.028	0.895056	1.2741
	SPCC1795.07	SPCC1795.07	0.926	0.712	1.075	0.950356	0.988542
yps1	SPCC1795.09	SPCC1795.09;yps1	0.874	0.981	0.904	0.7781	0.62878
mcp6;hrs1	SPBC582.06c	SPAC19G10.06;SPBC582.06c;mcp6;hrs1				0.955025	0.925425
mug23;bqt1	SPAC6G9.13c	SPAC6G9.13c;mug23;bqt1		0.823		1.04569	1.04569
zfs1;moc4	SPBC1718.07c	SPBC1718.07c;zfs1;moc4	1.164	1.114	0.887	1.03523	0.784067
psp3	SPAC1006.01	SPAC1006.01;psp3	0.92	1.254	0.945	0.644194	0.535371
	SPAC1006.02	SPAC1006.02				1.40458	1.30162
	SPMIT.03	SPMIT.03	1.363	1.105	1.666	0.890128	0.89601
cox2	SPMIT.11	SPMIT.11;cox2	1.278	1.134	1.142	0.650845	1.76824
paa1	SPAP8A3.09c	SPAP8A3.09c;paa1	0.904	1.132	0.959	0.938447	1
cox1I1	SPMIT.02	SPMIT.02;cox1I1	1.286	1.052	1.432	0.91186	1.61577
atp6	SPMIT.07	SPMIT.07;atp6	1.326	1.011	1.133	0.707716	1.97728
atp8	SPMIT.09	SPMIT.09;atp8	1.339	0.899	1.136	0.888133	0.888133
rgf2	SPAC1006.06	SPAC1006.06;rgf2		0.737		0.665653	0.642452
atp9	SPMIT.10	SPMIT.10;atp9	1.293	0.824	0.94	0.874325	2.92677
	SPAC323.02c	SPAC323.02c	1.017	0.951	0.998	1.14474	1.0251
	SPAC821.13c	SPAC821.13c;SPAC955.01c	0.874	1.147	1.05	0.536594	0.442881
	SPNCRNA.75	SPNCRNA.75	0.917	1.088	1.043
	SPSNRNA.03	SPSNRNA.03
	SPBC31F10.10c	SPBC31F10.10c	0.971	0.752	0.889	0.816027	0.859231
	SPBC3H7.02	SPBC3H7.02	0.873	0.977	0.596	1.81474	1.88268
	SPBC3H7.04	SPBC3H7.04	1.054	1.091	1.088	1.11383	0.974005
car;car1;sod1;bsu1	SPAC17A2.01	SPAC17A2.01;SPAC1B1.05;car;car1;sod1;bsu1	0.482	0.643	0.56	0.858507	0.49424
	SPCC1742.01	SPCC1742.01;SPCC1795.13;SPCPB16A4.07c	1.352	1.113	1.871	1.13053	1.37301
mug142	SPBC3H7.09	SPBC3H7.09;mug142	1.067	1.105	1.202	1.55186	0.869905
hxk1;hsk1	SPAC24H6.04	SPAC24H6.04;hxk1;hsk1	1.012	1.425	1.124	1.07217	1.04553
	SPAC23G3.12c	SPAC23G3.12c	0.97	0.966	1.167	1.01133	1.11771
hxk2	SPAC4F8.07c	SPAC4F8.07c;hxk2	1.16	1.119	1.104	1.01777	1.13271
arc4;arp10	SPAC6G9.07c	SPAC6G9.07c;arc4;arp10	0.967	1.161	0.8	1.19604	0.853299
kes1	SPBC1271.12	SPBC1271.12;kes1	1.019	1.164	0.965	0.838344	0.838882
	SPBP4H10.11c	SPBP4H10.11c	0.851	0.82	0.956	0.860138	0.94889
brc1	SPBC582.05c	SPAC19G10.07;SPBC582.05c;brc1			1.046	0.903021	0.781567
pab1	SPAC227.07c	SPAC227.07c;pab1	0.981	0.845	0.922	1.17714	1.00364
pab2	SPBC16E9.12c	SPBC16E9.12c;pab2	0.91	1.189	1.102	1.08095	0.790778
gms1;gmn3	SPCC1795.03	SPCC1795.03;gms1;gmn3	0.827	0.631	0.972	0.731713	0.674213
urfA	SPMIT.08	SPMIT.08;urfA	1.303	1.014	1.149	0.67733	1.91252
	SPAC323.03c	SPAC323.03c	0.936		0.772	1.30283	1.43713
	SPBC30D10.17c	SPBC30D10.17c	0.99	0.945	0.994	0.862367	0.924404
gsk3;skp1	SPAC1687.15	SPAC1687.15;gsk3;skp1	1.043	1.033	0.923	1.10395	0.975113
	SPBC776.05	SPBC776.05			0.941	1.54256	1.3695
	SPCC830.08c	SPCC830.08c	0.966	0.915	0.85	0.955558	0.963002
gpi12	SPAPB2B4.01c	SPAPB2B4.01c;gpi12				1.06482	1.05158
	SPBC3H7.10	SPBC3H7.10	1.089		1.102	0.785524	0.819847
	SPAC19A8.02	SPAC19A8.02	1.115	0.955	1.039	0.738531	0.771638
	SPAC16A10.08c	SPAC16A10.08c;SPAC589.01c			1.059	1.00306	1.19532
	SPBC3H7.11	SPBC3H7.11	1.015	0.958	1.203	0.777899	0.998914
	SPAC19A8.03	SPAC19A8.03		1.026		0.998848	0.807803
	SPBC3H7.12	SPBC3H7.12	0.908	1.035	0.93	1.20082	1.46793
erg5	SPAC19A8.04	SPAC19A8.04;erg5	0.998	1.251	1.055	0.960931	0.999222
	SPBC3H7.13	SPBC3H7.13	1.044	0.996	1.083	0.653351	0.45049
	SPBC3H7.14	SPBC3H7.14				1.21592	0.878113
	SPAC19A8.06	SPAC19A8.06	1.013	1.051	1.225	1.10463	1.12333
	SPBC28E12.06c	SPBC28E12.06c;SPBC3H7.16	1.007	1.15	0.981	0.767724	0.935818
	SPAC19A8.09	SPAC19A8.09			1.008	1.05767	1.0574
pmf1;mmf1	SPBC2G2.04c	SPBC2G2.04c;pmf1;mmf1	1.006	0.991	0.891	1.0688	1.02171
	SPAC29B12.14c	SPAC29B12.14c	0.964	0.988	0.912	1.01655	1.06002
	SPAC6G9.15c	SPAC6G9.15c	1.219	1.239	1.105	1.40007	1.59876
itr1;itr1BD4.02c	SPAC4F8.15	SPAC4F8.15;SPAC7D4.01;itr1;itr1BD4.02c	1	1.085	1.382	0.874141	1.01433
brd1	SPBC1734.15	SPBC1734.15;brd1	0.969	0.809	0.903	0.822769	0.871766
itr2	SPAC20G8.03	SPAC20G8.03;itr2	0.741	0.577	0.856	0.676848	0.596742
	SPBC1289.08	SPBC1289.08	1.147	1.241	1.063	1.10763	1.18457
pac2	SPAC31G5.11	SPAC31G5.11;pac2	1.1	1.176	1.033	0.976306	0.964839
tim21	SPBC1289.09	SPBC1289.09;tim21	1.024	1.234	1.02	0.760862	0.79846
	SPCC830.09c	SPCC830.09c			0.887	1.06378	1.07139
cut1	SPCC5E4.04	SPCC5E4.04;cut1			0.981	0.765961	0.878165
[truncated: 3,346 more rows]
